# Supplementary material for: Coral Lipids
Source: MDPI journal article supplement (doi:10.3390/md21100539), 2023-10-15
Supplement: s1 [file s1]

# Supporting material.

## Coral Lipids

**Table S1.** The total lipid content in corals collected at the Great Barrier Reef (Australia) at the depth of 4 m in July [33].

| No. | Taxonomic group                            | Lipid content (mg/g of colony) |
|-----|--------------------------------------------|--------------------------------|
|     | <b>Scleractinia</b>                        |                                |
|     | Acroporidae                                |                                |
| 1*  | <i>Acropora hyacinthus</i>                 | 3.8                            |
| 2   | <i>Acropora echinata</i>                   | 9.7                            |
| 3   | <i>Astreopora ocellata</i>                 | 13.1                           |
|     | Agaraciidae                                |                                |
| 4   | <i>Gardineroseris planulata</i>            | 6.3                            |
| 5   | <i>Pachyseris rugosa</i>                   | 1.8                            |
|     | Capyophylliidae                            |                                |
| 6   | <i>Physosyra lichtensteini</i>             | 23.2                           |
|     | Dendrophyllidae                            |                                |
| 7   | <i>Tubastraea coccinea</i>                 | 26.3                           |
| 8   | <i>Dendrophyllia</i> cf. <i>micranthus</i> | 29.3                           |
| 9   | <i>Turbinaria</i> cf. <i>frondens</i>      | 5.5                            |
| 10  | <i>Turbinaria</i> cf. <i>sinensis</i>      | 7.1                            |
|     | Faviidae                                   |                                |
| 11  | <i>Caulastrea furcata</i>                  | 15.7                           |
| 12  | <i>Hydnophora rigida</i>                   | 22.6                           |
| 13  | <i>Hydnophora exasa</i>                    | 8.6                            |
| 14  | <i>Echinopora horrid</i>                   | 12.3                           |
| 15  | <i>Echinopora</i> cf. <i>hirsutissima</i>  | 4.6                            |
| 16  | <i>Favia favius</i>                        | 2.2                            |
| 17  | <i>Leptoria phyrgia</i>                    | 3.5                            |
| 18  | <i>Platygyra sinensis</i>                  | 1.9                            |
| 19  | <i>Hydrophora</i> sp.                      | 5.0                            |
| 20  | <i>Favia stelligera</i>                    | 1.3                            |
|     | Fugiidae                                   |                                |
| 21  | <i>Fungia actiniformis</i>                 | 14.0                           |
| 22  | <i>Fungia fungites</i>                     | 16.2                           |
| 23  | <i>Herpolitha limax</i>                    | 11.6                           |
|     | Merulinidae                                |                                |
| 24  | <i>Clavarina scrabacula</i>                | 2.7                            |
|     | Mussidae                                   |                                |
| 25  | <i>Lobophyllia corymbosa</i>               | 4.2                            |

|    |                               |      |
|----|-------------------------------|------|
|    | Oculinidae                    |      |
| 26 | <i>Galaxea fascicularis</i>   | 8.9  |
| 27 | <i>Galaxea</i> sp.            | 9.0  |
|    | Pectinidae                    |      |
| 28 | <i>Echinophyllia aspera</i>   | 2.5  |
| 29 | <i>Echinophyllia</i> sp.      | 4.5  |
| 30 | <i>Pectinia lactuca</i>       | 8.8  |
| 31 | <i>Oxypora lacera</i>         | 10.5 |
|    | Pocilloporidae                |      |
| 32 | <i>Stylophora pistillata</i>  | 4.0  |
| 33 | <i>Pocillipora damicornus</i> | 5.8  |
| 34 | <i>Seriatopora hystrix</i>    | 13.8 |
|    | Poriridae                     |      |
| 35 | <i>Porites andrewsi</i>       | 13.1 |
| 36 | <i>Goniopora gracilis</i>     | 45.2 |
|    | Thamnasteriidae               |      |
| 37 | <i>Psammocora contigua</i>    | 6.6  |
|    | <b>Tubipora</b>               |      |
|    | Octacollaria                  |      |
| 38 | <i>Tubipora musica</i>        | 83.0 |

\* Coral numbers to be used in other tables.

**Table S2.** Lipid composition (% of total) in the hard and soft corals from coastal waters of Vietnam (the South China Sea) [68].

| No  | Species                       | PL   | ST   | FFA | TG   | MADAG | WE+SE | Others |
|-----|-------------------------------|------|------|-----|------|-------|-------|--------|
| 1   | <i>Acropora cytherea</i>      | 16.1 | 5.7  | 1.6 | 31.8 | 3.6   | 38.9  | 2.3    |
| 2   | <i>Acropora cytherea</i>      | 24.1 | 7.6  | 1.1 | 19.1 | 1.9   | 42.8  | 3.4    |
| 3   | <i>Acropora acuminata</i>     | 14.4 | 3.8  | 2.5 | 30.4 | 2.6   | 44.3  | 2.0    |
| 4   | <i>Acropora microphthalma</i> | 18.5 | 5.5  | 2.9 | 28.0 | 0.9   | 42.2  | 2.0    |
| 5   | <i>Acropora hacinthum</i>     | 22.6 | 7.9  | 1.5 | 23.7 | 12.5  | 30.1  | 1.7    |
| 6   | <i>Acropora nobilis</i>       | 16.9 | 4.4  | 1.2 | 21.5 | 2.8   | 45.6  | 7.6    |
| 7   | <i>Acropora grandis</i>       | 11.9 | 4.6  | 1.3 | 31.4 | 8.8   | 40.4  | 1.6    |
| 8   | <i>Acropora samoensis</i>     | 23.7 | 10.0 | 1.2 | 28.6 | 1.0   | 33.9  | 1.6    |
| 9   | <i>Acropora humilis</i>       | 12.9 | 4.8  | 0.9 | 33.2 | 3.2   | 43.9  | 1.1    |
| 10  | <i>Astreopora ocelata</i>     | 12.5 | 5.0  | 0.9 | 32.9 | 6.2   | 41.1  | 1.4    |
| 11  | <i>Pavona frondifera</i>      | 25.3 | 5.8  | 1.1 | 26.3 | 4.8   | 35.7  | 1.0    |
| 12  | <i>Pavona frondifera</i>      | 17.4 | 5.2  | 1.1 | 31.5 | 6.9   | 36.4  | 1.5    |
| 13* | <i>Balanophyllia</i> sp.      | 25.4 | 12.7 | 1.9 | 10.4 | 5.4   | 42.2  | 2.0    |
| 14* | <i>Tubastrea aurea</i>        | 32.2 | 10.6 | 1.7 | 9.0  | 3.1   | 40.3  | 3.1    |
| 15  | <i>Turbinaria mesenterina</i> | 15.3 | 7.4  | 2.0 | 15.2 | 4.3   | 53.6  | 2.2    |
| 16  | <i>Turbinaria mesenterina</i> | 11.6 | 6.8  | 1.1 | 22.2 | 5.9   | 51.3  | 1.1    |
| 17  | <i>Turbinaria peltata</i>     | 12.5 | 5.9  | 1.3 | 29.1 | 6.5   | 43.0  | 1.7    |
| 18  | <i>Turbinaria peltata</i>     | 10.2 | 3.9  | 1.2 | 30.8 | 3.0   | 49.4  | 1.5    |

|      |                                |      |      |     |      |      |      |     |
|------|--------------------------------|------|------|-----|------|------|------|-----|
| 19   | <i>Turbinaria peltata</i>      | 12.1 | 3.9  | 0.6 | 29.8 | 8.1  | 44.6 | 0.9 |
| 20   | <i>Euphyllia ancora</i>        | 11.1 | 3.7  | 0.5 | 43.1 | 8.4  | 32.4 | 0.8 |
| 21   | <i>Euphyllia ancora</i>        | 19.5 | 5.4  | 0.9 | 38.4 | 6.2  | 29.6 | 0.0 |
| 22   | <i>Cyphastrea chalcidicum</i>  | 24.2 | 5.0  | 1.5 | 8.8  | 1.2  | 57.5 | 1.8 |
| 23   | <i>Cyphastrea serailia</i>     | 4.0  | 3.9  | 1.2 | 27.2 | 7.1  | 55.6 | 1.0 |
| 24   | <i>Goniastrea chinensis</i>    | 10.4 | 2.2  | 0.8 | 27.4 | 3.1  | 55.8 | 0.3 |
| 25   | <i>Goniastrea pectinata</i>    | 16.0 | 5.5  | 0.5 | 25.7 | 4.2  | 46.8 | 1.3 |
| 26   | <i>Favia lizardensis</i>       | 7.6  | 3.2  | 1.5 | 25.3 | 4.2  | 56.4 | 1.8 |
| 27   | <i>Favia maxima</i>            | 8.8  | 5.7  | 1.2 | 26.1 | 2.6  | 54.4 | 1.2 |
| 28   | <i>Favia maxima</i>            | 11.8 | 5.2  | 0.7 | 13.8 | 1.4  | 66.4 | 0.7 |
| 29   | <i>Favia maritima</i>          | 17.5 | 6.1  | 0.6 | 16.6 | 3.4  | 54.9 | 0.9 |
| 30   | <i>Favia favius</i>            | 10.1 | 10.6 | 1.5 | 32.4 | 14.5 | 29.0 | 1.9 |
| 31   | <i>Favites abdita</i>          | 17.6 | 6.5  | 0.6 | 13.8 | 1.6  | 58.7 | 1.2 |
| 32   | <i>Favites chinensis</i>       | 4.9  | 4.4  | 3.0 | 20.0 | 1.7  | 62.8 | 3.2 |
| 33   | <i>Favites flexuosa</i>        | 12.1 | 5.9  | 0.8 | 20.8 | 2.7  | 56.6 | 1.1 |
| 34   | <i>Fungia scutaria</i>         | 27.2 | 5.3  | 0.8 | 7.8  | 0.4  | 58.1 | 0.4 |
| 35   | <i>Fungia fungites</i>         | 15.8 | 4.0  | 0.4 | 17.8 | 2.8  | 58.8 | 0.4 |
| 36   | <i>Fungia scutaria</i>         | 15.4 | 4.2  | 0.5 | 25.8 | 5.1  | 48.5 | 0.5 |
| 37   | <i>Fungia scrupusa</i>         | 14.8 | 5.7  | 0.6 | 19.1 | 3.8  | 55.5 | 0.5 |
| 38   | <i>Cycloseris costulata</i>    | 12.8 | 3.3  | 0.3 | 16.9 | 4.1  | 62.4 | 0.2 |
| 39   | <i>Litophyllon undulatum</i>   | 20.3 | 5.4  | 0.9 | 20.1 | 4.7  | 47.5 | 1.1 |
| 40   | <i>Podobacia crustacean</i>    | 18.8 | 4.5  | 0.5 | 16.7 | 2.4  | 57.1 | 0.0 |
| 41   | <i>Sandalolitha robusta</i>    | 18.4 | 5.1  | 0.7 | 15.1 | 2.1  | 58.5 | 0.1 |
| 42   | <i>Echinophyllia orphensis</i> | 7.4  | 4.4  | 1.4 | 21.1 | 2.4  | 61.9 | 1.4 |
| 43   | <i>Echinophyllia ehinata</i>   | 19.8 | 5.3  | 0.8 | 8.2  | 2.7  | 62.4 | 0.8 |
| 44   | <i>Goniopora lobata</i>        | 18.4 | 6.0  | 0.8 | 10.0 | 6.7  | 57.6 | 0.5 |
| 45   | <i>Goniopora stokesi</i>       | 10.5 | 4.3  | 0.9 | 20.7 | 5.5  | 57.2 | 0.9 |
| 46   | <i>Porites lutea</i>           | 14.9 | 5.6  | 0.6 | 39.1 | 9.3  | 29.3 | 1.2 |
| 47   | <i>Porites lutea</i>           | 19.3 | 7.9  | 1.6 | 18.1 | 6.3  | 44.6 | 2.2 |
| 48   | <i>Porites solida</i>          | 15.7 | 7.5  | 0.8 | 39.7 | 9.1  | 26.4 | 0.8 |
| 49   | <i>Galaxea fascicularis</i>    | 23.9 | 7.6  | 0.5 | 25.7 | 3.1  | 35.9 | 3.3 |
| 50   | <i>Millepora dichotoma</i>     | 19.2 | 5.6  | 0.7 | 22.8 | 17.4 | 26.7 | 7.6 |
| 51   | <i>Millepora platyphylla</i>   | 15.1 | 5.4  | 0.9 | 22.0 | 18.6 | 37.1 | 0.9 |
| 52   | <i>Heliopora coerulea</i>      | 18.3 | 5.7  | 0.8 | 20.1 | 20.1 | 33.9 | 1.1 |
| 53** | <i>Carijoa riisei</i>          | 32.8 | 6.1  | 1.6 | 12.8 | 12.1 | 32.6 | 2.0 |
| 54** | <i>Carijoa riisei</i>          | 37.7 | 7.8  | 1.8 | 17.8 | 19.6 | 13.1 | 2.2 |
| 55** | <i>Klyxum molle</i>            | 27.7 | 5.5  | 1.6 | 4.9  | 14.1 | 44.4 | 1.8 |
| 56   | <i>Cladiella laciniosa</i>     | 19.9 | 5.4  | 1.5 | 3.5  | 12.5 | 55.5 | 1.7 |
| 57   | <i>Cladiella subtilis</i>      | 31.4 | 9.0  | 1.6 | 8.6  | 20.7 | 26.9 | 1.8 |
| 58   | <i>Cladiella pachyclados</i>   | 43.7 | 9.8  | 2.3 | 3.7  | 15.6 | 22.5 | 2.4 |
| 59   | <i>Lobophytum michaelae</i>    | 20.3 | 14.7 | 1.5 | 6.6  | 25.3 | 30.1 | 1.5 |

|      |                                              |      |      |     |      |      |      |      |
|------|----------------------------------------------|------|------|-----|------|------|------|------|
| 60   | <i>Lobophytum ransoni</i>                    | 33.6 | 8.1  | 1.5 | 10.0 | 20.8 | 24.4 | 1.6  |
| 61   | <i>Lobophytum batarum</i>                    | 24.3 | 5.6  | 0.8 | 7.4  | 16.0 | 38.0 | 7.9  |
| 62   | <i>Lobophytum crassum</i>                    | 35.1 | 11.9 | 1.9 | 2.4  | 14.4 | 32.7 | 1.6  |
| 63   | <i>Lobophytum</i> sp.                        | 13.7 | 12.8 | 1.8 | 10.2 | 20.5 | 39.9 | 1.1  |
| 64   | <i>Sarcophyton crassum</i>                   | 22.4 | 5.9  | 0.7 | 9.6  | 24.8 | 35.8 | 0.8  |
| 65   | <i>Sarcophyton ehrenbergi</i>                | 36.5 | 8.3  | 2.1 | 3.5  | 13.3 | 34.1 | 2.2  |
| 66   | <i>Sarcophyton</i> cf. <i>glaucum</i>        | 16.0 | 3.9  | 0.5 | 9.5  | 21.5 | 48.1 | 0.5  |
| 67   | <i>Sarcophyton regulare</i>                  | 34.9 | 9.0  | 1.5 | 11.3 | 14.6 | 27.3 | 1.4  |
| 68   | <i>Sarcophyton cinereum</i>                  | 40.0 | 9.1  | 1.5 | 5.0  | 15.6 | 26.9 | 1.9  |
| 69   | <i>Sarcophyton spongiosum</i>                | 22.4 | 7.0  | 1.4 | 9.7  | 12.6 | 35.4 | 11.5 |
| 70   | <i>Sarcophyton</i> sp.                       | 18.6 | 4.1  | 0.8 | 7.8  | 19.5 | 48.1 | 1.1  |
| 71   | <i>Sinularia</i> cf. <i>robusta</i>          | 33.2 | 4.9  | 2.0 | 4.6  | 18.8 | 33.6 | 2.9  |
| 72   | <i>Sinularia</i> aff. <i>exilis</i>          | 24.4 | 4.9  | 1.5 | 6.0  | 25.2 | 36.0 | 2.0  |
| 73   | <i>Sinularia brassica</i>                    | 32.6 | 6.9  | 1.4 | 4.8  | 17.1 | 35.7 | 1.5  |
| 74   | <i>Sinularia brassica</i>                    | 34.6 | 6.9  | 1.7 | 5.3  | 14.2 | 35.7 | 1.6  |
| 75   | <i>Sinularia erecta</i>                      | 30.0 | 10.6 | 1.5 | 9.7  | 19.9 | 25.9 | 2.4  |
| 76   | <i>Sinularia</i> aff. <i>polydactyla</i>     | 37.4 | 9.6  | 1.5 | 9.1  | 16.7 | 23.3 | 2.4  |
| 77   | <i>Sinularia siaesensis</i>                  | 18.9 | 6.4  | 1.2 | 5.3  | 30.7 | 35.8 | 1.7  |
| 78   | <i>Sinularia siaesensis</i>                  | 21.4 | 2.7  | 0.4 | 3.7  | 18.0 | 51.9 | 1.9  |
| 79   | <i>Sinularia. gibberosa</i>                  | 25.5 | 5.0  | 1.3 | 7.9  | 32.7 | 25.5 | 2.1  |
| 80   | <i>Sinularia</i> sp.                         | 30.0 | 6.7  | 2.1 | 11.1 | 19.3 | 28.7 | 2.1  |
| 81   | <i>Sinularia. polydactyla</i>                | 45.9 | 18.0 | 1.4 | 8.6  | 4.1  | 20.6 | 1.4  |
| 82   | <i>Sinularia flexibilis</i>                  | 50.7 | 20.3 | 1.1 | 4.2  | 3.4  | 19.2 | 1.1  |
| 83*  | <i>Dendronephthya</i> cf. <i>cervicornis</i> | 45.9 | 17.6 | 1.3 | 8.9  | 6.4  | 18.5 | 1.4  |
| 84*  | <i>Dendronephthya</i> sp.                    | 31.7 | 5.8  | 1.7 | 9.7  | 17.5 | 31.7 | 1.9  |
| 85*  | <i>Dendronephthya</i> cf. <i>pulchella</i>   | 29.2 | 6.3  | 1.2 | 10.4 | 14.6 | 36.8 | 1.5  |
| 86   | <i>Lemnalia</i> cf. <i>exilis</i>            | 19.7 | 6.1  | 1.4 | 21.4 | 11.0 | 38.9 | 1.5  |
| 87   | <i>Lemnalia</i> cf. <i>peristyla</i>         | 28.7 | 8.8  | 1.7 | 14.6 | 14.2 | 30.1 | 1.9  |
| 88   | <i>Lemnalia capnelliiformis</i>              | 43.3 | 13.4 | 1.6 | 21.2 | 13.0 | 7.0  | 0.5  |
| 89   | <i>Nephthea</i> sp.                          | 43.0 | 7.1  | 2.3 | 8.6  | 7.5  | 27.2 | 4.3  |
| 90   | <i>Nephthea</i> sp.                          | 40.3 | 20.8 | 1.4 | 3.4  | 6.7  | 25.0 | 2.4  |
| 91*  | <i>Siphonogorgia variabilis</i>              | 42.9 | 17.0 | 2.0 | 4.4  | 7.5  | 26.0 | 0.2  |
| 92*  | <i>Siphonogorgia</i> cf. <i>harrisoni</i>    | 30.1 | 11.2 | 1.5 | 21.4 | 16.8 | 17.5 | 1.5  |
| 93*  | <i>Siphonogorgia</i> cf. <i>harrisoni</i>    | 35.6 | 11.1 | 1.0 | 18.7 | 17.0 | 15.5 | 1.1  |
| 94*  | <i>Annella mollis</i>                        | 41.9 | 14.7 | 2.1 | 5.5  | 5.4  | 23.5 | 6.9  |
| 95*  | <i>Annella mollis</i>                        | 44.0 | 13.9 | 2.5 | 14.1 | 7.0  | 15.8 | 2.7  |
| 96*  | <i>Mopsella</i> sp.                          | 30.0 | 9.2  | 1.7 | 13.9 | 20.0 | 23.5 | 1.7  |
| 97*  | <i>Mopsella</i> cf. <i>spinosa</i>           | 40.2 | 12.3 | 1.9 | 6.0  | 11.1 | 26.0 | 2.5  |
| 98*  | <i>P.</i> cf. <i>minor</i>                   | 36.4 | 7.3  | 1.5 | 6.5  | 9.5  | 33.7 | 5.1  |
| 99*  | <i>Menella</i> cf. <i>praelonga</i>          | 42.2 | 14.3 | 1.4 | 5.7  | 10.7 | 24.3 | 1.4  |
| 100* | <i>Menella</i> cf. <i>praelonga</i>          | 47.5 | 14.2 | 3.0 | 8.5  | 9.9  | 13.7 | 3.2  |

|       |                                    |      |      |     |      |      |      |     |
|-------|------------------------------------|------|------|-----|------|------|------|-----|
| 101*  | <i>Menella flora</i>               | 27.1 | 9.7  | 1.5 | 7.1  | 8.0  | 46.6 | 0.0 |
| 102*  | <i>Echinogorgia cf. gracillima</i> | 31.6 | 9.7  | 1.1 | 9.7  | 34.6 | 12.1 | 1.2 |
| 103*  | <i>Paracis cf. horrida</i>         | 18.6 | 5.9  | 0.6 | 13.4 | 51.9 | 9.3  | 0.3 |
| 104   | <i>Hicksonella princeps</i>        | 19.3 | 5.1  | 1.0 | 11.0 | 14.1 | 48.5 | 1.0 |
| 105   | <i>Hicksonella princeps</i>        | 27.1 | 10.3 | 1.5 | 12.3 | 13.9 | 33.3 | 1.6 |
| 106*  | <i>Viminella cf. petila</i>        | 53.7 | 11.9 | 1.6 | 7.4  | 5.4  | 19.0 | 1.0 |
| 107*  | <i>Viminella cf. crassa</i>        | 15.8 | 5.9  | 2.0 | 5.8  | 18.0 | 50.3 | 2.2 |
| 108** | <i>Narella sp.</i>                 | 41.1 | 14.0 | 1.1 | 13.2 | 9.8  | 18.8 | 2.0 |
| 109** | Plexauridae spp. 1                 | 58.8 | 8.6  | 1.4 | 11.2 | 5.7  | 12.9 | 1.4 |
| 110** | Plexauridae spp. 2                 | 25.6 | 10.6 | 2.4 | 1.9  | 7.5  | 49.6 | 2.4 |

\* Species without zooxanthellae. \*\* No data on zooxanthellae presence. Coral numbers to be used in other tables.

**Table S3.** Hydrocarbon's composition (weight % of the sum) in Caribbean corals [32]. Isoprenoid hydrocarbons: pristane (Pr), phytane (Ph) and squalene (Sq). na – no analysis.

| Order and species           |  | <i>n</i> -Alkanes |      |     |      |     |     |     |     |     |      |      |     |     |      |     | Isoprenoids |     |      |
|-----------------------------|--|-------------------|------|-----|------|-----|-----|-----|-----|-----|------|------|-----|-----|------|-----|-------------|-----|------|
|                             |  | C16               | C17  | C18 | C19  | C20 | C21 | C22 | C23 | C24 | C25  | C26  | C27 | C28 | C29  | C30 | Pr          | Ph  | Sq   |
| Pocilloporidae              |  |                   |      |     |      |     |     |     |     |     |      |      |     |     |      |     |             |     |      |
| <i>Madracis decactis</i>    |  | 1.5               | 3.0  | 1.3 | 0.7  | 1.3 | 0.4 | 1.2 | 3.8 | 8.3 | 11.6 | 9.8  | 5.8 | 3.1 | 2.2  | 0.8 | -           | 0.5 | 5.5  |
| <i>Madracis decactis</i>    |  | 3.9               | 6.2  | 5.2 | 4.1  | 1.8 | 0.8 | 0.8 | 1.5 | 0.5 | 1.2  | 0.5  | 0.6 | -   | -    | -   | 4.6         | 3.2 | 0.4  |
| <i>Madracis decactis</i>    |  | 1.2               | 3.2  | 2.0 | 2.2  | 0.6 | 0.4 | 0.4 | 0.7 | -   | -    | 0.9  | 0.8 | 1.3 | 4.7  | 3.9 |             | 1.2 | 0.7  |
| <i>Madracis decactis</i>    |  | 5.9               | 10.3 | 4.6 | 12.8 | 0.9 | 0.4 | 0.1 | 0.2 | 0.6 | 1.1  | 0.5  | -   | 0.1 | -    | 0.1 | 8.0         | 4.7 | 6.3  |
| <i>Madracis mirabilis</i>   |  | 2.2               | 13.0 | 4.2 | 3.7  | 1.6 | 0.9 | 1.5 | 2.0 | 3.1 | 4.5  | 8.8  | 1.8 | 3.5 | 1.1  | 1.3 | 4.2         | 2.1 | 1.2  |
| Agariciidae                 |  |                   |      |     |      |     |     |     |     |     |      |      |     |     |      |     |             |     |      |
| <i>Agaricia agaricites</i>  |  | 4.8               | 5.5  | 3.6 | 2.7  | 1.0 | 0.6 | 0.6 | 0.6 | 0.6 | 1.6  | 0.7  | 0.8 | 0.1 | 1.1  | 0.5 | 3.0         | 1.7 | na   |
| <i>Helioseris cucullata</i> |  | 8.8               | 12.7 | 8.3 | 5.5  | 2.2 | 1.3 | 1.6 | 1.8 | 2.3 | 3.5  | 2.3  | 1.9 | 2.2 | 2.1  | 1.4 | 6.1         | 3.7 | na   |
| Poritidae                   |  |                   |      |     |      |     |     |     |     |     |      |      |     |     |      |     |             |     |      |
| <i>Porites astreoides</i>   |  | 3.1               | 6.3  | 3.6 | -    | -   | -   | -   | -   | -   | 80.0 | -    | -   | -   | -    | -   | 4.1         | -   | 6.2  |
| <i>Porites porites</i>      |  | 0.4               | 3.1  | 2.6 | 2.6  | 0.4 | -   | -   | 1.6 | -   | 54.7 | -    | -   | 2.5 | -    | 1.7 | 2.8         | 1.6 | 1.0  |
| <i>Porites divaricata</i>   |  | 1.2               | 4.8  | 2.6 | 2.3  | 2.4 | -   | 0.4 | 0   | 0.3 | -    | 0.8  | -   | 1.2 | 12.5 | 1.6 | 2.2         | 1.4 | -    |
| <i>Porites divaricata</i>   |  | 2.0               | 7.2  | 2.3 | 3.1  | -   | 0.4 | 2.0 | 3.4 | 4.3 | 4.8  | 4.7  | 4.2 | 6.2 | 5.8  | 4.4 | 3.4         | 2.4 | 0.4  |
| <i>Porites divaricata</i>   |  | 4.8               | 15.2 | 6.0 | 3.7  | 3.2 | 0.4 | 1.8 | 0.3 | 1.8 | -    | 2.1  | -   | 1.1 | 7.4  | 5.1 | 5.4         | 3.4 | 1.9  |
| <i>Porites furcata</i>      |  | 1.9               | 4.4  | 1.3 | 0.9  | 1.5 | 0.8 | 2.1 | 5.4 | 7.5 | 8.6  | 6.9  | 6.3 | 3.5 | 2.2  | 1.2 | 0.9         | 0.5 | 10.6 |
| <i>Porites furcata</i>      |  | 8.8               | 14.4 | 8.5 | -    | -   | -   | -   | -   | -   | 61.8 | -    | -   | -   | -    | -   | -           | -   | 2.2  |
| Faviidae                    |  |                   |      |     |      |     |     |     |     |     |      |      |     |     |      |     |             |     |      |
| <i>Manicina areolata</i>    |  | -                 | 6.6  | 4.2 | 3.9  | -   | -   | -   | 2.2 | 3.4 | 40.7 | 4.4  | 4.0 | 2.8 | 3.0  | 4.6 | 4.4         | 2.3 | 3.5  |
| <i>Montastrea annularis</i> |  | 5.3               | 5.9  | 4.9 | 3.0  | 3.2 | 0.8 | 0.9 | 0.4 | 1.2 | 1.5  | 1.6  | 0.6 | 1.0 | 2.6  | -   | 4.1         | 2.3 | 0.7  |
| <i>Solenastrea hyades</i>   |  | 0.4               | 1.0  | 0.4 | 0.2  | 0.2 | -   | 0.2 |     | 1.2 | 1.4  | 10.8 | 0.8 | -   | -    | -   | 5.5         | 4.0 | 1.4  |
| <i>Solenastrea hyades</i>   |  | 3.0               | 3.4  | 2.2 | 2.1  | 1.0 | 0.4 | 1.5 | 0.8 | 2.0 | 3.6  | 1.7  | -   |     | 4.5  | 4.4 | 1.8         | 1.4 | 3.0  |
| Oculinidae                  |  |                   |      |     |      |     |     |     |     |     |      |      |     |     |      |     |             |     |      |
| <i>Oculina diffusa</i>      |  | -                 | 5.0  | 0.7 | 6.0  | 3.8 | 1.2 | 1.8 | 0.5 | 1.4 | -    | 1.1  | 1.0 | 0.6 | -    | 2.5 | 3.9         | -   | 1.4  |

|                              |  |     |      |     |     |     |     |     |     |     |     |     |     |     |     |     |     |     |      |
|------------------------------|--|-----|------|-----|-----|-----|-----|-----|-----|-----|-----|-----|-----|-----|-----|-----|-----|-----|------|
| Meandrinidae                 |  |     |      |     |     |     |     |     |     |     |     |     |     |     |     |     |     |     |      |
| <i>Dichocoenia stokesii</i>  |  | 2.4 | 1.8  | 2.5 | 1.2 | na  | 6.6 | 4.3 | 1.1  |
| Mussidae                     |  |     |      |     |     |     |     |     |     |     |     |     |     |     |     |     |     |     |      |
| <i>Mussa angulosa</i>        |  | 1.5 | 25.3 | 2.5 | 4.0 | 1.1 | 0.9 | 0.7 | 0.7 | 0.9 | 0.3 | 0.5 | -   | 0.3 | -   | 0.1 | 0.9 | 1.2 | na   |
| <i>Scolymia lacera</i>       |  | 0.2 | 0.7  | -   | 0.2 | 0.6 | -   | -   | -   | -   | -   | -   | -   | -   | -   | -   | -   | -   | 0.2  |
| <i>Isophyllia sinuosa</i>    |  | 0.3 | 2.9  | 0.5 | 0.5 | 0.2 | 0.1 | 0.1 | 0.1 | 0.2 | -   | -   | -   | -   | -   | -   | 0.2 | 0.2 | na   |
| <i>Isophyllastrea rigida</i> |  | 1.0 | 13.7 | 3.7 | 5.8 | 1.3 | 0.6 | 0.6 | 0.7 | 1.2 | 2.3 | 0.5 | -   | -   | -   | 0.6 | 1.9 | 2.2 | na   |
| <i>Mycetophyllia ferox</i>   |  | 0.2 | 0.9  | 2.0 | 2.2 | 1.0 | 0.8 | 0.9 | 1.6 | 1.3 | 4.4 | 1.0 | 4.3 | 0.7 | 1.7 | 0.2 | -   | 0.8 | na   |
| Milleporidae                 |  |     |      |     |     |     |     |     |     |     |     |     |     |     |     |     |     |     |      |
| <i>Millepora alcicornis</i>  |  | 2.2 | 3.5  | 2.1 | 1.6 | 1.3 | 0.2 | 0.8 | 0.3 | 1.0 | 1.4 | 1.2 | 2.0 | 0.6 | 2.1 | 1.9 | 2.2 | 0.6 | -    |
| <i>Millepora alcicornis</i>  |  | 3.1 | 3.0  | 2.2 | 1.0 | 1.2 | 0.2 | 2.0 | 0.5 | 2.2 | -   | 1.5 | -   | -   | 3.2 | 1.9 | 2.4 | 1.3 | 27.4 |
| <i>Millepora alcicornis</i>  |  | 2.5 | 7.1  | 2.2 | 1.5 | 1.1 | 0.4 | 1.1 | 0.8 | 1.6 | 1.3 | 1.6 | 2.1 | 1.7 | 2.4 | 2.9 | 1.1 | 1.0 | 0.9  |

**Table S4.** Composition of coral wax FA (% of total FA), collected at the Great Barrier Reef (Australia) [33]. Numeration of the coral species is as in the Table 1.

| No | Fatty acids |      |      |               |               |      |      |      |      |      |      |
|----|-------------|------|------|---------------|---------------|------|------|------|------|------|------|
|    | 14:0        | 16:1 | 16:0 | 18:4+<br>18:5 | 18:2+<br>18:3 | 18:1 | 18:0 | 20:U | 20:0 | 22:U | 22:0 |
| 1  | 1.1         | 1.3  | 46.8 | 7.0           | 0.8           | 7.4  | 7.2  | 8.3  | -    | 9.9  | -    |
| 2  | -           | -    | 37.4 | 8.2           | -             | 2.5  | 4.3  | 6.5  | -    | 41.0 | -    |
| 3  | 4.7         | 2.4  | 78.3 | 3.6           | 1.4           | 2.5  | 3.8  | 1.1  | 0.4  | 1.0  | 6.3  |
| 4  | -           | -    | 50.6 | -             | -             | 4.8  | 6.6  | 1.5  | -    | 36.6 | -    |
| 5  | -           | -    | 77.2 | 3.8           | 4.4           | -    | 14.6 | -    | -    | -    | -    |
| 6  | 1.8         | 2.0  | 66.1 | 0.9           | 0.6           | 6.5  | 13.7 | 3.9  | 1.1  | 3.1  | 0.2  |
| 7  | -           | 14.3 | 17.3 | 0.6           | -             | 62.2 | 2.8  | 2.8  | 0.6  | -    | -    |
| 8  | -           | 15.0 | 15.8 | 0.4           | -             | 58.2 | 2.5  | 6.0  | -    | -    | -    |
| 9  | 7.6         | 1.4  | 75.2 | 0.4           | 0.4           | 5.0  | 7.4  | 0.6  | 1.0  | 0.7  | 0.2  |
| 10 | 4.7         | 1.3  | 31.7 | 0.4           | -             | 57.0 | 4.3  | 0.5  | 0.2  | -    | -    |
| 11 | 8.4         | 3.0  | 63.4 | 3.7           | 1.2           | 7.1  | 7.0  | 2.4  | 0.7  | 3.0  | 0.2  |
| 12 | -           | -    | 72.6 | 0.8           | 2.7           | 12.6 | 7.2  | 0.3  | 1.2  | 2.0  | 0.6  |
| 13 | 13.0        | 2.5  | 59.5 | 2.1           | 0.3           | 20.3 | 2.4  | -    | -    | -    | -    |
| 14 | 9.0         | 5.0  | 79.3 | 1.6           | 2.6           | -    | 2.4  | -    | -    | -    | -    |
| 15 | 1.1         | 0.9  | 61.7 | 1.6           | -             | 19.4 | 6.9  | 1.5  | -    | 7.0  | -    |
| 16 | -           | 2.1  | 57.4 | 4.2           | 8.6           | -    | 12.7 | 4.9  | 0.4  | 9.8  | -    |
| 17 | -           | -    | 1.8  | 2.2           | -             | 2.4  | 14.7 | 18.6 | -    | 60.2 | -    |
| 18 | 0.5         | 4.1  | 55.0 | 5.0           | 1.2           | 14.1 | 7.9  | 5.7  | 0.3  | 6.2  | -    |
| 19 | 2.2         | 2.2  | 68.2 | 3.9           | 1.2           | 6.9  | 8.2  | 1.9  | 0.7  | 4.5  | 0.1  |
| 20 | -           | 3.4  | 76.9 | 7.8           | -             | 2.1  | 8.6  | -    | -    | 1.1  | -    |
| 21 | 3.7         | 1.1  | 62.7 | 2.9           | 0.3           | 5.5  | 18.3 | 3.4  | 1.3  | 0.8  | -    |
| 22 | 7.1         | 5.1  | 68.5 | 6.8           | 1.1           | 7.0  | 4.1  | 1.1  | 0.1  | 0.1  | -    |



**Table S6.** Fatty acid composition (% of total) of triacylglycerols from corals collected at the Great Barrier Reef (Australia) [33]. Numeration of the coral species as in the Table 1.

| No. | Fatty acids |      |      |               |               |      |      |      |      |      |      |
|-----|-------------|------|------|---------------|---------------|------|------|------|------|------|------|
|     | 14:0        | 16:1 | 16:0 | 18:4+<br>18:5 | 18:2+<br>18:3 | 18:1 | 18:0 | 20:U | 20:0 | 22:U | 22:0 |
| 1   | 6.0         | 5.5  | 44.9 | 4.9           | 0.9           | 11.6 | 6.0  | 10.4 | 0.6  | 8.3  | 1.0  |
| 2   | 1.0         | 4.1  | 62.7 | 8.9           | 0.6           | 5.6  | 6.7  | -    | 0.5  | 9.7  | -    |
| 3   | 9.3         | 2.1  | 63.1 | 9.2           | 1.4           | 2.9  | 3.8  | 3.6  | 0.4  | 4.4  | -    |
| 4   | 3.2         | 4.3  | 63.5 | 12.4          | 2.9           | 3.7  | 3.7  | 3.8  | -    | 2.4  | -    |
| 5   | 1.5         | -    | 59.5 | 11.0          | 1.2           | 5.5  | 14.9 | 4.9  | 1.6  | -    | -    |
| 6   | 2.4         | 2.3  | 65.5 | 3.7           | 0.8           | 7.9  | 8.1  | 4.5  | 1.4  | 3.3  | -    |
| 7   | 1.4         | 1.9  | 37.8 | 0.4           | 0.9           | 17.8 | 18.7 | 2.1  | 0.2  | 16.8 | 2.2  |
| 8   | 1.3         | 4.5  | 33.9 | 0.3           | 2.3           | 17.2 | 11.0 | 2.0  | 0.9  | 20.0 | 1.9  |
| 9   | 3.5         | -    | 57.8 | 7.7           | 1.9           | 10.7 | 6.7  | 9.5  | 0.3  | 2.0  | -    |
| 10  | 7.1         | 8.7  | 61.8 | 5.4           | -             | 7.6  | 8.0  | 1.4  | -    | -    | -    |
| 11  | 12.6        | 4.2  | 66.9 | 4.4           | 2.8           | 2.7  | 5.3  | 1.1  | -    | 0.1  | -    |
| 12  | 5.7         | 5.5  | 76.8 | 3.0           | 4.6           | -    | 4.4  | -    | -    | -    | -    |
| 13  | 9.6         | 4.4  | 68.8 | 5.0           | 7.5           | -    | 4.7  | -    | -    | -    | -    |
| 14  | 4.4         | 4.6  | 66.1 | 10.5          | 0.3           | 4.5  | 5.0  | 0.2  | -    | 4.4  | -    |
| 15  | 1.7         | 2.4  | 61.7 | 6.2           | 0.5           | 17.0 | 8.5  | 1.8  | -    | 0.3  | -    |
| 16  | 1.0         | 3.2  | 58.0 | 2.3           | 2.0           | 5.8  | 9.4  | 6.8  | -    | 10.0 | 3.3  |
| 17  | 2.0         | 3.5  | 54.8 | 6.5           | -             | 6.3  | 11.2 | 8.9  | 0.6  | 6.4  | -    |
| 18  | 1.7         | 2.1  | 59.7 | 4.5           | 0.4           | 9.0  | 12.0 | 6.1  | 0.5  | 4.2  | -    |
| 19  | 2.5         | 3.8  | 58.0 | 6.4           | 0.9           | 7.5  | 6.2  | 6.4  | 0.9  | 7.3  | 0.2  |
| 20  | 1.5         | -    | 68.1 | 9.8           | 0.4           | 4.2  | 9.5  | 4.2  | -    | 2.4  | -    |
| 21  | 6.3         | 4.2  | 73.1 | 5.1           | 4.5           | -    | 6.8  | -    | -    | -    | -    |
| 22  | 1.7         | 3.6  | 57.2 | 12.1          | 1.0           | 6.9  | 5.1  | 5.7  | 0.4  | 6.2  | -    |
| 23  | 6.1         | 1.8  | 60.6 | 7.9           | 1.2           | 6.9  | 6.8  | 4.0  | 0.6  | 4.2  | -    |
| 24  | 0.6         | 2.3  | 39.7 | 7.8           | 0.4           | 41.6 | 6.7  | 0.9  | -    | -    | -    |
| 25  | 0.3         | 1.4  | 35.4 | 1.0           | -             | 53.8 | 5.5  | 1.4  | -    | 1.1  | -    |
| 26  | 1.3         | 6.4  | 50.2 | 17.3          | 4.0           | 5.8  | 4.7  | 4.4  | 0.3  | 5.5  | 0.1  |
| 27  | 1.4         | 5.8  | 64.9 | 7.7           | 2.7           | 5.0  | 4.3  | 3.1  | 0.3  | 4.7  | 0.1  |
| 28  | 4.6         | 7.2  | 73.5 | 2.8           | -             | 6.2  | 5.8  | -    | -    | -    | -    |
| 29  | 2.8         | 2.4  | 41.0 | 7.4           | 15.4          | 0.7  | 8.5  | 10.0 | 0.4  | 11.4 | -    |
| 30  | 2.3         | 3.0  | 60.2 | 7.1           | 4.5           | 1.9  | 9.6  | 6.5  | 0.7  | 4.0  | -    |
| 31  | 3.5         | 5.3  | 71.4 | 5.6           | 1.2           | 1.8  | 6.1  | 3.0  | 0.2  | 2.0  | -    |
| 32  | 6.6         | 5.2  | 43.4 | 2.0           | 1.6           | 10.2 | 7.4  | 7.0  | 0.3  | 16.4 | -    |
| 33  | 4.3         | 2.6  | 49.5 | 6.3           | -             | 4.3  | 6.5  | 4.7  | 0.3  | 21.3 | 0.2  |
| 34  | 6.0         | 4.8  | 48.0 | 1.5           | 1.2           | 9.9  | 4.6  | 7.9  | 0.3  | 15.9 | -    |
| 35  | 1.9         | 0.6  | 53.5 | 2.7           | 0.5           | 26.7 | 8.2  | 1.1  | -    | 4.9  | -    |
| 36  | 8.0         | 2.9  | 66.7 | 6.2           | 1.0           | 6.9  | 6.7  | 1.4  | -    | 0.3  | -    |
| 37  | -           | 5.4  | 41.3 | 7.0           | -             | 5.8  | 13.4 | -    | 0.9  | 12.7 | 0.2  |



|    |     |     |      |     |     |     |     |     |   |     |   |
|----|-----|-----|------|-----|-----|-----|-----|-----|---|-----|---|
| 38 | 3.2 | 2.1 | 57.7 | 7.0 | 2.0 | 7.9 | 6.8 | 6.8 | - | 6.5 | - |
|----|-----|-----|------|-----|-----|-----|-----|-----|---|-----|---|

**Table S7.** Fatty acid composition (% of total) of triacylglycerols of cnidarians, Okinawa Is., Japan [36].

| Fatty acids | <i>Pocillopora damicornis</i> | <i>Pocillopora verrucosa</i> | <i>Stylophora pistillata</i> | <i>Montipora aequituberculata</i> | <i>Acropora microphthalma</i> | <i>Porites lutea</i> | <i>Porites cylindrica</i> | <i>Fungia fungites</i> | <i>Galaxea fascicularis</i> | <i>Goniastrea aspera</i> | <i>Oulastrea crispata</i> | <i>Tubastrea</i> sp. | <i>Lobophytum crassum</i> | <i>Millepora murrayi</i> |
|-------------|-------------------------------|------------------------------|------------------------------|-----------------------------------|-------------------------------|----------------------|---------------------------|------------------------|-----------------------------|--------------------------|---------------------------|----------------------|---------------------------|--------------------------|
| 14:0        | 5.6                           | 7.9                          | 6.3                          | 2.2                               | 4.3                           | 0.9                  | 1.2                       | 1.7                    | 3.9                         | 1.2                      | 8.6                       | 4.2                  | 1.4                       | 8.4                      |
| 16:0        | 51.3                          | 63.2                         | 57.7                         | 79.8                              | 57.9                          | 49.8                 | 61.8                      | 64.5                   | 55.6                        | 66.3                     | 50.2                      | 48.1                 | 67.0                      | 48.9                     |
| 16:1n-7     | 3.0                           | 2.7                          | 4.1                          | 2.4                               | 3.3                           | 0.9                  | 1.0                       | 1.7                    | 3.0                         | 1.1                      | 5.4                       | 4.4                  | 5.2                       | 0.2                      |
| 18:0        | 7.4                           | 6.6                          | 5.0                          | 5.8                               | 8.7                           | 8.1                  | 9.0                       | 8.7                    | 5.2                         | 10.3                     | 5.3                       | 15.7                 | 8.8                       | 32.7                     |
| 18:1n-9     | 6.0                           | 6.2                          | 13.5                         | 3.0                               | 6.6                           | 21.6                 | 17.9                      | 7.0                    | 6.3                         | 4.6                      | 16.1                      | 5.1                  | 3.4                       | 3.4                      |
| 18:2n-6     | 1.2                           | 0.6                          | 1.0                          | 0.4                               | 0.8                           | 0.7                  | 1.0                       | 0.8                    | 1.6                         | 0.6                      | 0.0                       | 0.0                  | 0.7                       | 0.6                      |
| 18:3n-6     | 3.0                           | 1.0                          | 0.6                          | 0.0                               | 6.2                           | 3.5                  | 1.2                       | 5.9                    | 13.2                        | 2.4                      | 0.0                       | 0.0                  | 0.0                       | 0.5                      |
| 18:4n-3     | 0.9                           | 0.0                          | 0.3                          | 0.7                               | 0.0                           | 0.1                  | 1.1                       | 1.2                    | 2.2                         | 0.4                      | 0.0                       | 0.0                  | 0.0                       | 0.7                      |
| 20:0        | 1.8                           | 0.8                          | 0.4                          | 0.3                               | 1.3                           | 0.3                  | 0.2                       | 0.5                    | 0.3                         | 0.8                      | 0.5                       | 0.8                  | 0.6                       | 2.0                      |
| 20:1        | 4.3                           | 4.0                          | 2.0                          | 1.1                               | 2.8                           | 1.3                  | 0.6                       | 0.9                    | 0.1                         | 1.3                      | 2.2                       | 2.5                  | 0.0                       | 0.0                      |
| 20:2        | 1.5                           | 0.6                          | 0.9                          | 0.6                               | 0.4                           | 0.7                  | 0.5                       | 0.0                    | 0.3                         | 0.8                      | 1.8                       | 1.1                  | 0.0                       | 0.0                      |
| 20:3n-6     | 2.5                           | 2.3                          | 1.6                          | 0.0                               | 1.7                           | 0.5                  | 0.2                       | 1.5                    | 2.7                         | 0.8                      | 0.0                       | 0.0                  | 0.0                       | 0.0                      |
| 20:4n-3     | 2.7                           | 0.0                          | 1.4                          | 0.0                               | 0.4                           | 0.3                  | 0.2                       | 0.2                    | 0.2                         | 0.1                      | 0.0                       | 0.0                  | 0.0                       | 0.0                      |
| 20:4n-6     | 0.1                           | 0.0                          | 0.1                          | 0.0                               | 0.4                           | 1.6                  | 0.8                       | 1.0                    | 0.9                         | 1.3                      | 0.3                       | 0.4                  | 0.0                       | 0.0                      |
| 20:5n-3     | 0.4                           | 0.0                          | 0.7                          | 0.0                               | 1.2                           | 3.3                  | 1.5                       | 0.0                    | 0.5                         | 0.1                      | 0.4                       | 1.1                  | 0.3                       | 0.0                      |
| 22:0        | 0.2                           | 1.2                          | 0.0                          | 0.0                               | 0.0                           | 0.2                  | 0.1                       | 0.4                    | 0.1                         | 0.0                      | 0.1                       | 0.0                  | 0.2                       | 0.0                      |
| 22:1        | 0.7                           | 0.0                          | 0.5                          | 0.0                               | 0.3                           | 0.3                  | 0.1                       | 0.4                    | 0.1                         | 1.2                      | 1.5                       | 0.8                  | 0.0                       | 0.0                      |
| 22:4n-3     | 0.4                           | 0.0                          | 0.1                          | 0.0                               | 0.2                           | 0.7                  | 0.2                       | 0.0                    | 0.2                         | 0.3                      | 0.4                       | 0.2                  | 0.0                       | 0.0                      |
| 22:5n-3     | 0.6                           | 0.4                          | 0.8                          | 0.4                               | 0.7                           | 1.0                  | 0.4                       | 0.2                    | 0.2                         | 0.3                      | 0.0                       | 1.9                  | 0.2                       | 0.4                      |
| 22:6n-3     | 3.9                           | 0.0                          | 2.0                          | 0.0                               | 1.4                           | 3.2                  | 0.8                       | 0.0                    | 1.5                         | 0.3                      | 0.4                       | 0.2                  | 0.0                       | 0.0                      |

**Table S8.** FA composition (% of total) of lipids of the soft coral *Sinularia* sp. from the coast waters of Vietnam [79].

| Fatty acids | Triacylglycerols | Monoalkyldiacylglycerols | Lipids |         |       |
|-------------|------------------|--------------------------|--------|---------|-------|
|             |                  |                          | Total  | Neutral | Polar |
| 14:0        | 1.3              | 1.6                      | 2.3    | 1.9     | 2.4   |
| 16:0        | 47.4             | 42.8                     | 47.0   | 38.3    | 24.3  |
| 16:1n-9     | 0.5              | 0.6                      | 0.4    | 0.5     | 0.3   |
| 16:1n-7     | 2.6              | 3.0                      | 3.0    | 3.8     | 2.1   |
| 16:2n-7     | 6.3              | 6.6                      | 5.2    | 7.6     | 3.3   |
| 16:3n-4     | 1.0              | 1.3                      | 1.7    | 2.0     | 6.3   |
| 16:4n-1     | -                | 0.7                      | 0.6    | 0.4     | 2.3   |
| 18:0        | 10.2             | 12.5                     | 10.7   | 8.2     | 7.2   |

|         |      |     |     |     |      |
|---------|------|-----|-----|-----|------|
| 18:1n-9 | 7.3  | 4.1 | 4.8 | 5.9 | 3.8  |
| 18:1n-7 | 0.9  | 0.9 | 0.8 | 0.9 | 0.8  |
| 18:2n-9 | 0.6  | 0.9 | 0.6 | 0.8 | -    |
| 18:2n-7 | 2.0  | 4.1 | 2.8 | 4.2 | 0.7  |
| 18:2n-6 | 11.5 | 0.9 | 4.0 | 6.2 | 1.9  |
| 18:3n-6 | 0.9  | 2.7 | 1.3 | 2.1 | -    |
| 18:3n-3 | 0.9  | 0.4 | 0.5 | 0.8 | 0.6  |
| 18:4n-3 | 0.8  | 1.2 | 1.4 | 1.4 | 14.1 |
| 20:0    | 0.7  | 1.0 | 0.9 | 0.6 | 0.3  |
| 20:3n-6 | -    | 0.7 | 0.3 | 0.4 | 0.2  |
| 20:4n-6 | 0.8  | 6.3 | 4.2 | 5.2 | 9.0  |
| 20:4n-3 | 0.5  | 1.8 | 0.8 | 1.3 | 0.2  |
| 20:5n-3 | 0.4  | 0.8 | 0.5 | 0.5 | 3.9  |
| 22:0    | 0.5  | 0.8 | 0.7 | 0.4 | 0.2  |
| 22:4n-6 | -    | -   | 0.1 | -   | 0.6  |
| 22:6n-3 | 1.3  | 1.2 | 1.0 | 1.5 | 2.3  |
| 24:5n-6 | 0.1  | 0.2 | 1.7 | 2.0 | 9.5  |
| 24:6n-3 | 0.1  | 0.1 | 0.7 | 1.0 | 1.0  |

**Table S9.** The FA composition (%) of the total lipids of Caribbean corals [32].

| Family, species                   | 12:0 | 14:0 | 16:0 | 16:1 | 18:0 | 18:1 | 20:0 | 20:1 | 20:5 | 22:0 | 22:1 | 22:5 | 22:6 | 24:0 | 24:1 |
|-----------------------------------|------|------|------|------|------|------|------|------|------|------|------|------|------|------|------|
| Pocilloporidae                    |      |      |      |      |      |      |      |      |      |      |      |      |      |      |      |
| <i>Madracis decactis</i>          | 0.5  | 4.7  | 40.4 | tr   | 8.0  | 13.4 | 3.9  | tr   | 0.7  | tr   | 3.1  | 5.0  | 20.3 | -    | -    |
| <i>Madracis decactis</i>          | 0.3  | 4.5  | 38.3 | 12.6 | 11.2 | 9.6  | -    | -    | 3.5  | -    | 8.0  | 2.4  | 2.8  | -    | 6.5  |
| <i>Madracis decactis</i>          | 0.2  | 22.3 | 39.6 | 11.7 | 8.4  | 10.6 | 0.5  | 1.2  | 1.0  | -    | 1.7  | 0.9  | 1.8  |      | -    |
| <i>Madracis decactis</i>          | 0.6  | 9.1  | 49.6 | 10.4 | 7.1  | 20.0 | 1.0  | 2.2  | -    | -    | -    | -    | -    | -    | -    |
| <i>Madracis mirabilis</i>         | 0.3  | 7.7  | 66.8 | -    | 5.2  | 16.0 | 2.6  | -    | -    | -    | -    |      | -    | 1.4  | -    |
| Acroporidae                       |      |      |      |      |      |      |      |      |      |      |      |      |      |      |      |
| <i>Acropora palmata</i>           | 0.3  | 6.3  | 60.7 | tr   | 11.2 | 9.8  | 2.2  | 3.6  | 0.7  | 0.6  | 1.5  | 1.6  | tr   | tr   | 1.5  |
| <i>Acropora palmata</i>           | 0.1  | 5.5  | 80.3 | 0.3  | 2.9  | 9.1  | 0.5  | 1.3  | -    | -    | -    | -    | -    | -    | -    |
| <i>Acropora cervicornis</i>       | 0.2  | 6.6  | 56.3 | 6.6  | 7.6  | 10.2 | 2.4  | 3.0  | 0.8  | 0.2  | 1.3  | 1.7  | 1.2  | tr   | 1.2  |
| <i>Acropora cervicornis</i>       | 0.3  | 5.5  | 64.2 | 5.6  | 5.0  | 9.3  | 1.5  | 2.8  | 0.9  | 0.4  | 0.9  | 1.5  | tr   | tr   | 1.2  |
| <i>Acropora cervicornis</i>       | 0.1  | 12.3 | 78.1 | 2.5  | 3.2  | 2.5  | -    | tr   | 0.5  | 0.4  | 0.5  | -    | -    | -    | -    |
| <i>Acropora prolifera</i>         | 0.1  | 6.5  | 67.4 | -    | 11.3 | 11.3 | 0.4  | 3.0  | -    | -    | -    | -    | -    | -    | -    |
| Agariciidae                       |      |      |      |      |      |      |      |      |      |      |      |      |      |      |      |
| <i>Agaricia agaricites</i>        | 0.2  | 2.7  | 55.1 | tr   | 20.0 | tr   | 5.5  | -    | 1.9  | tr   | 4.5  | 2.2  | 7.8  | -    | -    |
| <i>Agaricia agaricites</i>        | 0.6  | 6.8  | 64.1 | 7.6  | 7.5  | 5.0  | 1.8  | -    | 1.5  | 0.2  | 1.7  | -    | 2.0  | 1.2  | -    |
| <i>Helioseris cucullata</i>       | 0.5  | 5.9  | 52.0 | 10.6 | 3.4  | 11.2 | 6.0  | -    | 3.0  | 0.3  | 2.3  | -    | 4.9  | -    | -    |
| Siderastreidae                    |      |      |      |      |      |      |      |      |      |      |      |      |      |      |      |
| <i>Siderastrea siderea</i>        | 0.3  | 3.5  | 32.5 | tr   | 13.2 | 18.6 | 0.6  | 7.0  | 4.3  | tr   | 15.2 | 3.6  | 1.2  | -    | -    |
| Poritidae                         |      |      |      |      |      |      |      |      |      |      |      |      |      |      |      |
| <i>Porites astreoides</i>         | 0.6  | 3.2  | 30.0 | tr   | 11.4 | 12.3 | 7.6  | tr   | 1.4  | -    | 14.6 | 1.7  | 7.8  | -    | 9.5  |
| <i>Porites astreoides</i>         | 0.2  | 5.2  | 70.6 | -    | 6.8  | 15.3 | -    | 1.8  | -    | -    | 0.1  | -    | -    | -    | -    |
| <i>Porites porites</i>            | 1.4  | 5.8  | 48.7 | tr   | 9.0  | 12.2 | 2.6  | 4.4  | 3.1  | -    | 6.9  | 1.9  | 3.9  | -    | -    |
| <i>Porites porites</i>            | 0.1  | 7.0  | 64.4 | -    | 4.3  | 12.3 | 3.7  | 3.1  | -    | -    | 4.6  | -    | -    | 0.6  | -    |
| <i>Porites divaricata</i>         | 0.1  | 1.6  | 23.1 | 6.3  | 10.7 | 8.2  | 8.3  | tr   | 2.0  | tr   | 6.4  | 3.0  | 30.3 | -    | -    |
| <i>Porites divaricata</i>         | 0.1  | 4.7  | 48.9 | -    | 16.8 | 8.2  | 5.3  | 5.2  | -    | -    | 4.3  | 2.1  | 4.7  | -    | -    |
| <i>Porites divaricata</i>         | 0.2  | 3.8  | 59.8 | 5.2  | 10.8 | 10.6 | 1.6  | 2.9  | -    | -    | 1.4  | -    | -    | -    | -    |
| <i>Porites furcata</i>            | 0.3  | 3.8  | 43.8 | 15.1 | 5.4  | 9.8  | 2.1  | 2.4  | 2.2  | tr   | 8.1  | 2.3  | 4.7  | -    | -    |
| <i>Porites furcata</i>            | 0.1  | 3.4  | 34.5 | tr   | 6.2  | 9.6  | 6.8  | 3.8  | 6.9  | tr   | 6.0  | 4.4  | 18.3 | -    | -    |
| <i>Porites furcata</i>            | 0.1  | 5.9  | 64.6 | -    | 11.8 | 13.8 | 1.3  | 2.5  | -    | -    | -    | -    | -    | -    | -    |
| Faviidae                          |      |      |      |      |      |      |      |      |      |      |      |      |      |      |      |
| <i>Manicina areolata</i>          | 0.1  | 3.4  | 36.5 | 4.4  | 12.7 | 25.4 | 3.0  | 9.8  | -    | -    | 4.0  | -    | -    | 1.4  | -    |
| <i>Colpophyllia natans</i>        | 0.1  | 4.3  | 35.8 | tr   | 19.1 | 17.7 | 4.7  | 6.1  | 0.5  | 0.9  | 6.2  | 1.2  | 1.6  | -    | 1.6  |
| <i>Colpophyllia breviserialis</i> | 0.1  | 3.9  | 36.3 | tr   | 21.6 | 15.6 | 4.4  | 5.1  | 0.7  | 0.8  | 6.5  | 0.9  | 1.4  | -    | 2.1  |
| <i>Cladocora arbuscula</i>        | 0.1  | 8.6  | 36.3 | 16.4 | 7.9  | 14.7 | 2.1  | 3.8  | 1.1  | 1.0  | 3.6  | -    | 1.8  | 2.6  | -    |
| <i>Montastrea annularis</i>       | tr   | 2.0  | 58.1 | tr   | 7.2  | 11.6 | 6.2  | tr   | -    | 3.3  | 5.3  | -    | -    | 5.9  | -    |
| <i>Montastrea cavernosa</i>       | 0.1  | 3.8  | 56.0 | -    | 14.1 | 12.3 | 2.1  | 3.1  | 1.4  | tr   | 3.0  | 0.7  | 2.7  | -    | 1.1  |
| <i>Solenastrea hyades</i>         |      | 1.5  | 73.0 | -    | 7.3  | 5.4  | 4.8  | -    | 0.3  | -    | 1.8  | 2.5  | 2.2  | -    | 1.0  |
| <i>Solenastrea hyades</i>         | 0.2  | 1.6  | 76.3 | -    | 9.5  | 6.4  | 3.1  | -    | 0.2  | -    | 1.0  | 0.5  | 0.4  | -    | 0.8  |

|                                |     |     |      |      |      |      |     |     |     |     |     |     |      |     |     |
|--------------------------------|-----|-----|------|------|------|------|-----|-----|-----|-----|-----|-----|------|-----|-----|
| Oculinidae                     |     |     |      |      |      |      |     |     |     |     |     |     |      |     |     |
| <i>Oculina diffusa</i>         | 0.1 | 5.6 | 66.3 | 1.5  | 5.3  | 18.6 | 0.5 | 0.4 | 0.5 | -   | 0.7 | -   | -    | -   | 0.5 |
| Meandrinidae                   |     |     |      |      |      |      |     |     |     |     |     |     |      |     |     |
| <i>Dichocoenia stokesii</i>    | 0.1 | 0.8 | 19.8 | tr   | 11.3 | 9.7  | 7.1 | tr  | 2.6 | -   | 8.1 | 4.3 | 29.2 | -   | 6.9 |
| Mussidae                       |     |     |      |      |      |      |     |     |     |     |     |     |      |     |     |
| <i>Mussa angulosa</i>          | 0.1 | 9.4 | -    | 67.3 | 4.8  | 14.7 | 1.2 | 2.2 | 0.1 | tr  | -   | -   | 0.1  | -   | 0.1 |
| <i>Scolymia lacera</i>         | 0.1 | 3.7 | 29.2 | tr   | 8.0  | 20.7 | 6.9 | 7.7 | 3.3 | -   | 7.8 | 2.1 | 10.9 | -   | -   |
| <i>Isophyllia sinuosa</i>      | tr  | 4.1 | 46.0 | 8.8  | 9.1  | 17.2 | 3.6 | 3.5 | 0.4 | 0.3 | 5.8 | -   | 0.3  | 0.7 | -   |
| <i>Isophyllastrea rigida</i>   | 0.2 | 4.6 | 14.0 | 33.0 | 11.5 | 17.5 | 3.2 | 4.7 | 1.0 | 0.4 | 6.7 | -   | 1.6  | 1.7 | -   |
| <i>Mycetophyllia ferox</i>     | 0.2 | 5.1 | 75.1 | -    | 6.5  | 11.2 | 0.5 | tr  | 0.3 | 0.1 | 1.0 | -   | -    | tr  | -   |
| Dendrophylliidae               | :   |     |      |      |      |      |     |     |     |     |     |     |      |     |     |
| <i>Balanophyllia floridana</i> | 0.4 | 5.9 | 28.0 | 11.1 | 14.3 | 15.5 | 3.9 | 7.0 | 3.4 | tr  | 6.6 | tr  | 4.0  | tr  | tr  |

**Table S10.** The FA composition (%) of the total lipids of Jamaican hard corals *Montastrea annularis* and *Stephanocoenia michelinii* versus the depth of habitat [97,98].

| FA   | <i>Montastrea annularis</i> |      |      |      |      |      | <i>Stephanocoenia michelinii</i> |      |      |      |      |      |      |
|------|-----------------------------|------|------|------|------|------|----------------------------------|------|------|------|------|------|------|
|      | Depth, m                    |      |      |      |      |      |                                  |      |      |      |      |      |      |
|      | 3                           | 6    | 9    | 12   | 18   | 24   | 3                                | 6    | 9    | 12   | 14   | 18   | 24   |
| 14:0 | 2.5                         | 3.8  | 1.5  | 2.5  | 0.9  | 1.8  | 0.3                              | 1.9  | 0.6  | 2.6  | 1.0  | 1.5  | 1.0  |
| 16:0 | 65.4                        | 62.5 | 61.0 | 66.4 | 72.3 | 70.3 | 6.9                              | 43.2 | 54.9 | 68.3 | 29.3 | 50.7 | 52.6 |
| 16:1 | 4.2                         | 5.1  | 2.0  | 4.8  | 2.6  | 0    | 0.5                              | 3.0  | 0    | 2.9  | 1.8  | 2.1  | 2.1  |
| 18:0 | 12.2                        | 8.2  | 8.3  | 9.4  | 12.1 | 18.8 | 2.6                              | 9.7  | 19.1 | 11.6 | 7.6  | 13.9 | 15.3 |
| 18:1 | 8.8                         | 12.4 | 11.7 | 10.3 | 7.8  | 7.0  | 2.1                              | 7.8  | 15.3 | 8.4  | 18.9 | 17.4 | 15.8 |
| 18:2 | 1.1                         | 1.6  | 2.0  | 1.1  | 0.6  | 0.6  | 0.4                              | 2.5  | 1.1  | 2.1  | 1.5  | 3.0  | 1.9  |
| 20:0 | 0.1                         | 0.5  | 0.1  | 0.5  | 1.0  | 0    | 0.6                              | 3.7  | 4.4  | 2.0  | 2.0  | 5.4  | 4.5  |
| 20:1 | 0.1                         | 0    | 0.6  | 2.0  | 2.8  | 1.5  | 0.5                              | 0    | 4.8  | 2.1  | 5.9  | 5.9  | 4.0  |
| 22:6 | 0                           | 2.2  | 1.4  | 0    | 0    | 0    | 82.8                             | 16.4 | 0    | 0    | 15.0 | 0    | 0    |

**Table S11.** The FA composition (%) of the total lipids of 8 species of hard corals, collected at the Great Barrier Reef (Australia) [99].

| FA   | Florida, Middle Ground, July, 25-30 m |                           |                            |                              |                          |                             | Grand Cayman, March, 2-5 m |                         |
|------|---------------------------------------|---------------------------|----------------------------|------------------------------|--------------------------|-----------------------------|----------------------------|-------------------------|
|      | <i>Porites furcata</i>                | <i>Porites devaricata</i> | <i>Cladocora arbuscula</i> | <i>Dicho-coenia stokesii</i> | <i>Madracis decactis</i> | <i>Millepora alcicornis</i> | <i>Porites furcata</i>     | <i>Acropora palmata</i> |
| 12:0 | 0                                     | 0.1                       | 0.1                        | 0.1                          | 0.5                      | 0.1                         | 0.3                        | 0.3                     |
| 14:0 | 3.4                                   | 1.6                       | 8.6                        | 0.8                          | 4.7                      | 3.4                         | 3.8                        | 6.3                     |
| 16:0 | 34.5                                  | 23.1                      | 36.3                       | 19.8                         | 40.4                     | 42.1                        | 43.8                       | 60.7                    |
| 18:0 | 6.2                                   | 10.7                      | 7.9                        | 11.3                         | 8.0                      | 5.4                         | 5.4                        | 11.2                    |
| 20:0 | 6.8                                   | 8.3                       | 2.1                        | 7.1                          | 3.9                      | 4.7                         | 2.1                        | 2.2                     |
| 22:0 | tr                                    | tr                        | 1.0                        | 0                            | tr                       | 1.0                         | tr                         | 0.6                     |
| 24:0 | 0                                     | 0                         | 2.6                        | 0                            | 0                        | tr                          | 0                          | tr                      |
| 16:1 | tr                                    | 6.3                       | 16.4                       | tr                           | tr                       | tr                          | 15.1                       | tr                      |

|         |      |      |      |      |      |      |     |     |
|---------|------|------|------|------|------|------|-----|-----|
| 18:1    | 9.6  | 8.2  | 14.7 | 9.7  | 13.4 | 11.1 | 9.8 | 9.8 |
| 20:1    | 3.8  | tr   | 3.8  | tr   | tr   | tr   | 2.4 | 3.6 |
| 22:1    | 6.0  | 6.4  | 3.6  | 8.1  | 3.1  | 1.0  | 8.1 | 1.5 |
| 24:1    | 0    | 0    | 0    | 6.9  | 0    | 2.1  | 0   | 1.5 |
| 20:5n-3 | 6.9  | 2.0  | 1.1  | 2.6  | 0.7  | 1.2  | 2.2 | 0.7 |
| 22:5    | 4.4  | 3.0  | 0    | 4.3  | 5.0  | 4.5  | 2.3 | 1.6 |
| 22:6n-3 | 18.3 | 30.3 | 1.8  | 29.2 | 20.3 | 23.5 | 4.7 | tr  |

**Table S12.** The FA composition (%) of the hard corals total lipids of Vietnam (B) and Seychelles (C) [100].

| Fatty acid | Coral family           |                        |                           |                           |                         |                               |                             |                             |                             |                             |                               |                               |                              |                      |                        |                         |                           |                            |
|------------|------------------------|------------------------|---------------------------|---------------------------|-------------------------|-------------------------------|-----------------------------|-----------------------------|-----------------------------|-----------------------------|-------------------------------|-------------------------------|------------------------------|----------------------|------------------------|-------------------------|---------------------------|----------------------------|
|            | Acroporidae            |                        |                           |                           |                         | Pocilloporidae                |                             |                             |                             |                             |                               |                               |                              | Poritidae            |                        |                         | Dendrophyllidae           |                            |
|            | <i>Acropora nasuta</i> | <i>Acropora nasuta</i> | <i>Acropora millepora</i> | <i>Acropora millepora</i> | <i>Acropora florida</i> | <i>Seriatopora caliendrum</i> | <i>Sylophora pistillata</i> | <i>Sylophora pistillata</i> | <i>Sylophora pistillata</i> | <i>Sylophora pistillata</i> | <i>Pocillopora damicornis</i> | <i>Pocillopora damicornis</i> | <i>Pocillopora verrucosa</i> | <i>Porites lutea</i> | <i>Goniopora</i> sp. I | <i>Goniopora</i> sp. II | <i>Tubastrea coccinea</i> | <i>Tubastrea micrantha</i> |
|            | B                      | B                      | B                         | B                         | B                       | C                             | C                           | C                           | B                           | B                           | B                             | B                             | B                            | B                    | B                      | B                       | C                         | C                          |
| 14:0       | 5.4                    | 2.5                    | 1.2                       | 3.6                       | 2.7                     | 1.8                           | 2.0                         | 3.3                         | 4.0                         | 3.5                         | 3.9                           | 3.6                           | 5.4                          | 5.4                  | 2.2                    | 2.0                     | 0.9                       | 0.5                        |
| 16:0       | 42.5                   | 38.6                   | 24.5                      | 41.3                      | 33.1                    | 24.0                          | 21.8                        | 18.4                        | 38.6                        | 41.0                        | 37.2                          | 44.5                          | 41.7                         | 49.1                 | 17.2                   | 15.0                    | 7.2                       | 6.4                        |
| 16:1n-7    | 0.8                    | 1.0                    | 1.0                       | 2.6                       | 1.2                     | 2.1                           | 2.9                         | 4.1                         | 3.2                         | 3.0                         | 2.2                           | 3.1                           | 2.3                          | 1.9                  | 3.5                    | 2.3                     | 5.9                       | 3.7                        |
| 16:2       | -                      | 1.8                    | -                         | 0.7                       | -                       | 0.9                           | -                           | 1.3                         | 0.6                         | 0.5                         | 0.6                           | 0.3                           | 0.5                          | 0.7                  | 0.5                    | 1.2                     | 3.1                       | 2.9                        |
| 18:0       | 6.9                    | 7.3                    | 9.3                       | 8.7                       | 9.0                     | 6.5                           | 4.6                         | 8.6                         | 11.4                        | 10.6                        | 11.4                          | 10.2                          | 8.0                          | 7.2                  | 5.7                    | 6.8                     | 4.2                       | 6.7                        |
| 18:1n-9    | 3.7                    | 8.0                    | 2.2                       | 6.5                       | 3.2                     | 13.3                          | 14.4                        | 7.8                         | 3.3                         | 5.5                         | 3.3                           | 4.9                           | 7.0                          | 3.8                  | 11.7                   | 6.6                     | 23.3                      | 26.4                       |
| 18:2n-6    | 0.7                    | 2.1                    | 1.1                       | 1.7                       | 1.3                     | 1.7                           | 1.7                         | 0.8                         | 1.7                         | 1.9                         | 1.7                           | 1.8                           | 1.2                          | 1.0                  | 2.2                    | 1.6                     | 2.0                       | 1.8                        |
| 18:3n-6    | 9.7                    | 5.8                    | 9.5                       | 5.0                       | 8.2                     | 2.7                           | 3.1                         | 1.7                         | 5.6                         | 5.4                         | 5.6                           | 4.1                           | 2.6                          | 9.7                  | 4.5                    | 6.2                     | 0.4                       | 0.3                        |
| 18:4n-3    | 4.9                    | 2.6                    | 6.6                       | 1.1                       | 5.1                     | 1.7                           | 1.3                         | 1.9                         | 2.0                         | 1.4                         | 2.2                           | 0.8                           | 3.3                          | 2.9                  | 2.3                    | 4.3                     | 0.7                       | 0.8                        |
| 20:0       | -                      | 0.5                    | -                         | 1.3                       | -                       | -                             | -                           | 0.8                         | 1.7                         | 1.6                         | 1.7                           | 1.5                           | 1.3                          | 1.0                  | -                      | -                       | 0.4                       | 1.0                        |
| 20:1       | 1.3                    | 0.7                    | 1.1                       | 1.6                       | 1.0                     | 0.9                           | 0.7                         | 0.7                         | 0.7                         | 1.4                         | 3.5                           | 1.1                           | 2.6                          | 0.9                  | 5.9                    | 2.9                     | 3.0                       | 3.2                        |
| 20:2n-6    | 0.2                    | 2.0                    | 0.2                       | 0.7                       | 0.5                     | 2.7                           | 3.6                         | 1.0                         | 0.6                         | 0.8                         | 0.6                           | 0.6                           | 0.7                          | -                    | 1.7                    | 1.4                     | 0.9                       | 1.6                        |
| 20:3n-6    | 2.3                    | 1.9                    | 2.4                       | 2.0                       | 0.3                     | 11.3                          | 12.3                        | 5.9                         | 6.6                         | 7.2                         | 4.1                           | 7.6                           | 3.2                          | 1.6                  | 3.6                    | 2.9                     | 0.8                       | 0.5                        |
| 20:4n-6    | 3.2                    | 7.1                    | 7.2                       | 8.0                       | 11.0                    | 4.8                           | 4.3                         | 7.6                         | 3.1                         | 1.7                         | 2.1                           | 2.0                           | 1.8                          | 2.3                  | 13.3                   | 21.9                    | 7.8                       | 6.6                        |
| 20:4n-3    | 0.3                    | 0.2                    | -                         | 0.5                       | -                       | 1.3                           | 1.7                         | 0.9                         | 0.4                         | 0.4                         | 1.3                           | 0.4                           | 1.0                          | 0.3                  | 0.7                    | 1.1                     | 0.9                       | 1                          |
| 20:5n-3    | 4.5                    | 0.8                    | 10.4                      | 1.6                       | 6.9                     | 2.6                           | 2.0                         | 7.7                         | 2.6                         | 1.4                         | 1.8                           | 1.4                           | 3.2                          | 3.3                  | 4.1                    | 4.6                     | 14.9                      | 10.9                       |
| 22:3n-6    | -                      | -                      | -                         | 0.6                       | 0.3                     |                               | 1.9                         | 0.9                         | 0.5                         | 0.6                         | 0.3                           | 0.6                           | 0.3                          | -                    | 0.4                    | 0.3                     | 0.5                       | 0.3                        |

|         |     |      |      |      |     |      |      |      |      |     |      |     |      |     |      |      |      |      |
|---------|-----|------|------|------|-----|------|------|------|------|-----|------|-----|------|-----|------|------|------|------|
| 22:4n-6 | 2.4 | 4.3  | 6.0  | 1.0  | 6.3 | 1.5  | 1.8  | 3.8  | 1.7  | 1.0 | 1.3  | 0.9 | 1.3  | 1.4 | 3.3  | 6.0  | 4.7  | 5.5  |
| 22:5n-6 | 0.3 | -    | 0.6  | -    | 1.3 | -    | -    | -    | -    | -   | -    | -   | -    | -   | -    | -    | -    | -    |
| 22:5n-3 | 1.3 | 0.9  | 3.0  | 0.5  | 1.2 | 1.2  | 1.3  | 4.5  | 0.7  | 4.5 | 0.6  | 0.4 | 0.7  | 0.8 | 1.0  | 0.8  | 16.4 | 17.3 |
| 22:6n-3 | 8.8 | 10.8 | 12.6 | 10.4 | 6.7 | 16.9 | 16.4 | 14.4 | 10.1 | 8.8 | 14.0 | 9.5 | 10.4 | 5.3 | 15.7 | 11.5 | 1.4  | 1.3  |

**Table S13.** The FA composition (%) of total lipids of 5 hard coral species of the Caribbean Islands and the Red Sea [35] and cultivated for one month colony of *Galaxea fascicularis* [101].

| FA       | Caribbean Islands      |                             | Red Sea                      |                              |                              | <i>Galaxea fascicularis</i> |
|----------|------------------------|-----------------------------|------------------------------|------------------------------|------------------------------|-----------------------------|
|          | <i>Porites porites</i> | <i>Montastrea annularis</i> | <i>Pocillopora verrucosa</i> | <i>Stylophora pistillata</i> | <i>Goniastrea retiformis</i> |                             |
| 14:0     | 1.2                    | 1.1                         | 2.3                          | 1.6                          | 2.4                          | 1.9                         |
| 16:0     | 30.0                   | 58.6                        | 36.8                         | 27.3                         | 49.5                         | 17.3                        |
| 16:1n-9  | 1.1                    |                             | 0.1                          | 0.3                          |                              | -                           |
| 16:1n-7  | 0.5                    | 1.9                         | 5.1                          | 3.8                          | 2.7                          | 2.3                         |
| 16:2     | -                      | -                           | -                            | -                            | 0.3                          | -                           |
| 17:0     | -                      | -                           | 0.1                          | -                            | 0.2                          | 0.4                         |
| 18:0     | 9.5                    | 12.4                        | 9.9                          | 7.1                          | 16.8                         | 6.8                         |
| 18:1n-9  | 5.9                    | 7.1                         | 8.3                          | 10.7                         | 4.7                          | 1.3                         |
| 18:1n-7  | 0.5                    | 1.4                         | 2.0                          | 3.2                          | 2.8                          | -                           |
| 18:2n-6  | 4.0                    | 1.2                         | 2.2                          | 1.3                          | 1.3                          | 0.6                         |
| 19:0     | 5.1                    | 3.3                         | 5.5                          | 2.9                          | 3.7                          | -                           |
| 19:1     | 0.2                    | 0.2                         | 0.1                          | -                            | 0.2                          | -                           |
| 18:3n-3  | -                      | -                           | 0.1                          | 0.1                          | -                            | 5.8                         |
| 18:4n-3  | 1.4                    | 0.2                         | 1.9                          | 2.6                          | 0.7                          | 7.3                         |
| 20:0     | 0.7                    | 0.8                         | 1.9                          | 0.5                          | 1.1                          | -                           |
| 20:1n-11 | -                      | -                           | 0.1                          | 0.4                          | -                            | 0.8                         |
| 20:1n-9  | 0.9                    | 1.9                         | 4.8                          | 2.6                          | 1.4                          | 0.3                         |
| 20:1n-7  | 1.4                    | 0.2                         | 0.5                          | 0.4                          | 0.2                          | -                           |
| 20:2n-6  | 2.4                    | 0.3                         | 0.8                          | 0.6                          | 0.3                          | -                           |
| 20:3n-6  | 1.3                    | 1.4                         | 6.5                          | 6.9                          | 1.3                          | 1.2                         |
| 20:4n-6  | 9.1                    | 2.2                         | 1.5                          | 4.9                          | 3.1                          | 14.5                        |
| 20:4n-3  | -                      | -                           | 1.3                          | 2.3                          | 0.3                          | 0.1                         |
| 20:5n-3  | 5.0                    | 0.5                         | 0.6                          | 1.5                          | 0.6                          | 10.4                        |
| 22:0     | 0.3                    |                             | 0.2                          | 0.2                          | 0.3                          | -                           |
| 22:1n-9  | 0.4                    | 0.3                         | 0.3                          | 0.3                          | 0.2                          | -                           |
| 22:3n-6  | -                      | -                           | 0.5                          | 0.7                          | -                            | -                           |
| 22:3n-3  | -                      | -                           | -                            | -                            | -                            | 10.1                        |
| 22:5n-6  | 5.2                    | 0.9                         | 1.3                          | 2.8                          | 1.6                          | -                           |
| 22:5n-3  | 2.1                    | 0.3                         | 0.3                          | 0.6                          | -                            | 1.3                         |

|         |     |     |     |      |     |     |
|---------|-----|-----|-----|------|-----|-----|
| 22:6n-3 | 6.7 | 2.9 | 3.6 | 12.0 | 2.1 | 9.6 |
| 24:1n-9 | 1.3 | -   | -   | 0.6  | -   | -   |

**Table S14.** The total lipids FA composition (% of total, mean  $\pm$  SD,  $n = 3$ ) of the Acroporidae family corals collected at Vietnam coast in spring [103]. i = *iso*-, and ai = *anteiso*-FA

| FA      | <i>Acropora cerealis</i> | <i>Acropora formosa</i> | <i>Acropora gemmifera</i> | <i>Acropora palifera</i> | <i>Acropora sp.</i> | <i>Acropora nobilis</i> |
|---------|--------------------------|-------------------------|---------------------------|--------------------------|---------------------|-------------------------|
| 12:0    | 0.5 $\pm$ 0.2            | 0.2 $\pm$ 0.0           | 0.6 $\pm$ 0.4             | 0.7 $\pm$ 0.2            | 0.2 $\pm$ 0.1       | 0.1 $\pm$ 0.1           |
| 14:0    | 3.2 $\pm$ 0.1            | 2.9 $\pm$ 0.4           | 3.6 $\pm$ 0.1             | 2.3 $\pm$ 0.1            | 4.4 $\pm$ 0.2       | 5.9 $\pm$ 0.3           |
| 14:1    | 0.2 $\pm$ 0.1            | 0.2 $\pm$ 0.1           | 0.3 $\pm$ 0.1             | 0.2 $\pm$ 0.1            | 0.1 $\pm$ 0.0       | 0.2 $\pm$ 0.1           |
| i-15:0  | 0.2 $\pm$ 0.0            | 0.2 $\pm$ 0.0           | -                         | -                        | 0.3 $\pm$ 0.1       | 0.4 $\pm$ 0.0           |
| 15:0    | 0.1 $\pm$ 0.0            | 0.2 $\pm$ 0.0           | 0.2 $\pm$ 0.0             | 0.1 $\pm$ 0.0            | 0.1 $\pm$ 0.0       | 0.3 $\pm$ 0.1           |
| 15:1    | 0.3 $\pm$ 0.2            | 0.3 $\pm$ 0.1           | 0.1 $\pm$ 0.0             | -                        | 0.1 $\pm$ 0.0       | 0.1 $\pm$ 0.0           |
| 16:0    | 25.3 $\pm$ 1.1           | 22.8 $\pm$ 3.0          | 30.8 $\pm$ 0.6            | 42.2 $\pm$ 2.8           | 51.2 $\pm$ 1.5      | 39.9 $\pm$ 0.9          |
| 16:1n-7 | 2.3 $\pm$ 0.2            | 3.1 $\pm$ 0.9           | 2.9 $\pm$ 0.1             | 1.9 $\pm$ 0.0            | 1.9 $\pm$ 0.3       | 4.1 $\pm$ 0.4           |
| i-17:0  | -                        | -                       | -                         | -                        | -                   | 0.1 $\pm$ 0.1           |
| ai-17:0 | 0.1 $\pm$ 0.0            | 0.1 $\pm$ 0.0           | 0.1 $\pm$ 0.0             | 0.1 $\pm$ 0.0            | 0.4 $\pm$ 0.2       | 0.3 $\pm$ 0.1           |
| 16:2    | 0.1 $\pm$ 0.0            | 0.2 $\pm$ 0.0           | 0.1 $\pm$ 0.0             | -                        | 0.1 $\pm$ 0.1       | 0.1 $\pm$ 0.0           |
| 17:0    | 0.1 $\pm$ 0.0            | 0.1 $\pm$ 0.0           | 0.1 $\pm$ 0.0             | 0.1 $\pm$ 0.0            | 0.2 $\pm$ 0.1       | 0.2 $\pm$ 0.1           |
| 17:1    | 0.4 $\pm$ 0.1            | 0.4 $\pm$ 0.1           | 0.4 $\pm$ 0.1             | 0.2 $\pm$ 0.1            | 0.1 $\pm$ 0.0       | 0.1 $\pm$ 0.0           |
| 18:0    | 13.0 $\pm$ 0.2           | 11.4 $\pm$ 0.6          | 9.3 $\pm$ 1.2             | 20.4 $\pm$ 0.7           | 8.9 $\pm$ 0.6       | 8.4 $\pm$ 0.5           |
| 18:1n-9 | 2.9 $\pm$ 0.4            | 3.5 $\pm$ 1.7           | 5.8 $\pm$ 5.7             | 3.3 $\pm$ 0.8            | 6.0 $\pm$ 1.6       | 6.8 $\pm$ 1.5           |
| 18:1n-7 | 0.5 $\pm$ 0.0            | 0.6 $\pm$ 0.1           | 0.4 $\pm$ 0.1             | 0.6 $\pm$ 0.1            | 0.4 $\pm$ 0.1       | 0.9 $\pm$ 0.2           |
| 18:2    | 0.1 $\pm$ 0.0            | 0.2 $\pm$ 0.1           | 0.1 $\pm$ 0.0             | 0.2 $\pm$ 0.0            | 0.3 $\pm$ 0.1       | 0.5 $\pm$ 0.1           |
| 18:2n-6 | 0.9 $\pm$ 0.1            | 1.0 $\pm$ 0.4           | 1.2 $\pm$ 0.5             | 0.6 $\pm$ 0.1            | 1.4 $\pm$ 0.4       | 1.6 $\pm$ 0.4           |
| 19:0    | 0.4 $\pm$ 0.1            | 0.4 $\pm$ 0.0           | 0.3 $\pm$ 0.1             | 0.3 $\pm$ 0.1            | 0.2 $\pm$ 0.1       | 0.2 $\pm$ 0.0           |
| 18:3n-6 | 3.6 $\pm$ 0.1            | 5.1 $\pm$ 0.8           | 4.2 $\pm$ 0.7             | 2.6 $\pm$ 0.4            | 6.8 $\pm$ 0.6       | 8.0 $\pm$ 0.7           |
| 18:3n-3 | 0.1 $\pm$ 0.0            | -                       | -                         | -                        | -                   | 0.1 $\pm$ 0.0           |
| 18:4n-3 | 1.4 $\pm$ 0.1            | 1.8 $\pm$ 0.4           | 1.2 $\pm$ 0.1             | 1.0 $\pm$ 0.1            | 1.6 $\pm$ 0.2       | 2.7 $\pm$ 0.4           |
| 20:0    | 1.0 $\pm$ 0.1            | 0.8 $\pm$ 0.1           | 1.0 $\pm$ 0.4             | 0.8 $\pm$ 0.1            | 1.0 $\pm$ 0.2       | 0.9 $\pm$ 0.3           |
| 20:1n-9 | 2.2 $\pm$ 0.0            | 1.8 $\pm$ 0.1           | 1.5 $\pm$ 0.4             | 1.1 $\pm$ 0.0            | 1.7 $\pm$ 0.1       | 2.3 $\pm$ 0.3           |
| 20:1n-7 | 0.3 $\pm$ 0.0            | 0.5 $\pm$ 0.2           | 0.3 $\pm$ 0.1             | 0.5 $\pm$ 0.1            | 0.1 $\pm$ 0.0       | 0.2 $\pm$ 0.0           |
| 20:2n-6 | 0.6 $\pm$ 0.1            | 0.4 $\pm$ 0.0           | 0.4 $\pm$ 0.1             | 0.3 $\pm$ 0.1            | 0.1 $\pm$ 0.1       | 0.4 $\pm$ 0.2           |
| 20:3    | -                        | -                       | 0.7 $\pm$ 0.1             | 0.4 $\pm$ 0.1            | 0.4 $\pm$ 0.1       | -                       |
| 20:3n-6 | 0.9 $\pm$ 0.1            | 0.9 $\pm$ 0.0           | 1.1 $\pm$ 0.3             | 0.4 $\pm$ 0.0            | 1.1 $\pm$ 0.2       | 1.3 $\pm$ 0.3           |
| 20:4n-6 | 6.7 $\pm$ 0.4            | 14.7 $\pm$ 2.1          | 10.4 $\pm$ 0.8            | 1.8 $\pm$ 0.2            | 2.0 $\pm$ 0.3       | 2.3 $\pm$ 0.3           |
| 20:4n-3 | 0.1 $\pm$ 0.1            | 0.2 $\pm$ 0.1           | 0.3 $\pm$ 0.1             | 0.1 $\pm$ 0.1            | 0.2 $\pm$ 0.1       | 0.3 $\pm$ 0.1           |
| 20:5n-3 | 16.5 $\pm$ 0.4           | 9.5 $\pm$ 1.3           | 10.3 $\pm$ 0.7            | 9.9 $\pm$ 2.1            | 1.7 $\pm$ 0.3       | 3.0 $\pm$ 0.5           |
| 22:0    | 0.3 $\pm$ 0.1            | 0.2 $\pm$ 0.0           | -                         | 0.2 $\pm$ 0.0            | 0.1 $\pm$ 0.0       | -                       |
| 22:1    | 0.2 $\pm$ 0.1            | 0.1 $\pm$ 0.0           | 0.2 $\pm$ 0.1             | 0.2 $\pm$ 0.1            | 0.2 $\pm$ 0.1       | 0.2 $\pm$ 0.1           |
| 22:2n-6 | 0.4 $\pm$ 0.4            | 0.3 $\pm$ 0.1           | 1.0 $\pm$ 0.2             | 0.1 $\pm$ 0.1            | -                   | -                       |
| 22:4n-6 | 5.5 $\pm$ 0.6            | 7.2 $\pm$ 1.2           | 4.1 $\pm$ 1.1             | 2.6 $\pm$ 0.6            | 1.1 $\pm$ 0.2       | 1.3 $\pm$ 0.3           |

|         |         |         |         |         |         |         |
|---------|---------|---------|---------|---------|---------|---------|
| 22:5n-3 | 3.9±0.1 | 3.1±0.6 | 2.6±0.6 | 1.7±0.1 | 0.7±0.1 | 1.2±0.3 |
| 22:6n-3 | 6.3±0.4 | 6.2±0.1 | 4.9±1.0 | 3.3±0.4 | 4.1±0.3 | 4.2±0.4 |

**Table S15.** The total lipids FA composition (% of total, mean ± SD,  $n = 3$ ) of coral of the families Pocilloporidae, Pectiniidae and Fungiidae collected at Vietnam coast in spring [103]. i = *iso*-, and ai = *anteiso*-FA

| FA      | Pocilloporidae               |                               |                            | Pectiniidae                     | Fungiidae                   |
|---------|------------------------------|-------------------------------|----------------------------|---------------------------------|-----------------------------|
|         | <i>Stylophora pistillata</i> | <i>Pocillopora damicornis</i> | <i>Seriatopora hystrix</i> | <i>Echinophyllia orpheensis</i> | <i>Sandalolitha robusta</i> |
| 12:0    | 0.2±0.1                      | 0.2±0.0                       | 0.1±0.0                    | 0.1±0.0                         | 0.1±0.1                     |
| 14:0    | 5.3±1.4                      | 3.6±0.2                       | 5.9±0.6                    | 1.5±0.2                         | 4.6±0.2                     |
| 14:1    | 0.2±0.1                      | 0.2±0.0                       | 0.2±0.0                    | 0.2±0.0                         | 0.9±0.2                     |
| i-15:0  | -                            | 0.1±0.0                       | -                          | -                               | 0.4±0.1                     |
| 15:0    | 0.1±0.0                      | 0.1±0.0                       | 0.1±0.0                    | 0.1±0.0                         | 0.6±0.2                     |
| 15:1    | -                            | -                             | -                          | -                               | -                           |
| 16:0    | 39.9±4.0                     | 36.8±1.0                      | 42.9±2.5                   | 40.0±1.2                        | 35.5±1.1                    |
| 16:1n-7 | 3.8±0.5                      | 2.2±0.1                       | 3.9±0.0                    | 2.2±0.2                         | 4.8±0.5                     |
| i-17:0  | -                            | -                             | -                          | -                               | 0.6±0.1                     |
| ai-17:0 | 0.3±0.2                      | 0.1±0.0                       | -                          | 0.4±0.1                         | 0.3±0.0                     |
| 16:2    | 0.2±0.1                      | -                             | 0.1±0.0                    | 0.2±0.0                         | 1.3±0.2                     |
| 17:0    | 0.1±0.0                      | 0.1±0.0                       | 0.2±0.0                    | -                               | 0.9±0.2                     |
| 17:1    | 0.1±0.0                      | 0.2±0.0                       | 0.1±0.0                    | -                               | 0.4±0.2                     |
| 18:0    | 7.9±0.5                      | 14.5±1.2                      | 10.8±0.4                   | 5.7±0.4                         | 14.2±0.7                    |
| 18:1n-9 | 7.2±1.7                      | 4.8±0.5                       | 5.3±0.1                    | 20.3±0.8                        | 8.0±0.5                     |
| 18:1n-7 | 1.3±0.1                      | 0.7±0.1                       | 1.1±0.1                    | 0.7±0.2                         | 3.5±0.2                     |
| 18:2    | 0.1±0.0                      | -                             | 0.2±0.0                    | 0.6±0.2                         | 0.4±0.1                     |
| 18:2n-6 | 0.6±0.1                      | 1.3±0.1                       | 0.5±0.0                    | 1.0±0.3                         | 1.4±0.2                     |
| 19:0    | -                            | 0.1±0.0                       | -                          | -                               | 0.5±0.1                     |
| 18:3n-6 | 0.9±0.1                      | 2.3±0.1                       | 1.5±0.1                    | 2.4±0.2                         | 1.2±0.3                     |
| 18:3n-3 | 0.2±0.1                      | 0.2±0.0                       | 0.1±0.0                    | -                               | 0.1±0.0                     |
| 18:4n-3 | 1.8±0.1                      | 2.1±0.1                       | 1.2±0.0                    | 1.1±0.2                         | 0.1±0.0                     |
| 20:0    | 0.6±0.1                      | 1.6±0.2                       | 0.5±0.1                    | 0.3±0.1                         | 1.1±0.3                     |
| 20:1n-9 | 1.0±0.5                      | 1.5±0.1                       | 0.4±0.1                    | 1.7±0.2                         | 1.4±0.2                     |
| 20:1n-7 | 0.1±0.0                      | -                             | -                          | 0.2±0.0                         | 0.5±0.1                     |
| 20:2n-6 | 0.4±0.1                      | 0.4±0.0                       | 0.2±0.0                    | 0.5±0.1                         | 0.7±0.2                     |
| 20:3    | 0.1±0.0                      | 0.3±0.2                       | -                          | -                               | 0.2±0.1                     |
| 20:3n-6 | 2.9±0.3                      | 2.4±0.0                       | 3.1±0.4                    | 0.7±0.2                         | 0.6±0.2                     |
| 20:4n-6 | 5.1±0.2                      | 3.9±0.0                       | 3.5±0.5                    | 3.4±0.3                         | 4.2±0.3                     |
| 20:4n-3 | 1.8±0.5                      | 0.8±0.1                       | 1.0±0.1                    | 0.3±0.0                         | -                           |
| 20:5n-3 | 1.8±0.1                      | 3.0±0.3                       | 1.8±0.2                    | 1.7±0.2                         | 1.6±0.1                     |
| 22:0    | -                            | 0.3±0.1                       | -                          | -                               | 0.2±0.1                     |
| 22:1    | -                            | -                             | -                          | 0.3±0.2                         | 0.5±0.2                     |
| 22:2n-6 | 0.4±0.0                      | 0.6±0.3                       | -                          | -                               | 0.3±0.1                     |



|         |          |          |          |         |         |
|---------|----------|----------|----------|---------|---------|
| 22:4n-6 | 1.9±0.1  | 2.6±0.1  | 1.2±0.1  | 1.7±0.2 | 1.4±0.2 |
| 22:5n-3 | 1.1±0.3  | 0.7±0.1  | 1.1±0.3  | 2.3±0.3 | 0.7±0.2 |
| 22:6n-3 | 13.2±2.1 | 12.3±0.1 | 13.3±2.2 | 9.2±0.4 | 2.6±0.2 |

**Table S16.** The total lipids FA composition (% of total, mean ± SD,  $n = 3$ ) of corals of the families Poritidae and Faviidae collected at Vietnam coast in spring [103], and *Caulastrea tumida* (January, the South-China Sea, Vietnam) [92].

| FA      | Poritidae                 |                           |                       | Faviidae           |                     |      |
|---------|---------------------------|---------------------------|-----------------------|--------------------|---------------------|------|
|         | <i>Porites cylindrica</i> | <i>Porites nigrescens</i> | <i>Porites lobata</i> | <i>Favia</i> sp. I | <i>Favia</i> sp. II |      |
| 12:0    | 0.3±0.0                   | 0.1±0.0                   | 0.2±0.0               | 0.2±0.0            | 0.1±0.0             | 2.5  |
| 14:0    | 2.3±0.2                   | 1.5±0.0                   | 2.3±0.2               | 4.9±0.4            | 5.0±0.4             |      |
| i-15:0  | -                         | -                         | 0.2±0.0               | -                  | 0.2±0.0             |      |
| 15:0    | 0.1±0.0                   | 0.2±0.1                   | 0.5±0.1               | -                  | -                   | 41.1 |
| 16:0    | 36.3±10.0                 | 40.8±2.8                  | 35.4±3.4              | 40.4±2.4           | 38.7±2.9            |      |
| 16:1n-7 | 1.6±0.1                   | 1.5±0.1                   | 2.8±0.5               | 3.7±0.3            | 4.3±0.6             |      |
| ai-17:0 | 0.1±0.0                   | 0.2±0.1                   | 0.2±0.0               | 0.3±0.1            | 0.2±0.1             | 0.1  |
| 16:2    | 0.1±0.0                   | 0.1±0.0                   | 0.2±0.1               | 0.1±0.0            | 0.3±0.0             | 0.2  |
| 17:0    | 0.1±0.0                   | 0.1±0.0                   | 0.3±0.0               | -                  | -                   | 0.6  |
| 17:1    | 0.2±0.1                   | 0.2±0.1                   | 0.3±0.0               | -                  | -                   |      |
| 18:0    | 9.8±0.7                   | 12.7±0.4                  | 7.9±0.7               | 4.5±0.7            | 5.2±0.4             |      |
| 18:1n-9 | 15.1±1.3                  | 9.4±0.1                   | 19.0±1.2              | 7.6±0.4            | 9.1±0.9             | 3.4  |
| 18:1n-7 | 0.6±0.1                   | 0.5±0.0                   | 1.4±0.2               | 1.1±0.2            | 1.1±0.2             | 2.2  |
| 18:2    | 0.2±0.0                   | 0.2±0.0                   | 0.2±0.0               | 1.1±0.3            | 0.6±0.1             | 0.3  |
| 18:2n-6 | 1.1±0.1                   | 0.6±0.1                   | 1.5±0.2               | 1.6±0.2            | 3.0±0.2             | 0.8  |
| 18:3n-6 | 1.6±0.4                   | 0.6±0.0                   | 1.3±0.2               | 10.6±0.8           | 9.9 ±0.6            | 6.0  |
| 18:3n-3 | 0.1±0.0                   | -                         | 0.1±0.0               | -                  | -                   | 0.8  |
| 18:4n-3 | 1.7±0.7                   | 1.6±0.1                   | 0.6±0.1               | 1.2±0.2            | 1.1±0.1             |      |
| 20:0    | 0.5±0.1                   | 0.5±0.0                   | 0.4±0.1               | 0.4±0.0            | 0.6±0.1             |      |
| 20:1n-9 | 1.1±0.1                   | 1.3±0.3                   | 1.2±0.3               | 0.4±0.1            | 0.5±0.0             | 0.9  |
| 20:1n-7 | 0.5±0.4                   | 0.4±0.1                   | -                     | -                  | -                   | 0.3  |
| 20:2n-6 | 1.1±0.1                   | 0.7±0.3                   | 0.9±0.2               | 0.1±0.0            | 0.3±0.0             | 1.9  |
| 20:3    | 0.1±0.0                   | 0.6±0.6                   | -                     | 0.1±0.0            | -                   |      |
| 20:3n-6 | 0.4±0.1                   | 0.2±0.0                   | 0.6±0.1               | 1.9±0.3            | 2.1±0.2             |      |
| 20:4n-6 | 6.1±1.6                   | 3.2±0.2                   | 7.0±1.4               | 4.6±0.2            | 3.7±0.3             | 4.9  |
| 20:4n-3 | 0.2±0.0                   | 0.2±0.0                   | 0.2±0.0               | 0.2±0.0            | 0.2±0.1             | 0.2  |
| 20:5n-3 | 4.1±1.1                   | 4.8±0.7                   | 2.0±0.2               | 0.8±0.2            | 1.0±0.2             | 2.9  |
| 22:0    | 0.3±0.1                   | 0.3±0.1                   | -                     | 0.1±0.0            | -                   | 0.2  |
| 22:1    | 0.1±0.0                   | 0.2±0.1                   | -                     | -                  | 0.2±0.0             | 0.5  |
| 22:2n-6 | 0.1±0.0                   | 0.3±0.0                   | -                     | 0.1±0.0            | -                   |      |
| 22:4n-6 | 3.1±1.1                   | 3.2±0.9                   | 4.2±0.6               | 2.1±0.4            | 2.0±0.4             |      |
| 22:5n-3 | 1.3±0.4                   | 1.5±0.4                   | 2.1±0.5               | 6.7±0.5            | 6.2±0.6             | 1.9  |
| 22:6n-3 | 8.7±2.9                   | 11.6±0.5                  | 5.5±0.4               | 3.6±0.4            | 2.9±0.3             | 10.1 |
| 24:0    | 0.1±0.0                   | 0.2±0.0                   | 0.2±0.0               | -                  | -                   | -    |

|              |         |         |         |   |   |   |
|--------------|---------|---------|---------|---|---|---|
| 24:1n-9      | 0.1±0.0 | 0.1±0.0 | 0.1±0.0 | - | - | - |
| 24:2n-6      | -       | 0.1±0.0 | 0.1±0.0 | - | - | - |
| Δ5,9-24:2    | 0.1±0.0 | 0.1±0.0 | 0.2±0.0 | - | - | - |
| Δ5,9,17-24:3 | 0.1±0.0 | 0.3±0.1 | 0.2±0.0 | - | - | - |
| 24:4n-3      | 0.1±0.0 | 0.2±0.1 | 0.2±0.1 | - | - | - |

**Table S17.** The composition of the main total lipids FA (%) of Vietnam hard corals [68].

| FA            | Coral species |      |      |      |      |      |      |      |      |      |      |      |      |      |      |      |      |      |      |      |
|---------------|---------------|------|------|------|------|------|------|------|------|------|------|------|------|------|------|------|------|------|------|------|
|               | 1             | 2    | 3    | 4    | 5    | 6    | 7    | 8    | 9    | 10   | 11   | 12   | 13   | 14   | 15   | 16   | 17   | 18   | 19   | 20   |
| 14:0          | 6.0           | 4.9  | 6.0  | 5.7  | 4.3  | 6.7  | 3.7  | 4.8  | 5.6  | 1.9  | 3.0  | 3.1  | 0.7  | 1.5  | 2.1  | 1.7  | 3.2  | 2.3  | 4.3  | 3.0  |
| 16:0          | 31.5          | 28.6 | 33.4 | 30.2 | 21.8 | 29.8 | 22.3 | 26.9 | 29.8 | 43.7 | 28.5 | 36.7 | 9.5  | 12.4 | 28.4 | 28.0 | 21.2 | 31.5 | 30.9 | 39.1 |
| 16:1n-7       | 3.7           | 2.8  | 3.4  | 3.0  | 2.1  | 3.9  | 1.8  | 3.4  | 3.5  | 1.7  | 3.1  | 2.8  | 3.2  | 3.3  | 1.9  | 2.7  | 3.2  | 2.2  | 2.5  | 4.2  |
| 7-Me-16:1n-10 | 0.1           | 0.1  | 0.1  | 0.1  | 0.1  | 0.1  | 0.1  | -    | 0.1  | -    | 0.1  | -    | 1.8  | 2.3  | 0.6  | 0.6  | 0.5  | 0.3  | 0.2  | -    |
| 18:0          | 3.8           | 6.4  | 4.4  | 5.8  | 7.4  | 4.7  | 6.1  | 3.5  | 3.0  | 5.7  | 6.2  | 6.6  | 6.1  | 8.2  | 8.2  | 7.1  | 5.7  | 7.0  | 6.4  | 4.8  |
| 18:1n-9       | 7.0           | 5.8  | 9.7  | 7.9  | 4.2  | 7.4  | 6.8  | 9.5  | 9.1  | 4.2  | 4.9  | 4.3  | 20.5 | 12.8 | 5.2  | 7.0  | 10.4 | 8.6  | 7.8  | 6.3  |
| 18:1n-7       | 0.3           | 0.3  | 0.4  | 0.4  | 0.3  | 0.5  | 0.2  | 0.5  | 0.4  | 1.2  | 1.1  | 1.0  | 3.4  | 2.7  | 0.7  | 1.0  | 1.9  | 1.3  | 1.4  | 1.0  |
| 18:2n-6       | 1.5           | 1.8  | 2.1  | 1.8  | 1.4  | 1.7  | 2.6  | 2.0  | 2.5  | 1.7  | 2.6  | 1.5  | 1.5  | 1.5  | 1.0  | 1.8  | 1.7  | 0.8  | 1.4  | 2.3  |
| 18:3n-6       | 10.9          | 9.7  | 10.8 | 9.7  | 8.0  | 9.4  | 12.5 | 12.4 | 15.0 | 9.3  | 11.9 | 10.5 | 0.9  | 0.8  | 7.1  | 10.2 | 5.6  | 4.6  | 5.3  | 6.2  |
| 18:4n-3       | 4.1           | 3.0  | 2.2  | 3.2  | 5.7  | 3.1  | 2.9  | 2.6  | 2.3  | 2.1  | 3.2  | 2.9  | 0.6  | 0.7  | 3.5  | 3.1  | 1.6  | 1.4  | 1.0  | 1.4  |
| 20:0          | 0.6           | 0.7  | 0.6  | 0.6  | 1.1  | 0.6  | 0.7  | 0.5  | 0.5  | 0.7  | 0.4  | 0.6  | 0.6  | 0.7  | 1.1  | 0.8  | 0.9  | 0.9  | 1.1  | 0.4  |
| 20:1n-9       | 3.3           | 2.9  | 3.4  | 3.8  | 3.3  | 3.2  | 3.8  | 4.0  | 3.5  | 0.3  | 0.2  | 0.1  | 1.9  | 1.7  | 3.2  | 3.9  | 6.3  | 4.6  | 3.8  | 0.2  |
| 20:1n-7       | -             | -    | -    | 0.1  | -    | 0.1  | -    | 0.1  | -    | 0.1  | -    | -    | 0.6  | 0.4  | 0.2  | 0.2  | 0.5  | 0.2  | 0.3  | -    |
| 20:2n-6       | 0.4           | 1.0  | 0.5  | 0.8  | 0.7  | 0.5  | 0.7  | 0.5  | 0.5  | 0.4  | 0.2  | 0.2  | 0.9  | 0.8  | 0.6  | 0.5  | 0.4  | 1.1  | 0.3  | 1.0  |
| 20:3n-6       | 1.4           | 1.2  | 1.9  | 1.5  | 1.1  | 1.3  | 1.4  | 1.6  | 1.4  | 2.4  | 1.5  | 1.8  | 1.1  | 1.0  | 2.2  | 2.9  | 3.4  | 3.0  | 4.5  | 4.4  |
| 20:4n-6       | 4.1           | 6.8  | 2.8  | 4.2  | 9.9  | 3.2  | 7.3  | 2.6  | 2.5  | 5.6  | 10.0 | 6.8  | 10.9 | 11.7 | 11.1 | 9.8  | 7.9  | 4.8  | 6.3  | 10.1 |
| 20:4n-3       | 0.2           | 0.2  | 0.4  | 0.3  | 0.2  | 0.4  | 0.3  | 0.4  | 0.4  | 0.5  | 0.1  | 0.2  | 0.5  | 0.4  | 0.4  | 0.7  | 1.0  | 1.0  | 1.3  | 0.4  |
| 20:5n-3       | 3.7           | 3.1  | 2.9  | 3.5  | 6.2  | 5.6  | 5.7  | 4.1  | 4.0  | 1.2  | 2.6  | 1.3  | 7.3  | 7.1  | 3.1  | 2.1  | 1.8  | 1.8  | 1.3  | 2.4  |
| 22:0          | 0.1           | 0.7  | -    | 0.1  | 0.3  | 0.1  | 0.2  | 0.1  | 0.1  | 0.1  | 0.2  | 0.4  | -    | -    | 0.3  | 0.1  | 0.1  | -    | 0.1  | 0.2  |
| 22:1n-9       | 0.1           | -    | -    | 0.1  | 0.2  | 0.1  | 0.1  | 0.1  | 0.1  | -    | -    | -    | 1.2  | 0.6  | 0.8  | 0.7  | 1.1  | 0.7  | 0.5  | -    |
| 22:4n-6       | 1.8           | 3.4  | 1.8  | 2.5  | 5.2  | 2.0  | 3.8  | 1.7  | 1.3  | 3.1  | 3.9  | 2.7  | 6.7  | 8.4  | 4.9  | 3.6  | 2.9  | 1.5  | 1.8  | 1.8  |
| 22:5n-6       | -             | -    | -    | -    | -    | -    | -    | 3.0  | -    | -    | -    | -    | -    | -    | -    | -    | -    | -    | -    | -    |
| 22:4n-3       | -             | -    | -    | -    | -    | -    | -    | 0.6  | -    | -    | -    | -    | -    | -    | 0.1  | 0.2  | 0.2  | -    | 0.3  | -    |
| 22:5n-3       | 1.8           | 1.9  | 1.9  | 1.7  | 2.8  | 2.9  | 3.4  | 1.7  | 2.4  | 8.1  | 4.9  | 4.3  | 13.0 | 11.8 | 1.1  | 1.2  | 2.7  | 2.4  | 2.2  | 0.4  |
| 22:6n-3       | 7.6           | 7.0  | 7.1  | 5.9  | 6.4  | 6.4  | 9.1  | 9.3  | 8.7  | 3.6  | 7.9  | 6.4  | 1.7  | 1.2  | 5.9  | 6.2  | 10.0 | 12.9 | 9.7  | 9.6  |
| Other         | 6.0           | 7.7  | 4.2  | 7.1  | 7.3  | 6.1  | 4.5  | 7.1  | 3.3  | 2.4  | 3.5  | 5.8  | 5.4  | 8.0  | 6.3  | 3.9  | 5.8  | 5.1  | 5.3  | 0.8  |

**Table S17.** (continued).

| Fatty acid | Coral species |     |     |     |     |     |     |     |     |     |     |     |     |     |     |     |     |     |     |     |
|------------|---------------|-----|-----|-----|-----|-----|-----|-----|-----|-----|-----|-----|-----|-----|-----|-----|-----|-----|-----|-----|
|            | 21            | 22  | 23  | 24  | 25  | 26  | 27  | 28  | 29  | 30  | 31  | 32  | 33  | 34  | 35  | 36  | 37  | 38  | 39  | 40  |
| 14:0       | 2.4           | 5.0 | 2.6 | 5.4 | 3.3 | 2.0 | 3.6 | 2.9 | 4.4 | 3.0 | 3.2 | 4.7 | 2.7 | 1.7 | 2.7 | 3.2 | 2.9 | 3.2 | 2.8 | 2.2 |

|               |      |      |      |      |      |      |      |      |      |      |      |      |      |      |      |      |      |      |      |      |
|---------------|------|------|------|------|------|------|------|------|------|------|------|------|------|------|------|------|------|------|------|------|
| 16:0          | 37.5 | 32.6 | 27.5 | 55.2 | 32.8 | 34.7 | 25.6 | 37.1 | 25.8 | 35.7 | 21.2 | 31.8 | 18.4 | 34.1 | 60.6 | 51.0 | 40.9 | 49.3 | 27.2 | 31.3 |
| 16:1n-7       | 3.2  | 3.3  | 3.4  | 2.9  | 3.0  | 2.0  | 3.9  | 2.9  | 5.7  | 3.2  | 3.2  | 5.5  | 4.7  | 2.0  | 1.3  | 1.6  | 2.3  | -    | 3.4  | 2.0  |
| 7-Me-16:1n-10 | 0.1  | 0.2  | 0.1  | 0.1  | 0.3  | 0.2  | 0.3  | -    | 0.4  | 0.2  | 0.5  | 0.3  | 0.3  | 0.3  | -    | -    | 0.1  | -    | 0.3  | 0.3  |
| 18:0          | 6.8  | 4.1  | 4.4  | 9.4  | 6.7  | 6.3  | 5.3  | 6.4  | 3.8  | 4.2  | 5.7  | 5.2  | 3.6  | 8.9  | 8.6  | 9.5  | 7.5  | 9.1  | 5.8  | 7.7  |
| 18:1n-9       | 5.7  | 5.1  | 6.8  | 3.9  | 7.9  | 6.6  | 6.2  | 4.8  | 6.3  | 7.5  | 10.4 | 7.9  | 8.8  | 5.3  | 3.4  | 3.3  | 4.9  | 4.3  | 8.6  | 8.3  |
| 18:1n-7       | 1.0  | 1.0  | 1.4  | 1.7  | 1.9  | 1.8  | 2.2  | 2.1  | 2.2  | 2.0  | 1.9  | 3.0  | 2.7  | 0.9  | 0.5  | 0.7  | 0.8  | 0.6  | 2.0  | 0.8  |
| 18:2n-6       | 2.1  | 3.8  | 2.7  | 1.3  | 2.3  | 1.4  | 2.1  | 1.2  | 2.2  | 1.9  | 1.7  | 2.2  | 2.8  | 1.5  | 1.1  | 1.0  | 2.2  | 1.2  | 3.6  | 2.2  |
| 18:3n-6       | 6.4  | 9.4  | 11.3 | 3.8  | 9.6  | 6.5  | 6.4  | 6.5  | 8.4  | 6.6  | 5.6  | 6.5  | 11.3 | 5.5  | 5.6  | 6.3  | 8.1  | 8.1  | 9.8  | 12.6 |
| 18:4n-3       | 1.8  | 2.2  | 2.6  | 0.4  | 1.3  | 2.4  | 3.3  | 2.8  | 2.3  | 2.1  | 1.6  | 1.7  | 2.7  | 1.5  | 0.6  | 0.8  | 1.3  | 0.5  | 1.7  | 1.5  |
| 20:0          | 0.6  | 2.3  | 0.7  | 0.5  | 0.5  | 0.7  | 0.6  | 0.8  | 0.5  | 0.5  | 0.9  | 0.4  | 0.5  | 1.1  | 0.9  | 0.9  | 0.8  | 1.0  | 0.6  | 1.1  |
| 20:1n-9       | 0.3  | 0.6  | 1.0  | 0.8  | 1.8  | 1.8  | 2.0  | 1.0  | 0.8  | 1.4  | 6.3  | 1.4  | 1.4  | 0.5  | 0.3  | 0.3  | 0.4  | 0.4  | 1.0  | 0.8  |
| 20:1n-7       | -    | 0.1  | 0.2  | 0.2  | 0.2  | 0.2  | 0.3  | 0.2  | 0.3  | 0.2  | 0.5  | 0.3  | 0.2  | -    | -    | -    | -    | -    | 0.2  | -    |
| 20:2n-6       | 0.9  | 1.2  | 0.7  | 0.5  | 0.4  | 0.5  | 0.7  | 0.3  | 0.4  | 0.6  | 0.4  | 0.6  | 0.6  | 0.5  | 0.2  | 0.2  | 0.4  | 0.2  | 0.8  | 0.3  |
| 20:3n-6       | 3.3  | 1.9  | 3.3  | 1.3  | 2.6  | 3.1  | 3.0  | 2.3  | 2.1  | 2.5  | 3.4  | 1.2  | 3.2  | 1.8  | 1.7  | 2.2  | 3.0  | 3.2  | 3.6  | 3.1  |
| 20:4n-6       | 12.3 | 8.0  | 8.0  | 2.9  | 5.9  | 4.8  | 6.2  | 5.5  | 7.4  | 4.1  | 7.9  | 5.3  | 9.1  | 10.1 | 2.6  | 4.0  | 5.3  | 4.0  | 5.8  | 7.6  |
| 20:4n-3       | 0.3  | 0.2  | 0.5  | 0.1  | 0.3  | 0.5  | 0.6  | 0.5  | 0.3  | 0.4  | 1.0  | 0.2  | 0.6  | 0.1  | 0.1  | 0.2  | 0.2  | 0.1  | 0.5  | 0.2  |
| 20:5n-3       | 2.5  | 2.1  | 2.1  | 0.6  | 1.5  | 1.7  | 5.2  | 2.0  | 3.9  | 3.0  | 1.8  | 3.8  | 2.1  | 2.2  | 1.1  | 1.7  | 2.1  | 1.3  | 1.0  | 2.3  |
| 22:0          | 0.3  | 0.4  | 0.1  | 0.1  | 0.1  | 0.2  | 0.2  | 0.2  | 0.1  | -    | 0.1  | -    | 0.1  | 0.3  | 0.3  | 0.3  | 0.3  | 0.4  | -    | 0.3  |
| 22:1n-9       | -    | 0.3  | 0.2  | 0.1  | 0.5  | 0.3  | 0.3  | 0.1  | 0.1  | 0.3  | 1.1  | -    | 0.3  | 0.1  | -    | -    | -    | 0.1  | 0.2  | -    |
| 22:4n-6       | 3.4  | 3.8  | 1.8  | 1.0  | 1.9  | 1.5  | 1.5  | 2.4  | 2.9  | 1.4  | 2.9  | 1.4  | 3.2  | 5.3  | 1.3  | 2.0  | 2.8  | 2.2  | 2.7  | 3.7  |
| 22:5n-6       | -    | -    | -    | -    | -    | -    | -    | -    | -    | -    | -    | -    | -    | -    | -    | -    | -    | -    | -    | -    |
| 22:4n-3       | -    | -    | -    | -    | -    | -    | -    | 0.1  | 0.1  | -    | 0.2  | -    | -    | -    | -    | -    | -    | -    | -    | -    |
| 22:5n-3       | 0.4  | 2.6  | 1.1  | 0.5  | 2.2  | 0.5  | 0.3  | 0.9  | 3.0  | 0.7  | 2.7  | 3.5  | 7.4  | 4.3  | 1.5  | 2.1  | 2.5  | 1.9  | 9.4  | 1.3  |
| 22:6n-3       | 7.6  | 5.5  | 14.1 | 4.2  | 10.4 | 16.5 | 17.2 | 11.6 | 10.1 | 14.2 | 10.0 | 6.2  | 9.7  | 6.3  | 4.6  | 7.4  | 9.3  | 6.1  | 3.6  | 8.2  |
| Other         | 1.1  | 4.3  | 3.4  | 3.1  | 2.6  | 3.8  | 3.0  | 5.4  | 6.5  | 4.3  | 5.8  | 6.9  | 3.6  | 5.7  | 1.0  | 1.3  | 1.9  | 2.8  | 5.4  | 2.2  |

Table S17. (continued).

| Fatty acid         | Coral species |      |      |      |      |      |      |      |      |
|--------------------|---------------|------|------|------|------|------|------|------|------|
|                    | 41            | 42   | 43   | 44   | 45   | 46   | 47   | 48   | 49   |
| 14:0               | 2.1           | 3.4  | 3.6  | 2.8  | 5.4  | 2.1  | 1.5  | 1.0  | 3.6  |
| 16:0               | 28.7          | 29.2 | 41.0 | 16.0 | 37.0 | 25.7 | 17.3 | 26.2 | 24.2 |
| 16:1n-7            | 3.5           | 5.2  | 2.5  | 2.2  | 2.8  | 2.4  | 1.0  | 0.9  | 10.6 |
| 7-Me-16:1n-10      | 0.2           | 0.1  | 0.2  | 0.5  | 0.4  | 0.2  | -    | 0.1  | 0.2  |
| 18:0               | 6.6           | 3.9  | 7.2  | 5.7  | 8.6  | 5.2  | 4.7  | 5.5  | 4.9  |
| 18:1n-9            | 6.5           | 12.3 | 4.3  | 5.4  | 4.5  | 16.9 | 21.5 | 21.0 | 4.4  |
| 18:1n-7            | 1.2           | 1.2  | 1.2  | 2.9  | 5.3  | 1.0  | 0.5  | 0.5  | 1.9  |
| 18:2n-6            | 1.5           | 3.2  | 3.0  | 1.9  | 1.1  | 1.1  | 1.2  | 0.7  | 3.0  |
| 18:3n-6            | 13.5          | 9.7  | 6.8  | 5.6  | 3.7  | 3.3  | 2.3  | 2.2  | 11.0 |
| 18:4n-3            | 1.0           | 2.0  | 1.8  | 2.0  | 0.6  | 2.0  | 3.8  | 2.2  | 2.2  |
| 20:0               | 0.8           | 0.4  | 0.6  | 0.9  | 0.6  | 0.3  | 0.3  | 0.2  | 0.6  |
| 20:1n-9            | 0.5           | 1.0  | 0.4  | 4.3  | 2.5  | 4.0  | 4.6  | 1.6  | 0.1  |
| 20:1n-7            | -             | 0.1  | 0.1  | 1.0  | 1.2  | 0.1  | -    | -    | 0.2  |
| 20:2n-6            | 0.4           | 0.6  | 0.3  | 1.4  | 1.0  | 0.8  | 1.4  | 0.9  | 0.6  |
| 20:3n-6            | 4.0           | 3.2  | 2.1  | 5.8  | 2.7  | 0.8  | 0.4  | 0.9  | 3.6  |
| 20:4n-6            | 7.1           | 6.8  | 5.9  | 11.2 | 6.6  | 6.1  | 7.8  | 7.4  | 9.4  |
| 20:4n-3            | 0.2           | 0.4  | 0.3  | 1.6  | 0.3  | 0.2  | 0.2  | 0.4  | 0.2  |
| 20:5n-3            | 2.4           | 1.7  | 1.2  | 2.9  | 0.9  | 4.4  | 2.9  | 2.6  | 2.0  |
| 22:0               | 0.2           | -    | 0.1  | 0.3  | 0.1  | 0.1  | -    | 0.2  | 0.1  |
| 22:1n-9            | 0.1           | 0.1  | 0.1  | 1.3  | 0.6  | 0.5  | 0.5  | 0.3  | -    |
| 22:4n-6            | 3.5           | 1.0  | 2.8  | 2.2  | 1.6  | 2.9  | 5.8  | 4.8  | 5.5  |
| 22:5n-6            | -             | -    | -    | -    | -    | -    | -    | -    | -    |
| 22:4n-3            | -             | -    | -    | 0.1  | -    | -    | -    | -    | 1.4  |
| 22:5n-3            | 2.1           | 1.5  | 9.4  | 0.5  | 0.2  | 1.4  | 6.1  | 2.6  | 0.1  |
| 22:6n-3            | 10.9          | 8.3  | 2.7  | 14.8 | 8.3  | 14.7 | 11.3 | 14.7 | 6.2  |
| Other <sup>b</sup> | 3.0           | 4.7  | 2.4  | 6.6  | 4.0  | 3.8  | 4.9  | 3.1  | 4.0  |

Species numbers as is showed in Table 10. b 12:0, 14:1, i-15:0, ai-15:0, 15:0, 15:1, i-16:0, ai-16:0, 16:1n-9, 16:1n-5, i-17:0, 16:2n-7, 17:0, 16:3n-4, i-18:0, 18:2, 18:2n-7, 19:0, 18:3n-4, 20:2n-7, 22:2NMI, 22:3n-6, 22:1n-7.

Table S18. The FA composition (%) of total lipids of three gorgonian corals species of Vietnam [87].

| Fatty acid | <i>Psammogorgia nodosa</i> | <i>Bebryce indica</i> | <i>Mopsella aurantia</i> | Fatty acid | <i>Psammogorgia nodosa</i> | <i>Bebryce indica</i> | <i>Mopsella aurantia</i> |
|------------|----------------------------|-----------------------|--------------------------|------------|----------------------------|-----------------------|--------------------------|
| 14:0       | 1.7                        | 2.2                   | 1.3                      | 20:1       | 1.1                        | -                     | -                        |
| 15:0       | -                          | -                     | 1.0                      | 20:4n-6    | 5.1                        | 29.1                  | 40.9                     |
| 16:0       | 52.7                       | 15.1                  | 6.4                      | 20:4n-3    | -                          | 1.1                   | -                        |
| 16:1       | 2.4                        | 4.0                   | 3.1                      | 20:5n-3    | -                          | 4.1                   | 7.6                      |
| 16:2       | 1.5                        | 4.4                   | -                        | 22:1       | 1.1                        | -                     | -                        |
| 17:0       | -                          | 2.1                   | 3.1                      | 22:3n-9    | -                          | 4.5                   | -                        |
| 18:0       | 16.5                       | 10.9                  | 5.8                      | 22:3n-6    | -                          | -                     | 1.1                      |

|         |      |     |     |         |   |     |     |
|---------|------|-----|-----|---------|---|-----|-----|
| 18:1    | 4.8  | 7.6 | 5.4 | 22:4n-6 | - | -   | 1.4 |
| 18:3n-6 | -    | -   | 2.5 | 22:5n-6 | - | 2.2 | 4.9 |
| 18:4n-3 | -    | 1.1 | 1.1 | 22:5n-3 | - | -   | 1.4 |
| 20:0    | 11.0 | 1.6 | 1.0 | 22:6n-3 | - | 5.0 | 3.8 |

**Table S19.** The total lipids FA composition (%) of the gorgonian *Paragorgia arborea*, alcyonarians *Eunephthya* sp. and *Sarcophyton* sp. [104].

| Fatty acid | Gorgonaria                | Alcyonaria            |                        |
|------------|---------------------------|-----------------------|------------------------|
|            | <i>Paragorgia arborea</i> | <i>Eunephthya</i> sp. | <i>Sarcophyton</i> sp. |
| 14:0       | 1.1                       | 1.9                   | 1.3                    |
| 15:0       | -                         | 0.2                   | 0.3                    |
| 15:1       | -                         | 0.1                   | -                      |
| i-16:0     | -                         | 0.1                   | 0.2                    |
| 16:0       | 7.1                       | 7.2                   | 29.6                   |
| 16:1       | 3.2                       | 2.3                   | 2.4                    |
| i-17:0     | -                         | 0.4                   | -                      |
| ai-17:0    | -                         | 0.6                   | 4.6                    |
| 17:0       | 0.6                       | 1.2                   | 6.6                    |
| 17:1       | 0.5                       | 0.2                   | 1.1                    |
| i-18:0     | 0.5                       | 0.2                   | -                      |
| 18:0       | 3.4                       | 0.6                   | 7.8                    |
| 18:1n-9    | 11.1                      | 21.1                  | 1.7                    |
| 18:1n-7    | -                         | 0.9                   | -                      |
| 18:2n-6    | 0.3                       | 0.9                   | 1.4                    |
| 18:3n-3    | -                         | 0.9                   | 0.3                    |
| 18:4n-3    | 0.4                       | 1.4                   | 4.7                    |
| 20:0       | -                         | 1.7                   | -                      |
| 20:1       | 9.6                       | 8.2                   | -                      |
| 20:2n-6    | 0.2                       | 0.6                   | 0.3                    |
| 20:3n-3    | -                         | 0.7                   | 0.3                    |
| 20:3n-6    | -                         | 0.6                   | 2.0                    |
| 20:4n-3    | 0.7                       | 2.8                   | 2.1                    |
| 20:4n-6    | 20.2                      | 5.4                   | 15.7                   |
| 20:5n-3    | 8.7                       | 14.1                  | 1.6                    |
| 22:1n-9    | 6.1                       | 1.6                   | -                      |
| 22:2n-6    | -                         | 0.5                   | -                      |
| 22:4n-6    | 0.8                       | 0.2                   | 4.9                    |
| 22:5n-6    | 0.4                       | 0.1                   | 0.6                    |
| 22:5n-3    | 0.4                       | 0.9                   | -                      |
| 22:6n-3    | 1.9                       | 9.9                   | 1.7                    |
| 24:1n-9    | 0.8                       | 1.7                   | -                      |

|         |      |     |     |
|---------|------|-----|-----|
| 24:5n-6 | 15.6 | 2.6 | 5.3 |
| 24:6n-3 | 6.0  | 7.6 | 1.5 |

**Table S20.** The total lipids FA composition (%) of gorgonians (winter) from the Nha Trang Bay (Vietnam, the South China Sea) [46].

| Fatty acid | <i>Euplexaura erecta</i> | <i>Nicaule crucifera</i> | Plexauridae spp. 1 | Plexauridae spp. 2 | <i>Subergorgia suberosa</i> | <i>Junceella fragilis</i> | <i>Junceella juncea</i> | <i>Rumphella aggregata</i> |
|------------|--------------------------|--------------------------|--------------------|--------------------|-----------------------------|---------------------------|-------------------------|----------------------------|
| 14:0       | 1.8                      | 0.9                      | 2.3                | 1.0                | 1.4                         | 0.3                       | 1.2                     | 1.5                        |
| 15:0       | 0.4                      | 0.7                      | -                  | -                  | 1.3                         | -                         | -                       | -                          |
| 16:0       | 9.0                      | 7.2                      | 9.5                | 6.9                | 10.4                        | 18.9                      | 7.0                     | 13.5                       |
| 16:1       | 3.4                      | 2.9                      | 3.5                | 2.3                | 4.4                         | 0.8                       | 2.6                     | 2.5                        |
| 16:2       | 4.5                      | 1.9                      | 5.0                | 2.2                | 5.2                         | 1.1                       | 2.5                     | 6.3                        |
| 16:3       | -                        | -                        | 0.3                | -                  | 5.1                         | -                         | 0.2                     | -                          |
| 18:0       | 5.1                      | 5.2                      | 6.3                | 3.5                | 7.3                         | 12.2                      | 6.9                     | 4.5                        |
| 18:1       | 3.5                      | 4.7                      | 3.7                | 5.3                | 11.9                        | 3.5                       | 3.2                     | 2.3                        |
| 18:2n-6    | 0.7                      | 0.8                      | 0.8                | 1.6                | 1.1                         | 4.4                       | 1.0                     | 1.2                        |
| 18:3n-6    | -                        | 1.2                      | 0.4                | -                  | -                           | -                         | 0.4                     | 1.9                        |
| 18:3n-3    | 0.8                      | 2.1                      | 0.9                | 0.6                | 0.9                         | 0.3                       | 1.1                     | 0.9                        |
| 20:0       | 1.0                      | 0.2                      | 1.0                | 0.9                | 1.6                         | 7.9                       | 1.1                     | 6.0                        |
| 20:3n-6    | 0.2                      | -                        | -                  | 0.4                | 0.7                         | -                         | -                       | 1.7                        |
| 20:4n-6    | 41.3                     | 33.4                     | 43.3               | 50.5               | 27.3                        | 25.7                      | 47.9                    | 40.5                       |
| 20:4n-3    | 0.6                      | -                        | 0.3                | 2.5                | 0.8                         | -                         | -                       | 0.7                        |
| 20:5n-3    | 7.8                      | 4.7                      | 4.3                | 6.6                | 3.1                         | 6.2                       | 4.6                     | 4.0                        |
| 22:4n-6    | 0.7                      | 1.0                      | 1.1                | 1.9                | 1.4                         | 8.7                       | 8.4                     | 1.6                        |
| 22:5n-3    | -                        | 1.2                      | -                  | 0.6                | 1.2                         | 0.3                       | 0.8                     | -                          |
| 22:6n-3    | 3.1                      | 5.1                      | 2.2                | 1.4                | 3.0                         | 7.4                       | 2.0                     | 2.7                        |
| 24:5n-6    | 1.2                      | 2.7                      | 1.1                | 1.8                | 2.0                         | 1.5                       | 2.0                     | 0.5                        |
| 24:5n-3    | 12.0                     | 18.4                     | 13.2               | 9.6                | 7.6                         | -                         | 6.7                     | 7.1                        |
| 24:6n-3    | 2.3                      | 1.9                      | -                  | -                  | -                           | -                         | -                       | -                          |

**Table S21.** The total lipids FA composition (%) of alcyonarians from the Nha Trang Bay (Vietnam, the South China Sea) [46,106].

| Fatty acid | <i>Simularia flexibilis</i> | <i>Simularia capillosa</i> | <i>Sarcophyton crassocaule</i> | <i>Simularia leptoclados</i> | <i>Simularia</i> sp. | <i>Sarcophyton</i> aff. <i>glaucom</i> | <i>Sarcophyton</i> sp. 1 | <i>Sarcophyton</i> sp. 2 | <i>Sarcophyton</i> sp. 3 | <i>Cladiella</i> sp. 1 | <i>Cladiella</i> sp. 2 |
|------------|-----------------------------|----------------------------|--------------------------------|------------------------------|----------------------|----------------------------------------|--------------------------|--------------------------|--------------------------|------------------------|------------------------|
| 14:0       | 0.8                         | 0.9                        | 1.3                            | 0.5                          | -                    | 2.2                                    | 8.0                      | 2.5                      | 3.9                      | 6.0                    | 1.6                    |
| 15:0       | -                           | 1.1                        | -                              | -                            | -                    | -                                      | 0.9                      | 0.6                      | 0.4                      | 0.4                    | 0.1                    |
| 16:0       | 29.1                        | 20.5                       | 28.3                           | 53.5                         | 27.2                 | 30.5                                   | 50.9                     | 57.6                     | 30.2                     | 26.6                   | 44.7                   |

|         |      |      |      |      |      |      |     |      |      |      |      |
|---------|------|------|------|------|------|------|-----|------|------|------|------|
| 16:1    | 1.0  | 2.0  | 1.4  | 0.3  | 0.9  | 2.1  | 5.8 | 4.2  | 6.5  | 6.6  | 3.6  |
| 16:2    | 6.1  | 6.2  | 3.8  | 7.1  | 6.7  | 8.9  | 0.9 | 0.9  | 0.6  | 0.4  | 0.1  |
| 17:0    | -    | -    | -    | -    | -    | -    | 0.7 | 7.5  | 0.5  | 1.5  | 8.6  |
| 18:0    | 6.2  | 5.0  | 8.2  | 7.0  | 6.1  | 7.8  | 8.1 | 10.4 | 5.4  | 4.9  | 14.0 |
| 18:1    | 1.3  | 6.3  | 1.5  | 1.8  | 3.3  | 2.6  | 5.0 | 3.1  | 3.5  | 4.1  | 4.1  |
| 18:2n-6 | 4.2  | 2.6  | 2.1  | 3.7  | 4.3  | 3.8  | 3.0 | 2.2  | 4.4  | 1.4  | 0.3  |
| 18:3n-6 | -    | -    | -    | -    | -    | 3.4  | 5.5 | 6.1  | 12   | 14.5 | -    |
| 18:3n-3 | 0.8  | 0.7  | 0.7  | 2.0  | 0.5  | 1.7  | 0.2 | 0.2  | 0.4  | 0.1  | 0.2  |
| 18:4n-3 | -    | -    | 0.8  | -    | -    | -    | 0.8 | 1.3  | 3.2  | 0.7  | 1.7  |
| 20:0    | 6.9  | 6.8  | 6.1  | 4.4  | 4.8  | 7.6  | 0.7 | 1.2  | 0.6  | 0.9  | 1.2  |
| 20:1    | 0.8  | 26.3 | 0.6  | 1.2  | 13.0 | 0.6  | 0.3 | 0.1  | 0.1  | 0.3  | 0.1  |
| 20:3n-6 | -    | -    | -    | -    | -    | -    | 0.2 | 0.1  | 0.5  | 4.0  | 0.3  |
| 20:3n-3 | -    | -    | -    | -    | -    | -    | 0.1 | 0.2  | -    | 0.4  | 0.3  |
| 20:4n-6 | 30.1 | 14.9 | 30.4 | 11.2 | 18.2 | 17.6 | 3.5 | 3.6  | 11.0 | 8.3  | 3.3  |
| 20:4n-3 | 1.9  | -    | 0.3  | 1.0  | 0.7  | 0.4  | 0.2 | 0.4  | 1.0  | 1.6  | 1.1  |
| 20:5n-3 | 3.3  | 1.1  | 1.9  | 1.1  | 1.4  | 2.6  | 1.1 | 0.9  | 4.0  | 3.3  | 1.2  |
| 22:4n-6 | -    | 0.7  | -    | -    | -    | -    | -   | 0.4  | 0.1  | 0.3  | -    |
| 22:5n-3 | -    | -    | -    | -    | -    | 2.2  | 0   | 0.3  | 0.2  | 0.3  | -    |
| 22:6n-3 | 2.1  | 1.6  | 2.3  | 2.1  | 0.6  | 1.0  | 3.7 | 0.8  | 6.1  | 5.1  | 1.3  |
| 24:5n-6 | -    | -    | -    | -    | -    | -    | 4.2 | 1.0  | 2.0  | 1.6  | 0.5  |
| 24:5n-3 | 5.0  | 2.6  | 9.3  | 2.6  | 10.6 | 4.2  | -   | -    | -    | -    | -    |
| 24:6n-3 | -    | -    | -    | -    | -    | -    | 1.0 | 0.5  | 1.7  | 1.6  | -    |

**Table S22.** The FA composition (%; mean  $\pm$  SD) of the total (TL,  $n = 6$ ), neutral (NL,  $n = 4$ ) and polar (PL,  $n = 4$ ) lipids of the cold-water alcyonarian *Gersemia rubiformis* from the Bering Sea.

| Fatty acid | TL            | NL             | PL            |
|------------|---------------|----------------|---------------|
| 14:0       | 1.0 $\pm$ 0.4 | 1.4 $\pm$ 0.1  | 0.6 $\pm$ 0.1 |
| 15:0       | 0.3 $\pm$ 0.1 | 0.3 $\pm$ 0.1  | 0.2 $\pm$ 0.0 |
| 15:1       | 0.2 $\pm$ 0.1 | 0.1 $\pm$ 0.0  | 0.6 $\pm$ 0.5 |
| 16:0       | 7.4 $\pm$ 2.2 | 10.4 $\pm$ 1.9 | 5.5 $\pm$ 2.1 |
| 16:1n-9    | 0.5 $\pm$ 0.2 | 0.6 $\pm$ 0.0  | 0.3 $\pm$ 0.0 |
| 16:1n-7    | 2.9 $\pm$ 0.8 | 3.8 $\pm$ 0.0  | 1.2 $\pm$ 0.3 |
| 16:1n-5    | 0.1 $\pm$ 0.0 | 0.1 $\pm$ 0.0  | 0.1 $\pm$ 0.0 |
| i-17:0     | 0.2 $\pm$ 0.1 | 0.2 $\pm$ 0.1  | 0.2 $\pm$ 0.0 |
| 16:2       | 0.3 $\pm$ 0.2 | 0.3 $\pm$ 0.1  | 0.1 $\pm$ 0.0 |
| br-17:1    | 0.7 $\pm$ 0.1 | 1.3 $\pm$ 0.3  | 0.4 $\pm$ 0.2 |
| 16:3       | 0.5 $\pm$ 0.1 | 1.0 $\pm$ 0.3  | 0.4 $\pm$ 0.0 |
| 17:0       | 0.1 $\pm$ 0.1 | 0.2 $\pm$ 0.1  | 0.1 $\pm$ 0.0 |
| 17:1n-9    | 0.9 $\pm$ 0.8 | 0.2 $\pm$ 0.2  | 0.4 $\pm$ 0.2 |
| 18:0       | 1.4 $\pm$ 0.5 | 1.4 $\pm$ 0.4  | 1.3 $\pm$ 0.3 |
| 18:1n-9    | 3.8 $\pm$ 1.0 | 5.8 $\pm$ 1.3  | 1.5 $\pm$ 0.2 |

|              |            |            |            |
|--------------|------------|------------|------------|
| 18:1n-7      | 3.0 ± 0.9  | 3.5 ± 0.2  | 2.0 ± 0.1  |
| 18:2n-6      | 1.0 ± 0.3  | 2.0 ± 0.7  | 0.4 ± 0.1  |
| br-19:1      | 0.2 ± 0.1  | 0.2 ± 0.0  | 0.1 ± 0.0  |
| 18:3n-3      | 0.3 ± 0.1  | 0.7 ± 0.3  | 0.1 ± 0.0  |
| 19:2+18:4n-3 | 0.8 ± 0.2  | 1.4 ± 0.4  | 0.2 ± 0.1  |
| 20:1n-11     | 0.8 ± 0.2  | 1.1 ± 0.1  | 0.4 ± 0.1  |
| 20:1n-9      | 0.9 ± 0.1  | 1.4 ± 0.6  | 0.4 ± 0.1  |
| 20:1n-7      | 9.5 ± 1.4  | 5.7 ± 0.4  | 7.2 ± 2.7  |
| Δ5,11-20:2   | 0.2 ± 0.1  | 0.3 ± 0.1  | 0.1 ± 0.0  |
| 20:2n-6      | 0.6 ± 0.1  | 0.8 ± 0.2  | 0.4 ± 0.1  |
| 20:3n-9      | 0.6 ± 0.2  | 0.6 ± 0.1  | 0.2 ± 0.0  |
| 20:4n-6      | 22.8 ± 4.7 | 10.8 ± 0.3 | 39.1 ± 3.2 |
| 20:3n-3      | 0.4 ± 0.2  | 0.5 ± 0.1  | 0.2 ± 0.0  |
| 20:4n-3      | 1.5 ± 0.7  | 2.2 ± 0.3  | 0.3 ± 0.1  |
| 20:5n-3      | 16.5 ± 3.4 | 23.1 ± 6.4 | 13.6 ± 3.9 |
| 22:1n-11     | 0.6 ± 0.1  | 0.7 ± 0.2  | 0.3 ± 0.1  |
| 22:1         | 0.2 ± 0.1  | 0.4 ± 0.1  | -          |
| 22:2n-3      | 0.6 ± 0.2  | 0.8 ± 0.0  | 0.3 ± 0.1  |
| 22:4n-6      | 0.9 ± 0.4  | 0.4 ± 0.0  | 1.2 ± 0.6  |
| 22:5n-6      | 0.2 ± 0.1  | 0.3 ± 0.0  | 0.4 ± 0.2  |
| 22:4n-3      | 0.3 ± 0.2  | 0.4 ± 0.1  | -          |
| 22:5n-3      | 1.6 ± 1.1  | 1.7 ± 0.2  | 0.5 ± 0.3  |
| 22:6n-3      | 2.0 ± 0.3  | 3.0 ± 0.0  | 2.4 ± 0.7  |
| 24:5n-6      | 5.9 ± 1.3  | 2.2 ± 0.2  | 11.4 ± 2.1 |
| 24:6n-3      | 4.4 ± 1.2  | 4.3 ± 0.5  | 4.3 ± 1.8  |

**Table S23.** The main FA composition (%) of total lipids the genus *Dendronephthya* [68,79].

| Fatty acid | <i>Dendronephthya</i>           |                                 |                           |                           |                               |                              |                                 |                               |                    |                    |                    |                    |                    |
|------------|---------------------------------|---------------------------------|---------------------------|---------------------------|-------------------------------|------------------------------|---------------------------------|-------------------------------|--------------------|--------------------|--------------------|--------------------|--------------------|
|            | <i>crystallina</i> <sup>1</sup> | <i>crystallina</i> <sup>1</sup> | <i>aurea</i> <sup>1</sup> | <i>aurea</i> <sup>1</sup> | <i>gigantean</i> <sup>1</sup> | <i>involuta</i> <sup>1</sup> | <i>cervicornis</i> <sup>2</sup> | <i>pulchella</i> <sup>2</sup> | sp. 1 <sup>1</sup> | sp. 2 <sup>1</sup> | sp. 3 <sup>1</sup> | sp. 4 <sup>1</sup> | sp. 5 <sup>2</sup> |
| 14:0       | 2.5                             | 2.7                             | 1.6                       | 2.1                       | 1.4                           | 1.5                          | 1.3                             | 1.7                           | 1.3                | 1.0                | 1.9                | 1.1                | 1.0                |
| 16:2n-7    | 0.3                             | -                               | 1.1                       | -                         | -                             | -                            | 1.1                             | 1.6                           | 0.7                | -                  | -                  | -                  | 0.6                |
| 16:1n-9    | 1.9                             | 1.0                             | 0.3                       | 0.4                       | 0.3                           | 1.8                          | 0.6                             | 0.3                           | 0.6                | 0.6                | 0.7                | 1.1                | 0.4                |
| 16:1n-7    | 3.1                             | 2.5                             | 2.5                       | 1.8                       | 2.5                           | 1.6                          | 1.3                             | 1.5                           | 2.0                | 1.3                | 1.9                | 1.2                | 0.9                |
| 16:0       | 16.3                            | 18.0                            | 12.8                      | 13.4                      | 13.5                          | 14.0                         | 11.2                            | 12.7                          | 7.5                | 6.7                | 11.8               | 7.3                | 10.0               |
| 7-Me-16:1  | 4.4                             | 7.0                             | 3.4                       | 7.3                       | 7.0                           | 3.6                          | 5.9                             | 5.0                           | 2.9                | 3.6                | 4.6                | 4.5                | 3.8                |
| br-17:0    | 2.2                             | 1.9                             | 0.7                       | 2.0                       | 1.2                           | 3.3                          | 0.8                             | 0.9                           | 1.6                | 3.1                | 1.9                | 2.8                | 1.0                |
| 18:4n-3    | 1.1                             | 0.3                             | 1.1                       | 0.1                       | 0.3                           | -                            | 0.6                             | 0.8                           | 1.1                | 0.6                | 0.6                | 0.6                | 0.4                |
| 18:2n-7    | -                               | -                               | 0.7                       | -                         | -                             | 2.8                          | 0.5                             | -                             | -                  | 3.6                | 1.2                | 3.6                |                    |
| 18:2n-6    | 1.4                             | 1.3                             | 0.9                       | 1.0                       | 1.3                           | -                            | 1.4                             | 1.1                           | 1.0                | 1.8                | 1.8                | 1.9                | 0.8                |
| 18:1n-9    | 4.5                             | 5.1                             | 2.7                       | 3.0                       | 5.0                           | 5.2                          | 3.9                             | 3.3                           | 2.4                | 3.1                | 3.9                | 3.4                | 3.0                |
| 18:1n-7    | 3.3                             | 4.1                             | 2.2                       | 2.5                       | 4.3                           | 2.8                          | 1.8                             | 1.6                           | 1.2                | 2.5                | 3.6                | 3.6                | 1.1                |



|                    |      |      |      |      |      |      |      |      |      |      |      |      |      |
|--------------------|------|------|------|------|------|------|------|------|------|------|------|------|------|
| 18:0               | 8.8  | 1.5  | 6.2  | 9.3  | 9.1  | 6.4  | 7.7  | 6.4  | 3.4  | 4.3  | 6.2  | 4.9  | 5.7  |
| 20:4n-6            | 15.7 | 27.0 | 29.4 | 28.9 | 21.1 | 25.0 | 23.4 | 28.3 | 37.7 | 30.9 | 23.4 | 21.3 | 34.7 |
| 20:5n-3            | 3.3  | 3.5  | 3.3  | 1.9  | 1.5  | 1.8  | 2.5  | 3.7  | 3.8  | 1.3  | 1.6  | 1.6  | 3.4  |
| 20:3n-6            | 0.2  | 0.3  | 0.3  | 0.2  | 0.6  | -    | 0.6  | -    | 0.5  | 0.9  | 0.6  | 0.7  | 0.4  |
| 20:4n-3            | 0.3  | 0.2  | 0.6  | 0.1  | 0.7  | -    | 0.3  | 0.5  | 0.5  | 1.1  | 0.7  | 1.6  | 0.6  |
| 20:1               | 0.3  | 1.3  | 0.6  | 0.7  | 2.3  | -    | 0.4  | -    | -    | 0.8  | 1.1  | 1.2  | -    |
| 20:0               | 0.8  | 0.1  | 0.3  | 0.1  | 0.2  | 0.7  | 1.0  | 0.4  | -    | 0.6  | 1.0  | 0.4  | 0.5  |
| 22:5n-6            | 1.2  | 0.6  | 1.9  | 0.4  | 0.9  | 1.1  | 1.8  | 1.1  | 1.8  | 2.3  | 3.2  | 1.9  | 1.2  |
| 22:6n-3            | 4.1  | 2.3  | 3.9  | 0.9  | 1.3  | 2.1  | 3.7  | 2.5  | 4.1  | 2.2  | 3.0  | 2.5  | 2.5  |
| 22:4n-6            | 0.4  | 0.3  | -    | 0.3  | 0.9  | -    | 0.8  | 1.1  | 0.8  | -    | -    | -    | 1.5  |
| 22:5n-3            | -    | -    | 0.5  | -    | 0.3  | 1.3  | -    | -    | -    | 0.9  | 0.7  | 0.7  | -    |
| 24:5n-6            | 9.6  | 9.4  | 11.6 | 12.9 | 12.4 | 12.5 | 16.5 | 11.8 | 15.0 | 16.5 | 12.3 | 15.2 | 13.0 |
| 24:6n-3            | 3.6  | 2.2  | 4.3  | 2.3  | 4.7  | 2.4  | 2.8  | 2.4  | 4.6  | 5.1  | 4.0  | 7.1  | 4.1  |
| 15:0,17:0,<br>19:0 | 2.9  | 3.1  | 1.6  | 2.7  | 2.4  | 2.9  | 2.4  | 2.0  | 1.0  | 1.7  | 2.7  | 2.0  | 2.8  |

**Table S24.** The main FA composition (%) of total lipids of the genus *Sinularia* [110].

| Fatty acid | <i>S. leptoclados</i> | <i>S. flexibilis</i> | <i>S. aff. deformis</i> | <i>S. lochmodes</i> | <i>S. cf. muralis</i> | <i>S. densa</i> | <i>S. notanda</i> | <i>S. cruciata</i> |
|------------|-----------------------|----------------------|-------------------------|---------------------|-----------------------|-----------------|-------------------|--------------------|
| 14:0       | 1.2                   | 1.8                  | 1.4                     | 2.3                 | 1.8                   | 2.1             | 1.7               | 1.4                |
| 16:0       | 26.1                  | 27.2                 | 20.6                    | 21.5                | 22.7                  | 37.4            | 26.6              | 20.7               |
| 7-Me-16:1  | 1.3                   | 1.3                  | 0.3                     | 3.6                 | 0.6                   | 1.1             | 1.3               | 0.2                |
| 16:1n-9    | 0.6                   | tr                   | 0.3                     | 0.6                 | 0.5                   | 0.3             | 0.2               | 0.3                |
| 16:1n-7    | 1.1                   | 2.7                  | 2.0                     | 2.2                 | 2.6                   | 3.5             | 2.2               | 1.7                |
| 16:2n-7    | 3.5                   | 8.6                  | 6.0                     | 10.9                | 11.2                  | 7.3             | 6.8               | 6.5                |
| 16:3n-4    | 1.2                   | 1.3                  | 0.9                     | 1.2                 | 0.6                   | 0.5             | 0.8               | 1.0                |
| 16:4n-1    | 1.0                   | 0.9                  | 0.7                     | 0.9                 | 0.7                   | 0.5             | 0.6               | 0.8                |
| 18:0       | 10.8                  | 6.6                  | 12.9                    | 2.4                 | 7.6                   | 6.3             | 8.1               | 7.1                |
| 18:1n-9    | 1.7                   | 1.6                  | 2.2                     | 1.8                 | 3.1                   | 2.6             | 1.6               | 1.7                |
| 18:1n-7    | 0.2                   | tr                   | 0.9                     | 0.0                 | 0.3                   | 0.5             | 0.4               | 0.8                |
| 18:2n-7    | 3.3                   | 5.3                  | 6.9                     | 8.4                 | 4.1                   | 2.6             | 5.4               | 3.9                |
| 18:2n-6    | tr                    | 0.2                  | 0.2                     | 0.0                 | 0.0                   | 0.6             | 0.1               | 0.2                |
| 18:3n-6    | 0.7                   | 1.4                  | 0.4                     | 0.6                 | 0.9                   | 0.8             | 0.5               | 0.8                |
| 18:4n-3    | 1.1                   | 7.2                  | 5.6                     | 4.4                 | 4.5                   | 4.8             | 5.2               | 6.2                |
| 20:0       | 1.0                   | 0.1                  | 0.8                     | 0.0                 | 1.2                   | 1.1             | 0.4               | 0.6                |
| 20:3n-6    | 1.1                   | 0.8                  | 0.4                     | 1.5                 | 0.9                   | 0.7             | 0.9               | 1.3                |
| 20:4n-6    | 23.2                  | 16.9                 | 19.1                    | 21.2                | 18.1                  | 10.2            | 19.1              | 23.8               |
| 20:3n-3    | 0.9                   | 0.2                  | 0.6                     | 0.7                 | 0.5                   | 0.3             | 0.3               | 0.3                |
| 20:4n-3    | 0.8                   | 1.1                  | 0.9                     | 1.3                 | 1.0                   | 0.6             | 1.0               | 1.1                |
| 20:5n-3    | 1.0                   | 2.1                  | 2.4                     | 2.3                 | 1.5                   | 0.8             | 2.2               | 2.2                |
| 22:6n-3    | 2.5                   | 3.0                  | 2.9                     | 2.7                 | 3.4                   | 1.9             | 3.1               | 3.9                |
| 24:5n-6    | 8.9                   | 5.3                  | 5.8                     | 6.0                 | 6.3                   | 5.6             | 7.3               | 8.4                |

|         |     |     |     |     |     |     |     |     |
|---------|-----|-----|-----|-----|-----|-----|-----|-----|
| 24:6n-3 | 0.9 | 1.1 | 1.8 | 0.9 | 1.2 | 1.2 | 1.2 | 1.2 |
|---------|-----|-----|-----|-----|-----|-----|-----|-----|

**Table S25.** The main FA composition (% of the sum) of total lipids of the genus *Simularia* [79].

| Fatty acid | <i>S. cf. robusta</i> | <i>S. aff. exilis</i> | <i>S. brassica</i> | <i>S. brassica</i> | <i>S. erecta</i> | <i>S. aff. polydactyla</i> | <i>S. siaesensis</i> | <i>S. siaesensis</i> | <i>S. gibberosa</i> | <i>Simularia sp.</i> | <i>S. polydactyla</i> | <i>S. flexibilis</i> |
|------------|-----------------------|-----------------------|--------------------|--------------------|------------------|----------------------------|----------------------|----------------------|---------------------|----------------------|-----------------------|----------------------|
| 14:0       | 2.7                   | 3.9                   | 5.8                | 5.7                | 2.0              | 1.6                        | 3.5                  | 4.7                  | 1.4                 | 2.6                  | 1.4                   | 1.4                  |
| 16:0       | 23.1                  | 25.4                  | 19.0               | 24.1               | 23.0             | 23.8                       | 17.3                 | 22.2                 | 29.8                | 46.7                 | 30.1                  | 44.7                 |
| 16:1n-7    | 2.8                   | 4.6                   | 3.8                | 4.2                | 1.9              | 1.4                        | 4.1                  | 3.9                  | 2.8                 | -                    | 1.7                   | 3.5                  |
| 16:2n-7    | 9.4                   | 0.9                   | 0.4                | 0.3                | 6.0              | 9.1                        | 2.2                  | 1.5                  | 9.3                 | 5.6                  | 5.7                   | 6.5                  |
| 7-Me-16:1  | 0.4                   | -                     | 0.3                | 0.3                | 0.8              | 0.5                        | -                    | 0.1                  | 0.2                 | -                    | 0.2                   | 0.5                  |
| 16:4       | 0.8                   | 0.8                   | 1.7                | 1.2                | 1.8              | 2.3                        | 1.4                  | 0.9                  | 0.6                 | 0.2                  | 0.4                   | 0.3                  |
| 18:0       | 3.9                   | 6.4                   | 3.3                | 3.5                | 6.5              | 4.8                        | 5.8                  | 5.3                  | 10.3                | 6.7                  | 11.0                  | 7.1                  |
| 18:1n-9    | 1.9                   | 2.4                   | 2.8                | 4.0                | 1.4              | 0.7                        | 2.1                  | 2.8                  | 3.6                 | 1.5                  | 2.9                   | 2.5                  |
| 18:1n-7    | 0.2                   | 0.9                   | 0.3                | 0.4                | 0.1              | -                          | 0.6                  | 0.4                  | 0.9                 | 0.1                  | 0.5                   | 0.3                  |
| 18:2n-7    | 1.0                   | 0.6                   | -                  | 0.1                | 2.3              | 1.4                        | 1.3                  | 0.6                  | 6.5                 | 1.3                  | 5.0                   | 3.2                  |
| 18:2n-6    | 0.4                   | 1.5                   | 1.8                | 1.8                | 0.8              | -                          | 0.9                  | 1.0                  | -                   | 0.4                  | 0.6                   | -                    |
| 18:3n-6    | 2.9                   | 14.1                  | 8.4                | 9.2                | 2.4              | -                          | 10.0                 | 11.7                 | -                   | -                    | 0.5                   | -                    |
| 18:4n-3    | 4.1                   | 2.8                   | 3.3                | 2.1                | 2.3              | 3.2                        | 2.6                  | 3.0                  | 2.7                 | 2.1                  | 2.6                   | 2.7                  |
| 20:0       | 0.6                   | 0.6                   | 0.5                | 0.9                | 1.0              | 0.7                        | 0.5                  | 0.4                  | 0.7                 | 2.7                  | 1.2                   | 0.6                  |
| 20:1n-9    | 0.2                   | 0.1                   | 0.2                | -                  | 0.1              | -                          | 0.1                  | 0.1                  | -                   | 0.2                  | 0.2                   | -                    |
| 20:3n-6    | 0.6                   | 0.9                   | 1.1                | 1.3                | 1.0              | 0.5                        | 0.8                  | 0.7                  | 0.7                 | 0.7                  | 1.1                   | 0.4                  |
| 20:4n-6    | 16.8                  | 12.7                  | 17.4               | 13.0               | 22.7             | 23.6                       | 22.5                 | 15.4                 | 11.8                | 10.8                 | 13.6                  | 9.0                  |
| 20:4n-3    | 0.7                   | 1.1                   | 0.4                | 0.5                | 1.2              | 0.7                        | 0.8                  | 0.6                  | 1.6                 | 0.9                  | 1.1                   | 1.2                  |
| 20:5n-3    | 3.4                   | 3.3                   | 3.9                | 3.1                | 3.2              | 3.6                        | 3.5                  | 6.2                  | 0.8                 | 0.6                  | 1.0                   | 0.8                  |
| 22:0       | 0.4                   | 0.5                   | 0.3                | 0.4                | 0.5              | 0.4                        | 0.3                  | 0.4                  | 0.4                 | 2.2                  | 1.3                   | 0.4                  |
| 22:4n-6    | 0.4                   | 0.3                   | -                  | -                  | 0.4              | 0.6                        | 0.6                  | 0.3                  | 0.4                 | 0.3                  | 0.5                   | -                    |
| 22:6n-3    | 6.4                   | 7.9                   | 8.2                | 11.8               | 3.0              | 3.7                        | 4.7                  | 5.5                  | 1.6                 | 1.3                  | 1.7                   | 2.0                  |
| 24:5n-6    | 5.1                   | 4.1                   | 5.9                | 4.2                | 5.6              | 7.4                        | 6.8                  | 4.1                  | 4.2                 | 3.7                  | 5.2                   | 3.5                  |
| 24:6n-3    | 1.8                   | 2.0                   | 3.0                | 2.8                | 2.0              | 2.2                        | 2.5                  | 3.1                  | 1.1                 | 0.7                  | 1.0                   | 1.1                  |

**Table S26.** The main FA composition (%) of total lipids of the genus *Sarcophyton* [68].

| Fatty acid    | <i>S. buitendijki</i> | <i>S. cinereum</i> | <i>S. aff. crassum</i> | <i>S. buitendijki</i> | <i>S. trocheliophorum</i> | <i>S. acutum</i> | <i>S. elegans</i> |
|---------------|-----------------------|--------------------|------------------------|-----------------------|---------------------------|------------------|-------------------|
| 14:0          | 2.6                   | 3.1                | 3.1                    | 2.1                   | 1.8                       | 2.6              | 2.0               |
| 16:2n-7       | 7.8                   | 12.6               | 11.8                   | 8.3                   | 9.1                       | 6.5              | 6.4               |
| 16:1n-9       | 0.7                   | 0.4                | 0.6                    | 1.3                   | 1.0                       | -                | 0.4               |
| 16:1n-7       | 1.8                   | 2.8                | 2.6                    | 1.3                   | 1.8                       | 2.9              | 1.8               |
| 16:0          | 37.8                  | 37.9               | 40.4                   | 19.2                  | 28.7                      | 19.5             | 31.6              |
| 7-Me-16:1n-10 | 1.9                   | 0.7                | 1.4                    | 1.4                   | 2.2                       | 1.4              | 0.6               |
| 18:3n-6       | -                     | -                  | -                      | -                     | -                         | 1.9              | -                 |
| 18:4n-3       | 4.7                   | 4.8                | 2.4                    | 8.1                   | 6.7                       | 8.9              | 3.7               |
| 18:2n-7       | 1.3                   | 1.5                | 1.5                    | 0.9                   | 1.6                       | 1.0              | 1.5               |

|         |      |      |      |      |      |      |      |
|---------|------|------|------|------|------|------|------|
| 18:2n-6 | -    | 0.1  | 0.3  | 0.3  | 0.3  | 0.5  | 1.3  |
| 18:1n-9 | 1.3  | 1.4  | 1.9  | 2.1  | 1.8  | 1.7  | 2.4  |
| 18:1n-7 | 0.2  | 0.2  | 0.2  | -    | 0.3  | 0.3  | -    |
| 18:0    | 7.5  | 5.2  | 5.6  | 4.9  | 7.1  | 5.7  | 4.6  |
| 19:1    | -    | 0.2  | 0.2  | -    | -    | -    | 3.1  |
| 20:4n-6 | 16.3 | 12.6 | 15.1 | 24.8 | 17.9 | 21.1 | 15.2 |
| 20:5n-3 | 2.2  | 1.5  | 1.0  | 5.2  | 2.2  | 5.0  | 6.2  |
| 20:3n-6 | 0.2  | 0.2  | 0.2  | 0.2  | 0.6  | 0.3  | 1.1  |
| 20:4n-3 | 0.3  | 0.3  | 0.3  | 0.1  | 0.4  | 0.2  | 2.8  |
| 20:1    | 0.2  | 0.3  | 0.2  | 1.2  | 0.2  | 0.3  | -    |
| 20:0    | 0.8  | 0.7  | 0.6  | -    | 0.4  | 0.5  | 1.3  |
| 22:5n-6 | 0.1  | 0.1  | 0.1  | -    | 0.1  | 0.2  | -    |
| 22:6n-3 | 3.1  | 2.5  | 1.3  | 5.5  | 3.8  | 5.1  | 1.5  |
| 22:5n-3 | 0.2  | -    | -    | -    | -    | 0.3  | -    |
| 22:4n-3 | 0.1  | -    | 0.3  | -    | 0.1  | -    | 0.6  |
| 22:0    | 0.3  | 0.3  | 0.3  | -    | 0.1  | 0.4  | 0.4  |
| 24:5n-6 | 4.4  | 4.2  | 4.6  | 8.4  | 5.6  | 8.8  | 4.8  |
| 24:6n-3 | 0.9  | 0.6  | 0.5  | 0.8  | 0.8  | 0.5  | 0.4  |

**Table S27.** The main FA composition (%) of total lipids of the genus *Sarcophyton* [68].

| Fatty acid    | <i>S. crassum</i> | <i>S. ehrenbergi</i> | <i>S. cf. glaucum</i> | <i>S. regulare</i> | <i>S. cinereum</i> | <i>S. spongiosum</i> | <i>Sarcophyton</i> sp. |
|---------------|-------------------|----------------------|-----------------------|--------------------|--------------------|----------------------|------------------------|
| 14:0          | 1.5               | 1.8                  | 2.5                   | 1.7                | 3.4                | 2.1                  | 1.9                    |
| 16:0          | 30.2              | 41.6                 | 21.3                  | 35.4               | 22.9               | 25.2                 | 28.4                   |
| 16:1n-7       | 2.7               | 2.4                  | 3.9                   | 2.6                | 4.5                | 2.2                  | 1.8                    |
| 16:2n-7       | 6.3               | 9.3                  | 16.4                  | 5.9                | 14.0               | 8.0                  | 6.1                    |
| 7-Me-16:1n-10 | 0.8               | 1.4                  | 0.8                   | 1.3                | 1.7                | 1.5                  | 2.1                    |
| 16:4          | 0.1               | 0.5                  | 0.9                   | 0.1                | -                  | 0.2                  | 0.2                    |
| 18:0          | 8.0               | 4.4                  | 1.0                   | 5.3                | 6.0                | 5.2                  | 7.1                    |
| 18:1n-9       | 3.4               | 2.5                  | 1.4                   | 2.8                | 8.5                | 1.6                  | 1.9                    |
| 18:1n-7       | 0.4               | 0.1                  | -                     | 0.2                | 2.4                | 0.1                  | 0.2                    |
| 18:2          | 0.9               | 1.0                  | 0.8                   | 0.5                | 1.0                | 0.8                  | 0.4                    |
| 18:2n-7       | 2.4               | 1.0                  | 1.1                   | 0.7                | 1.0                | 1.6                  | 1.3                    |
| 18:2n-6       | 0.2               | -                    | -                     | 0.2                | 0.3                | 0.2                  | 0.1                    |
| 18:3n-6       | -                 | 0.4                  | 0.2                   | 0.7                | 0.5                | 0.2                  | 0.2                    |
| 18:4n-3       | 2.8               | 3.5                  | 6.4                   | 4.5                | 4.4                | 4.5                  | 4.0                    |
| 20:0          | 1.1               | 0.4                  | 0.2                   | 0.7                | 0.3                | 0.5                  | 0.6                    |
| 20:1          | -                 | -                    | -                     | 0.2                | 1.9                | -                    | -                      |
| 20:3n-6       | 0.7               | -                    | 0.2                   | 0.3                | -                  | 0.2                  | 0.2                    |
| 20:4n-6       | 19.6              | 11.5                 | 19.6                  | 18.0               | 11.1               | 25.2                 | 22.9                   |
| 20:4n-3       | 0.8               | 0.5                  | 0.6                   | 0.5                | 0.2                | 0.3                  | 0.4                    |

|         |     |     |     |     |     |     |     |
|---------|-----|-----|-----|-----|-----|-----|-----|
| 20:5n-3 | 0.9 | 1.0 | 1.7 | 1.2 | 1.4 | 2.4 | 2.1 |
| 22:0    | 0.5 | 0.2 | -   | 0.3 | -   | 0.2 | 0.2 |
| 22:4n-6 | 0.2 | 0.1 | -   | 0.4 | 0.2 | 0.2 | 0.3 |
| 22:5n-6 | 0.1 | 0.4 | 0.4 | 0.2 | 0.5 | 0.1 | 0.2 |
| 22:6n-3 | 1.8 | 1.7 | 4.1 | 2.2 | 2.1 | 3.0 | 2.6 |
| 24:5n-6 | 6.9 | 3.2 | 5.5 | 7.0 | 2.1 | 6.8 | 7.9 |
| 24:6n-3 | 0.8 | 1.2 | 0.6 | 0.7 | 0.6 | 1.0 | 0.9 |

**Table S28.** The main FA composition (%) of total lipids of the genus *Lobophytum*. [68,79].

| FA            | <i>L. pusillum</i> <sup>1</sup> | <i>L. cf. delectum</i> <sup>1</sup> | <i>L. michaelae</i> <sup>2</sup> | <i>L. ransonii</i> <sup>2</sup> | <i>L. batarum</i> <sup>2</sup> | <i>L. crassum</i> <sup>2</sup> | <i>Lobophytum</i> sp. <sup>2</sup> |
|---------------|---------------------------------|-------------------------------------|----------------------------------|---------------------------------|--------------------------------|--------------------------------|------------------------------------|
| 14:0          | 2.0                             | 1.1                                 | 2.3                              | 1.2                             | 4.3                            | 1.8                            | -                                  |
| 16:0          | 29.9                            | 16.8                                | 30.0                             | 24.8                            | 25.0                           | 36.8                           | 29.6                               |
| 16:1n-7       | 2.9                             | 0.9                                 | 2.0                              | 1.4                             | 4.9                            | 2.1                            | 2.8                                |
| 16:2n-7       | 7.0                             | 3.9                                 | 4.9                              | 4.2                             | 0.6                            | 6.5                            | 13.4                               |
| 7-Me-16:1n-10 | 2.0                             | 1.9                                 | 1.8                              | 1.3                             | 4.9                            | 0.9                            | 2.3                                |
| 18:0          | 6.2                             | 6.1                                 | 6.3                              | 5.9                             | 7.6                            | 6.7                            | 3.8                                |
| 18:1n-9       | 2.5                             | 2.0                                 | 1.6                              | 1.8                             | 3.8                            | 2.7                            | 2.4                                |
| 18:1n-7       | 0.4                             | -                                   | 0.5                              | 0.2                             | 2.4                            | 0.2                            | 0.2                                |
| 18:2n-7       | 2.3                             | 2.4                                 | 3.7                              | 1.4                             | -                              | 0.9                            | 2.0                                |
| 18:2n-6       | 0.5                             | 1.6                                 | -                                | 0.2                             | 1.2                            | 0.1                            | 0.3                                |
| 18:3n-6       | -                               | 0.4                                 | 0.1                              | -                               | 0.1                            | -                              | 0.3                                |
| 18:4n-3       | 4.1                             | 0.6                                 | 1.9                              | 3.7                             | 0.4                            | 3.7                            | 4.6                                |
| 20:0          | 1.4                             | 0.7                                 | 0.5                              | 0.7                             | 0.7                            | 1.2                            | 0.2                                |
| 20:1n-9       | 0.7                             | 0.7                                 | 0.1                              | 0.2                             | 0.2                            | 0.2                            | 0.1                                |
| 20:3n-6       | 0.8                             | 0.7                                 | 0.1                              | 0.2                             | 0.2                            | 0.3                            | 0.2                                |
| 20:4n-6       | 18.4                            | 30.4                                | 22.2                             | 24.1                            | 21.6                           | 13.5                           | 16.1                               |
| 20:4n-3       | 0.5                             | -                                   | 0.6                              | 0.7                             | 0.2                            | 0.5                            | 0.9                                |
| 20:5n-3       | 1.3                             | 0.2                                 | 1.0                              | 3.4                             | 2.2                            | 1.3                            | 1.9                                |
| 22:0          | 0.6                             | 0.4                                 | 0.3                              | -                               | 0.1                            | 0.4                            | 0.1                                |
| 22:4n-6       | -                               | -                                   | 0.4                              | -                               | 0.4                            | 0.1                            | -                                  |
| 22:5n-6       | 0.2                             | 0.1                                 | -                                | -                               | 0.4                            | -                              | 0.2                                |
| 22:5n-3       | -                               | 0.4                                 | -                                | -                               | 0.1                            | -                              | -                                  |
| 22:6n-3       | 2.5                             | 0.2                                 | 1.5                              | 2.9                             | 1.3                            | 2.2                            | 2.6                                |
| 24:5n-6       | 7.2                             | 14.9                                | 5.5                              | 7.6                             | 2.3                            | 4.0                            | 4.7                                |
| 24:6n-3       | 0.9                             | 0.4                                 | 1.4                              | 2.1                             | 0.4                            | 0.8                            | 1.2                                |

**Table S29.** The main FA composition (%) of the total lipids of some alcyonarian species with zooxanthellae [68,79].

| Fatty acid | <i>Cladiella laciniosa</i> | <i>Cladiella laciniosa</i> | <i>Cladiella subtilis</i> | <i>Cladiella pachyclados</i> | <i>Lytrophyton</i> sp. | <i>Cespitularia</i> sp. | <i>Clavularia</i> sp. |
|------------|----------------------------|----------------------------|---------------------------|------------------------------|------------------------|-------------------------|-----------------------|
|------------|----------------------------|----------------------------|---------------------------|------------------------------|------------------------|-------------------------|-----------------------|

|               |      |      |      |      |      |      |      |
|---------------|------|------|------|------|------|------|------|
| 14:0          | 4.9  | 7.4  | 7.3  | 5.7  | 1.0  | 6.2  | 2.3  |
| 16:0          | 21.0 | 34.6 | 27.8 | 17.5 | 13.6 | 22.6 | 14.7 |
| 16:1n-7       | 4.3  | 4.0  | 3.4  | 4.1  | 0.5  | 7.4  | 1.6  |
| 16:2n-7       | 0.5  | 0.3  | 0.3  | 0.3  | 0.1  | 1.9  | -    |
| 7-Me-16:1n-10 | 0.3  | 0.2  | 0.3  | 0.2  | 0.5  | 0.2  | 0.3  |
| 18:0          | 4.0  | 8.3  | 7.8  | 12.0 | 6.9  | 3.1  | 2.7  |
| 18:1n-9       | 5.4  | 4.9  | 4.7  | 2.6  | 30.7 | 2.0  | 4.0  |
| 18:1n-7       | 0.4  | 0.4  | 0.2  | 0.2  | 0.2  | 0.1  | 0.3  |
| 18:2n-6       | 2.3  | 2.6  | 1.4  | 1.5  | 0.1  | 1.9  | 6.3  |
| 18:3n-6       | 14.2 | 9.4  | 0.1  | 0.2  | -    | 11.5 | 0.5  |
| 18:4n-3       | 7.4  | 3.7  | 4.5  | 8.3  | 5.7  | 7.4  | 8.3  |
| 20:0          | 0.4  | 0.1  | 0.2  | 0.1  | 0.5  | -    | 0.4  |
| 20:1          | 0.4  | 0.2  | 0.2  | 0.2  | 1.0  | 0.1  | -    |
| 20:3n-6       | 0.3  | 0.3  | 0.2  | 0.3  | -    | 0.2  | -    |
| 20:4n-6       | 12.9 | 9.4  | 10.6 | 18.4 | 15.0 | 15.8 | 21.6 |
| 20:4n-3       | 0.2  | 0.1  | 0.2  | 0.2  | 0.1  | 0.1  | -    |
| 20:5n-3       | 3.6  | 2.1  | 3.6  | 4.3  | 6.7  | 4.4  | 7.5  |
| 22:5n-6       | 0.9  | 0.1  | -    | 0.1  | 0.1  | -    | -    |
| 22:4n-3       | -    | -    | -    | -    | -    | 0.1  | 2.0  |
| 22:5n-3       | -    | -    | -    | 0.1  | -    | -    | 2.6  |
| 22:6n-3       | 6.0  | 5.2  | 5.3  | 5.9  | 7.2  | 6.1  | 10.5 |
| 24:5n-6       | 4.3  | 2.2  | 3.5  | 3.4  | 5.0  | 5.4  | 2.4  |
| 24:6n-3       | 1.3  | 0.9  | 2.1  | 0.5  | 0.6  | 0.5  | 0.4  |
| 24:5n-3       | -    | -    | -    | -    | -    | -    | 2.4  |
| 24:4n-3       | -    | -    | -    | -    | 0.1  | 0.3  | 2.3  |

**Table S30.** The main FA composition (%) of total lipids of *Heliopora coerulea* and other alcyonarians [68].

| Fatty acid    | <i>Heliopora coerulea</i> | <i>Carijoa riisei</i> | <i>Carijoa riisei</i> | <i>Klyxum molle</i> | <i>Lemnalia cf. exilis</i> | <i>Lemnalia cf. peristyla</i> | <i>Nephthea capnelliiformis</i> | <i>Nephthea</i> sp. | <i>Nephthea</i> sp. |
|---------------|---------------------------|-----------------------|-----------------------|---------------------|----------------------------|-------------------------------|---------------------------------|---------------------|---------------------|
| 14:0          | 4.9                       | 1.9                   | 2.7                   | 4.3                 | 1.5                        | 2.4                           | 2.2                             | 2.1                 | 1.3                 |
| 16:0          | 45.5                      | 7.4                   | 20.4                  | 13.6                | 20.3                       | 18.1                          | 16.2                            | 11.1                | 13.6                |
| 16:1n-7       | 2.3                       | 0.7                   | 0.6                   | 5.2                 | 0.9                        | 0.6                           | 0.4                             | 0.5                 | 0.3                 |
| 16:2n-7       | 0.2                       | 0.3                   | -                     | 0.4                 | -                          | -                             | 0.2                             | 1.2                 | -                   |
| 7-Me-16:1n-10 | 0.1                       | 0.3                   | 0.3                   | 0.4                 | 0.2                        | 0.3                           | 0.8                             | 10.8                | 1.9                 |
| 16:4          | -                         | 0.2                   | 0.2                   | 0.4                 | 0.2                        | 0.2                           | 0.3                             | 0.5                 | 0.2                 |
| 18:0          | 6.6                       | 4.7                   | 24.6                  | 6.0                 | 15.8                       | 15.5                          | 7.7                             | 9.3                 | 9.1                 |
| 18:1n-9       | 2.4                       | 4.9                   | 8.2                   | 5.0                 | 4.1                        | 4.2                           | 33.3                            | 26.8                | 32.1                |
| 18:1n-7       | 0.8                       | -                     | 0.2                   | 0.3                 | 0.1                        | 0.1                           | 0.2                             | 0.3                 | 0.3                 |
| 18:2n-6       | 3.2                       | 1.8                   | 1.6                   | 1.7                 | 2.4                        | 1.3                           | -                               | 2.6                 | -                   |
| 18:3n-6       | 1.0                       | 9.4                   | 4.8                   | 10.6                | 7.9                        | 4.4                           | -                               | 0.3                 | -                   |
| 18:4n-3       | 2.7                       | 10.6                  | 4.6                   | 8.7                 | 2.6                        | 5.2                           | 1.0                             | 1.0                 | 0.6                 |
| 20:0          | 0.5                       | 0.2                   | 2.7                   | 0.1                 | 3.2                        | 1.4                           | 0.7                             | 1.2                 | 1.0                 |

|         |      |      |     |      |      |      |      |      |      |
|---------|------|------|-----|------|------|------|------|------|------|
| 20:1n-9 | 0.6  | 0.2  | 0.3 | 0.2  | 0.2  | 0.2  | 0.8  | 1.0  | 1.4  |
| 20:3n-6 | 0.3  | 0.9  | 0.9 | 0.3  | 1.3  | 0.7  | -    | -    | 0.1  |
| 20:4n-6 | 0.6  | 17.7 | 7.4 | 19.7 | 18.0 | 2.4  | 12.5 | 11.4 | 15.2 |
| 20:4n-3 | 0.2  | 1.3  | 0.7 | 0.3  | 0.7  | 1.1  | -    | 0.1  | 0.2  |
| 20:5n-3 | 10.2 | 11.4 | 5.8 | 4.8  | 5.9  | 27.2 | 4.4  | 1.5  | 3.9  |
| 22:0    | 0.1  | -    | 1.0 | -    | 0.8  | 0.5  | -    | 0.2  | 0.2  |
| 22:4n-6 | -    | 0.7  | 0.2 | 0.1  | 0.4  | 0.4  | 0.3  | -    | 0.1  |
| 22:5n-6 | 0.9  | -    | -   | 0.1  | 0.2  | -    | -    | -    | 0.2  |
| 22:5n-3 | 1.8  | -    | 0.1 | -    | -    | 0.3  | -    | -    | 0.2  |
| 22:6n-3 | 9.9  | 7.3  | 3.2 | 6.9  | 3.2  | 4.6  | 9.1  | 5.2  | 7.4  |
| 24:5n-6 | -    | 8.9  | 4.0 | 5.5  | 4.8  | 3.1  | 4.8  | 4.1  | 6.9  |
| 24:6n-3 | 2.0  | 2.1  | 0.8 | 1.2  | 1.6  | 2.4  | 1.0  | 0.6  | 1.4  |

**Table S31.** The main FA composition (%) of total lipids of gorgonians [111].

| FA        | <i>Acabaria<br/>erithraea</i> | <i>Acanthogorgia<br/>isoxia</i> |      |      | <i>Chironephthya<br/>variabilis</i> |      |      | <i>Echinog-<br/>orgia</i> sp. | <i>Ellisella<br/>plexauroides</i> |     |     | <i>Menella praelonga</i> |     |      | <i>Paralemnalia<br/>thyrsoides<sup>a</sup></i> |      | <i>Rumphella<br/>aggregata<sup>a</sup></i> |      |
|-----------|-------------------------------|---------------------------------|------|------|-------------------------------------|------|------|-------------------------------|-----------------------------------|-----|-----|--------------------------|-----|------|------------------------------------------------|------|--------------------------------------------|------|
| 14:0      | 0.8                           | 1.7                             | 1.6  | 1.4  | 2.0                                 | 1.8  | 1.5  | 2.9                           | 1.5                               | 1.0 | 1.5 | 1.2                      | 0.6 | 1.3  | 4.5                                            | 3.5  | 2.0                                        | 1.2  |
| i-15:0    | -                             | -                               | -    | -    | -                                   | 0.1  | -    | -                             | -                                 | -   | -   | -                        | -   | -    | -                                              | -    | -                                          | -    |
| ai-15:0   | -                             | 0.1                             | 0.1  | 0.1  | 0.1                                 | 0.1  | 0.2  | -                             | -                                 | 0.1 | 0.1 | -                        | -   | 0.1  | -                                              | -    | -                                          | -    |
| 15:0      | 0.4                           | 0.7                             | 0.8  | 0.9  | 0.8                                 | 0.5  | 0.9  | 0.9                           | 0.6                               | 0.4 | 0.5 | 0.5                      | 0.2 | 0.8  | 0.2                                            | 0.5  | 0.3                                        | 0.1  |
| 16:2n-7   | -                             | -                               | -    | -    | -                                   | -    | -    | -                             | -                                 | -   | -   | -                        | -   | -    | -                                              | -    | 2.8                                        | 1.6  |
| ai-16:0   | 0.2                           | 0.2                             | 0.2  | 0.2  | 0.1                                 | 0.3  | 0.2  | -                             | 0.2                               | 0.2 | 0.2 | 0.2                      | -   | 0.2  | -                                              | -    | -                                          | -    |
| 16:1n-9   | 0.5                           | 0.4                             | 0.5  | 0.1  | 0.2                                 | 0.3  | 1.6  | 1.0                           | 2.1                               | 0.2 | 0.4 | 0.3                      | -   | 0.1  | -                                              | 1.5  | 0.2                                        | 0.2  |
| 16:1n-7   | 1.1                           | 1.3                             | 1.9  | 3.1  | 2.0                                 | 1.5  | 1.0  | 1.6                           | 0.4                               | 1.1 | 1.7 | 1.5                      | 1.1 | 3.0  | 1.0                                            | 0.7  | 3.0                                        | 2.3  |
| 16:1n-5   | 0.5                           | 0.2                             | -    | 0.8  | 0.3                                 | 0.3  | 0.2  | -                             | -                                 | 0.3 | 0.3 | 0.3                      | -   | 0.6  | 0.1                                            | -    | -                                          | 0.2  |
| 16:0      | 7.5                           | 10.9                            | 10.1 | 14.6 | 10.6                                | 12.2 | 10.4 | 14.0                          | 9.9                               | 7.6 | 9.2 | 9.0                      | 2.4 | 15.1 | 27.8                                           | 19.6 | 33.4                                       | 32.5 |
| 7-Me-16:1 | 1.4                           | 1.6                             | 2.6  | 1.7  | 6.7                                 | 1.8  | 1.7  | 2.9                           | 3.3                               | 2.2 | 2.1 | 2.9                      | 1.7 | 1.7  | 0.2                                            | 0.2  | 2.3                                        | 3.1  |
| i-17:0    | 0.1                           | 0.3                             | 0.6  | 0.7  | 0.7                                 | 0.5  | 0.5  | 0.5                           | 1.0                               | 0.7 | 0.5 | 0.8                      | -   | 0.8  | 0.2                                            | -    | -                                          | -    |
| 2-Me-16:0 | 0.1                           | 0.2                             | -    | 0.1  | -                                   | 0.1  | -    | -                             | -                                 | -   | -   | -                        | -   | 0.2  | -                                              | 0.1  | 0.5                                        | 0.3  |
| ai-17:0   | 0.2                           | 0.2                             | 0.1  | 0.2  | -                                   | 0.2  | 0.2  | -                             | 0.3                               | 0.2 | 0.2 | 0.3                      | -   | 0.3  | -                                              | -    | -                                          | -    |
| 17:0      | 0.6                           | 0.9                             | 0.7  | 1.8  | 0.7                                 | 0.8  | 1.0  | 0.9                           | 1.2                               | 1.5 | 1.3 | 1.1                      | -   | 2.0  | 0.3                                            | 0.3  | 0.1                                        | 0.1  |
| 18:3n-6   | -                             | 0.1                             | 0.1  | 0.1  | -                                   | -    | -    | -                             | -                                 | -   | -   | -                        | -   | 0.1  | 8.7                                            | 8.7  | 1.4                                        | 0.8  |
| 18:4n-3   | 0.4                           | 0.1                             | 0.1  | 0.3  | -                                   | 0.1  | -    | -                             | 0.1                               | 0.2 | 0.1 | 0.1                      | 0.5 | 0.2  | 1.8                                            | 3.9  | 3.0                                        | 1.3  |
| br-18:0   | 0.3                           | 0.1                             | 0.1  | 0.1  | -                                   | 0.2  | 0.2  | -                             | 0.2                               | 0.2 | 0.3 | 0.3                      | -   | 0.2  | -                                              | -    | -                                          | -    |
| 18:2n-9   | -                             | -                               | -    | -    | -                                   | -    | 0.2  | -                             | -                                 | -   | -   | -                        | -   | -    | 0.3                                            | 0.3  | 0.5                                        | 0.5  |
| 18:2n-7   | -                             | -                               | -    | -    | -                                   | -    | -    | -                             | -                                 | -   | -   | -                        | -   | -    | -                                              | -    | 2.6                                        | 1.9  |
| 18:2n-6   | 0.9                           | 0.9                             | 0.8  | 1.4  | 0.7                                 | 2.4  | 1.0  | 0.7                           | 0.6                               | 0.9 | 1.2 | 0.8                      | 0.3 | 1.4  | 1.7                                            | 1.4  | 0.8                                        | 0.5  |
| 18:1n-9   | 2.4                           | 3.9                             | 2.2  | 3.7  | 2.4                                 | 6.7  | 3.0  | 3.1                           | 2.4                               | 2.5 | 3.1 | 2.0                      | 0.5 | 3.9  | 3.6                                            | 3.1  | 3.5                                        | 4.2  |
| 18:1n-7   | 1.9                           | 1.1                             | 1.5  | 3.8  | 1.8                                 | 1.8  | 1.3  | 2.2                           | 1.8                               | 2.5 | 3.3 | 1.2                      | 0.5 | 4.1  | 0.2                                            | 0.1  | 0.4                                        | 0.3  |
| 18:0      | 6.5                           | 6.3                             | 4.5  | 7.7  | 5.3                                 | 5.7  | 6.4  | 5.3                           | 5.1                               | 8.8 | 8.3 | 6.1                      | 0.9 | 8.9  | 12.4                                           | 8.6  | 8.2                                        | 11.0 |
| ai-19:0   | 0.1                           | -                               | -    | -    | -                                   | 0.1  | -    | -                             | -                                 | 0.1 | -   | 0.1                      | -   | 0.1  | -                                              | -    | -                                          | -    |

|            |      |      |      |      |      |      |      |      |      |      |      |      |      |      |      |      |      |      |
|------------|------|------|------|------|------|------|------|------|------|------|------|------|------|------|------|------|------|------|
| Me-F18     | 2.7  | -    | -    | -    | 0.5  | -    | -    | -    | 0.5  | 0.1  | -    | 0.3  | 1.0  | -    | -    | -    | -    | -    |
| 19:0       | 0.3  | 0.3  | 0.3  | 0.5  | -    | 0.3  | 0.3  | -    | 0.2  | 0.5  | 0.4  | 0.4  | -    | 0.6  | 0.1  | 0.1  | -    | 0.1  |
| 20:4n-6    | 37.2 | 43.7 | 48.2 | 24.4 | 34.9 | 40.2 | 46.2 | 47.6 | 42.3 | 37.3 | 38.3 | 40.6 | 57.0 | 21.5 | 22.4 | 28.7 | 13.8 | 12.5 |
| 20:5n-3    | 1.7  | 4.9  | 3.5  | 1.4  | 2.5  | 2.0  | 1.2  | 2.2  | 2.6  | 1.3  | 2.0  | 2.7  | 7.4  | 0.9  | 1.9  | 3.6  | 2.6  | 1.5  |
| 20:3n-6    | 0.4  | 0.4  | -    | 1.4  | -    | 0.3  | 0.3  | 0.2  | 0.2  | 0.5  | 0.3  | -    | -    | 1.4  | 0.4  | 0.5  | 1.6  | 1.1  |
| 20:4n-3    | 0.3  | 0.2  | 0.1  | 0.5  | -    | 0.2  | -    | 0.2  | -    | 0.3  | 0.5  | 0.1  | 0.3  | 0.4  | -    | 0.1  | 0.7  | 0.5  |
| 20:2n-6    | 0.4  | -    | -    | 0.5  | -    | 0.1  | -    | -    | -    | 0.2  | 0.2  | -    | -    | 0.6  | -    | -    | -    | 0.1  |
| 20:1n-9    | 0.4  | 0.4  | 1.0  | 1.3  | 0.6  | 0.3  | 0.6  | -    | -    | 0.6  | 0.5  | 0.3  | -    | 1.6  | 0.2  | -    | 0.4  | 0.4  |
| 20:1n-7    | 0.2  | -    | 0.5  | 0.5  | -    | 0.2  | 0.3  | -    | -    | 0.4  | 0.7  | -    | -    | 0.6  | -    | -    | -    | 0.1  |
| diMe-F18-3 | -    | -    | -    | -    | 0.7  | -    | -    | -    | 0.8  | -    | -    | 0.4  | -    | -    | -    | -    | -    | -    |
| 20:0       | 0.3  | 0.3  | 0.6  | 0.7  | 0.3  | 0.3  | 0.4  | -    | 0.3  | 0.6  | 0.3  | 0.4  | -    | 0.8  | 0.9  | 0.7  | 5.3  | 8.1  |
| Me-F20     | -    | -    | -    | -    | 0.9  | 0.3  | 0.3  | -    | 0.4  | 1.0  | -    | 0.5  | 0.6  | -    | -    | -    | -    | -    |
| 21:0       | -    | -    | 0.1  | 0.3  | -    | 0.1  | -    | -    | 0.1  | 0.3  | -    | 0.2  | 0.1  | 0.4  | 0.1  | 0.1  | 0.2  | 0.3  |
| 22:5n-6    | 5.7  | 0.4  | 0.2  | 2.8  | 0.5  | 0.8  | 0.8  | 0.2  | 0.3  | 1.2  | 1.2  | 0.4  | 0.4  | 3.0  | -    | -    | 0.1  | 0.1  |
| 22:6n-3    | 3.9  | 1.6  | 0.8  | 5.2  | 1.5  | 1.4  | 1.2  | 0.8  | 1.6  | 3.2  | 3.9  | 1.3  | 1.8  | 4.7  | 2.3  | 2.6  | 1.8  | 1.4  |
| 22:4n-6    | 0.6  | 0.5  | 0.4  | 10.6 | 0.4  | 0.3  | 1.4  | 0.4  | 0.4  | 14.7 | 11.8 | 0.5  | 0.7  | 10.6 | 0.1  | 0.2  | 0.7  | 0.6  |
| 22:5n-3    | 0.3  | 0.2  | 0.1  | -    | -    | 0.1  | 0.1  | -    | 0.1  | 0.5  | 0.7  | 0.1  | -    | 0.6  | -    | -    | -    | -    |
| 22:3n-6    | -    | -    | -    | 0.5  | -    | -    | -    | -    | -    | -    | -    | -    | -    | 0.5  | -    | -    | 0.1  | 0.1  |
| diMe-F20   | -    | -    | -    | -    | 0.8  | 0.2  | 0.2  | -    | 0.5  | 0.6  | 0.2  | 0.5  | 0.6  | -    | -    | -    | -    | -    |
| diMe-F20-3 | -    | -    | -    | -    | 0.8  | -    | -    | -    | 1.1  | -    | -    | 0.3  | -    | -    | -    | -    | -    | -    |
| 22:2n-6    | -    | 0.2  | -    | -    | -    | -    | -    | -    | -    | -    | -    | -    | 0.3  | 0.2  | -    | -    | 0.3  | 0.5  |
| 22:1n-9    | 0.2  | 0.1  | -    | 0.4  | -    | 0.1  | -    | -    | -    | 0.4  | 0.5  | 0.2  | -    | 0.6  | 0.1  | -    | 0.3  | 0.5  |
| 22:1n-7    | -    | -    | -    | 0.2  | -    | -    | 0.3  | -    | -    | 0.2  | -    | -    | -    | 0.3  | -    | -    | 0.1  | 0.1  |
| 22:0       | -    | -    | 1.6  | 0.3  | -    | -    | -    | -    | -    | 0.2  | 0.2  | 0.1  | -    | 0.4  | 0.3  | 0.3  | 3.3  | 4.4  |
| Me-F22     | 0.1  | -    | -    | -    | 1.7  | 0.2  | 0.2  | -    | 1.6  | 0.9  | 0.3  | 2.0  | 0.5  | -    | -    | -    | -    | -    |
| 24:5n-6    | 14.5 | 11.2 | 10.7 | 0.6  | 12.4 | 12.6 | 12.0 | 8.9  | 8.9  | 0.2  | 0.2  | 13.3 | 13.5 | 0.6  | 6.5  | 8.3  | 3.2  | 3.6  |
| 24:6n-3    | 2.3  | 3.0  | 2.4  | 1.8  | 1.6  | 1.2  | 1.1  | 2.6  | 1.3  | 1.6  | 1.3  | 2.4  | 4.8  | 1.6  | 0.6  | 1.0  | 0.2  | 0.2  |
| diMe-F22   | 0.3  | -    | -    | -    | 5.1  | 0.2  | 0.3  | -    | 4.9  | 0.5  | 0.1  | 3.7  | 1.2  | -    | -    | -    | -    | -    |
| 24:1n-9    | -    | -    | -    | 0.2  | -    | -    | -    | -    | -    | 0.3  | -    | -    | -    | 0.3  | -    | -    | 0.1  | 0.1  |
| 24:1n-7    | 0.6  | -    | -    | -    | -    | -    | -    | -    | -    | -    | -    | -    | -    | 0.1  | -    | -    | -    | -    |
| 24:0       | -    | 0.3  | -    | 0.2  | -    | 0.1  | -    | -    | -    | -    | -    | -    | -    | 0.2  | -    | -    | 0.1  | 0.2  |

*Me-F18* 10,13-epoxy-11-methyloctadeca-10,12-dienoic acid, *Me-F20* 12,15-epoxy-13-methyleicosa-12,14-dienoic acid, *diMe-F20* 12,15-epoxy-13,14-dimethyleicosa-12,14-dienoic acid, *Me-F22* 14,17-epoxy-15-methylidocosa-14,16-dienoic acid, *diMe-F22* 14,17-epoxy-15,16-dimethyldocosa-14,16-dienoic acid, *diMe-F18-3* 12,15-epoxy-13,14-dimethyloctadeca-12,14-dienoic acid, *diMe-F20-3* 14,17-epoxy-15,16-dimethyleicosa-14,16-dienoic acid. \* Species with zooxanthellae.

**Table S32.** The main FA composition (%) of total lipids of the gorgonian *Bebryce studeri* [111].

| Fatty acid | Content | Fatty acid | Content  | Fatty acid  | Content |
|------------|---------|------------|----------|-------------|---------|
| 14:0       | 1.7±0.7 | 18:0       | 5.4±1.1  | 24:5n-6     | 7.2±2.5 |
| i-15:0     | 1.8±0.2 | ai-19:0    | 0.2±0.0  | 24:6n-3     | 0.5±0.2 |
| ai-15:0    | 0.2±0.1 | 19:0       | 0.5±0.1  | Furan acids |         |
| 15:0       | 0.5±0.3 | 20:4n-6    | 21.7±7.2 | Me-F18      | 0.2±0.1 |
| ai-16:0    | 0.4±0.2 | 20:5n-3    | 2.0±0.9  | Me-F20      | 0.5±0.3 |
| 16:1n-9    | 0.3±0.1 | 20:3n-6    | 0.3±0.1  | diMe-F20    | 0.2±0.1 |

|               |         |         |         |                |          |
|---------------|---------|---------|---------|----------------|----------|
| 16:1n-7       | 1.9±0.8 | 20:4n-3 | 0.1±0.1 | Me-F22         | 0.9±0.6  |
| 16:1n-5       | 0.3±0.1 | 20:1n-9 | 0.4±0.1 | diMe-F22       | 0.9±0.9  |
| 16:0          | 8.9±2.7 | 20:1n-7 | 0.3±0.1 | Sponge markers |          |
| 7-Me-16:1n-10 | 2.3±0.6 | 20:0    | 2.3±1.4 | 24:1n-9        | 0.3±0.1  |
| i-17:0        | 1.3±0.7 | 21:0    | 0.5±0.2 | 24:1n-7        | 0.6±0.4  |
| ai-17:0       | 0.6±0.2 | 22:5n-6 | 4.2±2.3 | 24:0           | 0.6±0.4  |
| 17:0          | 0.8±0.2 | 22:6n-3 | 3.5±1.8 | 25:2(5,9)      | 0.8±0.1  |
| 18:4n-3       | 0.3±0.3 | 22:4n-6 | 1.1±0.5 | 26:3(5,9,19)   | 0.8±0.5  |
| br-18:0       | 0.2±0.1 | 22:5n-3 | 0.5±0.3 | 26:2(5,9)      | 12.9±2.8 |
| 18:2n-6       | 0.7±0.1 | 22:1n-9 | 0.3±0.1 | 26:2           | 0.7±0.4  |
| 18:1n-9       | 1.8±0.5 | 22:1n-7 | 0.2±0.0 | 26:1           | 1.3±0.4  |
| 18:1n-7       | 2.1±0.4 | 22:0    | 0.9±0.5 | 28:3(5,9,19)   | 2.7±0.9  |

**Table S33.** The main FA composition (%) of total lipids of gorgonians.\* species with zooxanthellae [68].

| Fatty acid | <i>Siphonogorgia variabilis</i> | <i>Siphonogorgia</i> cf. <i>harrisoni</i> | <i>Siphonogorgia</i> cf. <i>harrisoni</i> | <i>Annella mollis</i> | <i>Annella mollis</i> | <i>Mopsella</i> sp. | <i>Mopsella</i> cf. <i>spinosa</i> | <i>Parisis</i> cf. <i>minor</i> | <i>Menella</i> cf. <i>praelonga</i> | <i>Menella</i> cf. <i>praelonga</i> | <i>Menella flora</i> |
|------------|---------------------------------|-------------------------------------------|-------------------------------------------|-----------------------|-----------------------|---------------------|------------------------------------|---------------------------------|-------------------------------------|-------------------------------------|----------------------|
| 14:0       | 1.9                             | 2.2                                       | 2.2                                       | 2.2                   | 1.9                   | 1.6                 | 1.6                                | 1.4                             | 1.6                                 | 1.2                                 | 2.2                  |
| 16:0       | 13.1                            | 21.3                                      | 14.5                                      | 13.2                  | 11.8                  | 11.0                | 9.8                                | 13.2                            | 9.8                                 | 8.3                                 | 12.3                 |
| 16:1n-7    | 2.1                             | 3.0                                       | 2.1                                       | 1.8                   | 1.7                   | 1.3                 | 1.7                                | 1.7                             | 1.3                                 | 1.9                                 | 2.2                  |
| 16:2n-7    | 0.3                             | -                                         | -                                         | 0.3                   | 0.4                   | 0.8                 | 0.6                                | 0.5                             | 0.6                                 | 1.0                                 | 0.4                  |
| 7-Me-16:1  | 4.3                             | 9.5                                       | 6.1                                       | 5.5                   | 5.6                   | 0.9                 | 1.2                                | 2.4                             | 1.6                                 | 2.0                                 | 1.9                  |
| 16:4       | -                               | -                                         | -                                         | 0.2                   | 0.2                   | 3.6                 | 0.8                                | 2.1                             | 1.5                                 | 1.7                                 | 1.8                  |
| 18:0       | 6.3                             | 10.0                                      | 8.5                                       | 6.8                   | 5.6                   | 7.8                 | 6.6                                | 9.0                             | 3.9                                 | 3.9                                 | 4.8                  |
| 18:1n-9    | 3.4                             | 5.3                                       | 4.2                                       | 2.6                   | 2.5                   | 2.9                 | 2.8                                | 3.6                             | 3.1                                 | 3.3                                 | 2.9                  |
| 18:1n-7    | 2.2                             | 1.6                                       | 2.3                                       | 2.1                   | 2.1                   | 1.0                 | 1.4                                | 2.2                             | 1.2                                 | 2.5                                 | 2.0                  |
| 18:2n-7    | -                               | 1.6                                       | 1.4                                       | -                     | -                     | -                   | 0.3                                | -                               | -                                   | -                                   | -                    |
| 18:2n-6    | 0.9                             | -                                         | -                                         | 1.0                   | 0.9                   | 0.7                 | 1.0                                | 0.8                             | 1.1                                 | 1.2                                 | 0.9                  |
| 18:3n-6    | 1.0                             | 0.6                                       | 0.2                                       | 0.3                   | 0.3                   | 0.2                 | 0.7                                | 0.4                             | 0.3                                 | 0.5                                 | 0.4                  |
| 18:4n-3    | -                               | 0.8                                       | 0.4                                       | 0.5                   | 0.8                   | 0.6                 | 1.1                                | 0.7                             | 0.2                                 | 0.5                                 | 0.5                  |
| 20:0       | 0.9                             | 1.2                                       | 0.9                                       | 0.5                   | 0.5                   | 0.2                 | 0.3                                | 1.1                             | 0.6                                 | 0.7                                 | 0.6                  |
| 20:1n-9    | 1.9                             | 0.4                                       | 0.4                                       | 0.2                   | 0.2                   | 0.5                 | 0.2                                | 0.5                             | 0.3                                 | 0.3                                 | 0.3                  |
| 20:3n-6    | 0.8                             | 0.3                                       | 0.5                                       | 1.0                   | 1.0                   | 0.6                 | 0.6                                | 0.7                             | 0.3                                 | 0.8                                 | 0.5                  |
| 20:4n-6    | 34.8                            | 21.8                                      | 27.1                                      | 19.2                  | 19.3                  | 32.4                | 28.0                               | 22.3                            | 41.2                                | 34.3                                | 36.7                 |
| 20:4n-3    | -                               | -                                         | 0.4                                       | 1.5                   | 1.3                   | 0.3                 | 0.6                                | 0.4                             | -                                   | 0.7                                 | -                    |
| 20:5n-3    | 2.1                             | 1.6                                       | 1.5                                       | 2.1                   | 2.8                   | 1.6                 | 3.8                                | 4.9                             | 2.7                                 | 2.4                                 | 4.6                  |
| 22:0       | -                               | 0.4                                       | 0.4                                       | 0.4                   | 0.3                   | -                   | 0.1                                | 0.3                             | -                                   | 1.3                                 | -                    |
| 22:4n-6    | -                               | 0.6                                       | 0.5                                       | 2.9                   | 2.5                   | 0.7                 | 0.9                                | 1.0                             | 0.8                                 | 1.2                                 | 1.1                  |
| 22:5n-6    | 0.8                             | 0.4                                       | 0.9                                       | 3.2                   | 3.0                   | 1.5                 | 1.5                                | 4.4                             | 0.4                                 | 0.6                                 | -                    |
| 22:4n-3    | -                               | -                                         | -                                         | 0.2                   | 0.2                   | -                   | 0.3                                | -                               | -                                   | -                                   | -                    |
| 22:5n-3    | 0.9                             | 0.7                                       | 0.2                                       | 0.2                   | 0.3                   | -                   | 0.5                                | -                               | 0.7                                 | 1.1                                 | 0.7                  |



|         |      |     |      |      |      |      |      |     |      |      |      |
|---------|------|-----|------|------|------|------|------|-----|------|------|------|
| 22:6n-3 | 1.6  | 1.4 | 1.7  | 7.1  | 7.7  | 1.9  | 4.1  | 5.1 | 1.5  | 2.2  | 3.0  |
| 24:5n-6 | 11.9 | 6.4 | 13.1 | 10.6 | 11.3 | 15.4 | 13.0 | 5.8 | 14.3 | 13.1 | 11.3 |
| 24:6n-3 | 1.7  | 0.6 | 3.4  | 2.8  | 4.4  | 2.6  | 6.8  | 5.5 | 2.1  | 4.4  | 2.8  |

**Table S33.** (continued).

| Fatty acid    | <i>Echinogorgia</i> cf.<br><i>gracillima</i> | <i>Paracis</i> cf.<br><i>horrida</i> | <i>Hicksonella</i><br><i>princeps</i> * | <i>Hicksonella</i><br><i>princeps</i> * | <i>Viminella</i><br>cf. <i>petila</i> | <i>Viminella</i><br>cf. <i>crassa</i> | <i>Narella</i><br>sp. | Plexauridae<br>spp. 1 | Plexauridae<br>spp. 2 |
|---------------|----------------------------------------------|--------------------------------------|-----------------------------------------|-----------------------------------------|---------------------------------------|---------------------------------------|-----------------------|-----------------------|-----------------------|
| 14:0          | 1.9                                          | 1.1                                  | 2.5                                     | 1.9                                     | 1.3                                   | 1.6                                   | 1.9                   | 1.3                   | 1.4                   |
| 16:0          | 10.7                                         | 7.8                                  | 29.8                                    | 35.8                                    | 6.1                                   | 8.1                                   | 14.6                  | 9.6                   | 9.5                   |
| 16:1n-7       | 1.9                                          | 2.1                                  | 3.1                                     | 2.5                                     | 2.1                                   | 2.1                                   | 1.9                   | 1.9                   | 1.3                   |
| 16:2n-7       | 0.4                                          | -                                    | 0.3                                     | 0.1                                     | 0.2                                   | 0.2                                   | -                     | 0.3                   | 0.8                   |
| 7-Me-16:1n-10 | 2.1                                          | 3.6                                  | 1.7                                     | 1.6                                     | 2.2                                   | 2.0                                   | 1.2                   | 2.5                   | 1.8                   |
| 16:4          | 1.6                                          | -                                    | 0.3                                     | 0.2                                     | 1.0                                   | 0.6                                   | -                     | 0.3                   | 0.6                   |
| 18:0          | 5.3                                          | 4.4                                  | 4.6                                     | 5.8                                     | 5.5                                   | 5.8                                   | 5.9                   | 5.3                   | 5.7                   |
| 18:1n-9       | 2.4                                          | 5.3                                  | 3.5                                     | 4.2                                     | 3.5                                   | 3.7                                   | 6.4                   | 3.8                   | 3.4                   |
| 18:1n-7       | 1.5                                          | 3.2                                  | 0.2                                     | 0.1                                     | 3.1                                   | 2.7                                   | 1.6                   | 1.6                   | 1.4                   |
| 18:2n-6       | 0.8                                          | -                                    | 3.0                                     | 2.9                                     | 1.6                                   | 1.5                                   | 2.1                   | 0.4                   | 0.5                   |
| 18:3n-3       | 0.5                                          | -                                    | 0.3                                     | 0.2                                     | 1.4                                   | 1.2                                   | 0.4                   | 0.1                   | 0.2                   |
| 18:4n-3       | 0.7                                          | 0.2                                  | 3.3                                     | 1.6                                     | 1.8                                   | 1.4                                   | 0.2                   | 0.2                   | 0.2                   |
| 20:0          | 0.4                                          | 0.4                                  | 4.1                                     | 7.1                                     | 1.4                                   | 0.5                                   | 0.4                   | 0.8                   | 0.5                   |
| 20:1n-9       | 0.2                                          | 0.7                                  | 0.4                                     | 0.4                                     | 1.1                                   | 0.7                                   | 1.9                   | 1.0                   | 0.5                   |
| 20:3n-6       | 0.4                                          | 0.5                                  | 0.3                                     | 0.5                                     | 1.5                                   | 0.8                                   | -                     | 0.3                   | 0.2                   |
| 20:4n-6       | 37.6                                         | 34.2                                 | 17.8                                    | 12.5                                    | 16.5                                  | 25.6                                  | 11.6                  | 24.3                  | 34.3                  |
| 20:4n-3       | 0.3                                          | 0.4                                  | 0.1                                     | -                                       | 2.1                                   | 1.2                                   | -                     | 0.3                   | 0.1                   |
| 20:5n-3       | 3.6                                          | 2.3                                  | 5.2                                     | 3.2                                     | 2.5                                   | 3.0                                   | 15.9                  | 6.8                   | 3.5                   |
| 22:0          | -                                            | 0.2                                  | 2.3                                     | 4.9                                     | 0.6                                   | 0.2                                   | -                     | 0.3                   | 0.2                   |
| 22:4n-6       | 0.8                                          | 0.9                                  | 1.3                                     | 1.1                                     | 9.1                                   | 9.2                                   | 0.7                   | 2.9                   | 0.9                   |
| 22:5n-6       | 0.5                                          | 2.3                                  | 0.4                                     | 0.7                                     | 5.0                                   | 3.1                                   | 1.9                   | 2.2                   | 2.1                   |
| 22:4n-3       | -                                            | -                                    | -                                       | -                                       | 1.9                                   | 0.5                                   | -                     | -                     | -                     |
| 22:5n-3       | 0.5                                          | 0.7                                  | 0.3                                     | -                                       | 1.9                                   | 1.4                                   | 0.9                   | 1.5                   | 0.6                   |
| 22:6n-3       | 3.6                                          | 5.3                                  | 5.5                                     | 6.1                                     | 5.8                                   | 6.8                                   | 8.6                   | 10.7                  | 5.5                   |
| 24:5n-6       | 12.0                                         | 13.4                                 | 2.0                                     | 2.4                                     | 1.7                                   | 0.5                                   | -                     | 8.8                   | 13.5                  |
| 24:6n-3       | 2.8                                          | 3.4                                  | 0.2                                     | 0.3                                     | 7.6                                   | 4.6                                   | 12.4                  | 1.1                   | 1.4                   |

**Table S34.** The FA composition (%) of polar and neutral lipids of the hard coral *Stylopora pistillata* (Seychelles) at different depths [100].

| Fatty acid | Polar lipids |     |     |     | Neutral lipids |      |      |      |
|------------|--------------|-----|-----|-----|----------------|------|------|------|
|            | Depth, m     |     |     |     |                |      |      |      |
|            | 3            | 9   | 35  | 25  | 3              | 9    | 35   | 25   |
| 14:0       | 0.8          | 1.2 | 0.8 | 0.7 | 3.6            | 2.8  | 0.8  | 1.0  |
| 16:0       | 4.2          | 4.2 | 4.3 | 5.8 | 36.9           | 24.1 | 23.7 | 21.5 |

|         |      |      |      |      |      |      |      |      |
|---------|------|------|------|------|------|------|------|------|
| 16:1n-7 | 1.0  | 1.5  | 0.3  | 1.7  | 3.4  | 4.3  | 1.6  | 1.0  |
| 16:2    | -    | 0.4  | 0.4  | 0.5  | 0.2  | 0.8  | 0.5  | 0.3  |
| 18:0    | 5.6  | 11.1 | 8.6  | 9.8  | 9.7  | 7.1  | 5.6  | 5.3  |
| 18:1n-9 | 0.8  | 1.5  | 2.4  | 2.3  | 4.3  | 11.2 | 17.7 | 16.5 |
| 18:2n-6 | 0.5  | 0.7  | 1.0  | 1.1  | 1.1  | 1.1  | 2.8  | 3.4  |
| 18:3n-6 | 0.9  | 1.1  | 8.1  | 7.7  | 2.4  | 1.2  | 0.8  | 0.8  |
| 18:4n-3 | 4.9  | 8.6  | 10.9 | 14.5 | 0.7  | 0.5  | 0.4  | 0.4  |
| 20:0    | 0.3  | 0.4  | 1.0  | 1.3  | 0.8  | 0.9  | 0.4  | 0.4  |
| 20:1    | -    | 0.4  | 0.4  | 0.5  | 0.5  | 0.8  | 1.8  | 1.6  |
| 20:2n-6 | 3.7  | 1.9  | 0.9  | 1.3  | 0.5  | 0.6  | 1.2  | 1.4  |
| 20:3n-6 | 1.6  | 0.5  | -    | 1.8  | 7.9  | 8.2  | 5.2  | 4.7  |
| 20:4n-6 | 25.3 | 19.0 | 25.0 | 17.0 | 2.0  | 1.8  | 1.1  | 1.4  |
| 20:4n-3 | 0.3  | -    | -    | -    | 0.7  | 0.7  | 0.6  | 0.6  |
| 20:5n-3 | 23.8 | 19.9 | 11.8 | 12.0 | 3.3  | 0.7  | 0.5  | 0.5  |
| 22:3n-6 | -    | -    | -    | -    | 0.6  | 0.9  | 0.6  | 0.8  |
| 22:4n-6 | 9.4  | 10.5 | 8.4  | 8.4  | 0.6  | 0.7  | 1.0  | 1.1  |
| 22:5n-6 | -    | -    | -    | -    | -    | -    | -    | -    |
| 22:5n-3 | 2.6  | 3.6  | 1.6  | 1.9  | 1.9  | 1.7  | 1.8  | 2.0  |
| 22:6n-3 | 9.0  | 6.6  | 8.4  | 7.5  | 18.2 | 22.9 | 31.1 | 35.1 |

**Table S35.** The FA composition (%) of polar lipids of cnidarians, Okinawa Is., Japan [36].

| Fatty acid | <i>Pocillopora damicornis</i> | <i>Pocillopora verrucosa</i> | <i>Stylophora pistillata</i> | <i>Montipora aequituberculata</i> | <i>Acropora microphthalma</i> | <i>Porites lutea</i> | <i>Porites cylindrica</i> | <i>Fungia fungites</i> | <i>Galaxea fascicularis</i> | <i>Goniastrea aspera</i> | <i>Oulastrea crispata</i> | <i>Tubastrea</i> sp. | <i>Lobophytum crassum</i> |
|------------|-------------------------------|------------------------------|------------------------------|-----------------------------------|-------------------------------|----------------------|---------------------------|------------------------|-----------------------------|--------------------------|---------------------------|----------------------|---------------------------|
| 14:0       | 3.7                           | 3.6                          | 5.4                          | 1.6                               | 1.3                           | 0.9                  | 1.0                       | 1.4                    | 2.7                         | 1.5                      | 2.8                       | 0.5                  | 1.8                       |
| 16:0       | 48.2                          | 49.1                         | 45.2                         | 38.7                              | 36.5                          | 19.2                 | 15.8                      | 43.5                   | 54.8                        | 51.9                     | 32.2                      | 19.5                 | 30.9                      |
| 16:1n-7    | 3.0                           | 1.7                          | 3.3                          | 2.7                               | 2.3                           | 1.2                  | 0.4                       | 1.4                    | 3.9                         | 1.3                      | 1.6                       | 0.5                  | 2.6                       |
| 2-OH-16:0  | 0.9                           | 1.1                          | 0.7                          | 1.5                               | 0.8                           | 1.1                  | 0.6                       | 1.4                    | 0.5                         | 0.0                      | 1.0                       | 0.6                  | 0.6                       |
| 18:0       | 9.3                           | 9.1                          | 6.7                          | 6.1                               | 13.4                          | 5.5                  | 4.4                       | 14.6                   | 7.5                         | 11.6                     | 20.3                      | 16.4                 | 12.3                      |
| 18:1n-9    | 6.6                           | 3.8                          | 6.2                          | 4.2                               | 2.8                           | 5.6                  | 4.3                       | 5.7                    | 5.7                         | 4.5                      | 5.9                       | 2.8                  | 2.1                       |
| 18:2n-6    | 1.9                           | 0.9                          | 0.4                          | 1.2                               | 1.3                           | 1.2                  | 3.4                       | 1.1                    | 1.2                         | 0.8                      | 1.0                       | 1.6                  | 6.1                       |
| 18:3n-6    | 2.4                           | 0.7                          | 1.5                          | 8.2                               | 8.3                           | 14.5                 | 6.2                       | 7.7                    | 4.7                         | 2.0                      | 2.1                       | 0.3                  | 15.9                      |
| 18:4n-3    | 3.7                           | 0.9                          | 10.2                         | 5.8                               | 3.1                           | 8.2                  | 15.2                      | 1.1                    | 1.1                         | 0.9                      | 7.0                       | 0.2                  | 0.0                       |
| 20:0       | 3.9                           | 2.3                          | 0.9                          | 0.6                               | 1.4                           | 0.5                  | 0.5                       | 2.8                    | 2.1                         | 1.5                      | 1.8                       | 1.2                  | 0.8                       |
| 20:1       | 0.0                           | 0.0                          | 1.6                          | 0.3                               | 2.9                           | 0.7                  | 0.4                       | 1.4                    | 0.3                         | 0.5                      | 1.6                       | 1.0                  | 0.0                       |
| 20:2       | 0.0                           | 0.0                          | 0.3                          | 0.3                               | 0.5                           | 0.8                  | 0.7                       | 0.1                    | 0.4                         | 0.3                      | 0.5                       | 1.0                  | 0.0                       |
| 20:3n-6    | 1.6                           | 1.0                          | 1.2                          | 0.4                               | 1.1                           | 1.0                  | 0.3                       | 1.3                    | 1.6                         | 0.3                      | 1.2                       | 1.7                  | 1.0                       |

|         |     |     |     |     |     |      |      |     |     |     |     |      |      |
|---------|-----|-----|-----|-----|-----|------|------|-----|-----|-----|-----|------|------|
| 20:4n-6 | 0.0 | 0.0 | 0.5 | 3.4 | 7.2 | 15.6 | 14.1 | 4.5 | 2.1 | 2.5 | 4.8 | 14.0 | 20.4 |
| 20:5n-3 | 0.0 | 0.0 | 4.7 | 1.3 | 8.9 | 5.6  | 4.3  | 0.8 | 0.2 | 0.0 | 2.8 | 9.5  | 4.2  |
| 22:0    | 1.0 | 1.1 | 0.7 | 0.3 | 0.3 | 0.5  | 0.2  | 0.9 | 1.1 | 0.0 | 0.1 | 0.0  | 0.7  |
| 22:4n-3 | 0.8 | 1.2 | 0.7 | 0.0 | 0.0 | 6.6  | 6.9  | 2.8 | 0.7 | 0.2 | 1.7 | 6.4  | 1.1  |
| 22:5n-3 | 0.6 | 1.2 | 1.0 | 3.4 | 1.8 | 1.9  | 1.2  | 0.3 | 0.7 | 0.3 | 1.0 | 14.4 | 0.4  |
| 22:6n-3 | 1.2 | 0.6 | 2.4 | 0.9 | 1.5 | 1.4  | 0.9  | 0.6 | 0.7 | 0.0 | 0.5 | 0.4  | 1.8  |

**Table S36.** The FA composition (%) of polar lipids of the gorgonian genus *Gorgonia*, *Pseudopterogorgia*, and *Eunicea* (Puerto-Rico) [45].

| Fatty acid | <i>Gorgonia</i><br>(Gorgoniidae) | <i>Pseudopterogorgia</i><br>(Gorgoniidae) | <i>Eunicea</i><br>(Plexauridae) |
|------------|----------------------------------|-------------------------------------------|---------------------------------|
| 14:1n-5    | 1.2 ± 0.1                        | 0.6 ± 0.1                                 | 0.9 ± 0.4                       |
| 14:0       | 4.6 ± 0.1                        | 4.1 ± 1.0                                 | 2.7 ± 0.5                       |
| 16:1n-7    | 0.5 ± 0.1                        | 0.6 ± 0.3                                 | 6.3 ± 0.7                       |
| 16:0       | 14.0 ± 4.3                       | 17.4 ± 1.8                                | 9.0 ± 2.0                       |
| 17:0       | 0.1 ± 0.1                        | -                                         | 0.1 ± 0.1                       |
| 18:3n-6    | 13.2 ± 2.6                       | 7.3 ± 2.7                                 | 14.2 ± 3.3                      |
| 18:4n-3    | 13.6 ± 2.8                       | 12.0 ± 2.0                                | 14.3 ± 5.4                      |
| 18:2n-6    | 9.4 ± 0.9                        | 4.6 ± 1.7                                 | 2.0 ± 1.2                       |
| 18:1n-9    | 4.5 ± 0.5                        | 3.0 ± 1.5                                 | 3.9 ± 2.4                       |
| 18:0       | 4.3 ± 0.9                        | 6.7 ± 0.7                                 | 3.4 ± 1.2                       |
| 20:4n-6    | 9.7 ± 0.3                        | 17.2 ± 2.4                                | 13.1 ± 1.2                      |
| 20:5n-3    | 3.8 ± 2.6                        | 0.2 ± 0.2                                 | 1.7 ± 0.5                       |
| 20:0       | 0.5 ± 0.1                        | 0.9 ± 0.2                                 | 0.8 ± 0.5                       |
| 22:6n-3    | 7.1 ± 1.5                        | 6.1 ± 0.7                                 | 5.1 ± 1.0                       |
| 22:4n-6    | 1.2 ± 0.9                        | -                                         | 0.7 ± 0.6                       |
| 22:0       | 1.8 ± 1.8                        | 0.6 ± 0.0                                 | 0.7 ± 0.6                       |
| 24:5n-6    | 2.7 ± 1.3                        | 10.2 ± 3.7                                | 5.2 ± 3.6                       |
| 24:6n-3    | 1.2 ± 0.8                        | 3.7 ± 1.0                                 | 1.6 ± 1.0                       |
| n-6/n-3    | 1.4 ± 0.0                        | 1.8 ± 0.3                                 | 1.6 ± 0.6                       |

**Table S37.** The main FA composition (%) of the total lipids of Vietnamese hydrocorals [68].

| Fatty acid | <i>Millepora dichotoma</i> | <i>Millepora platyphylla</i> |
|------------|----------------------------|------------------------------|
| 14:0       | 2.3                        | 3.1                          |
| 16:0       | 19.8                       | 23.6                         |
| 16:1n-7    | -                          | 0.1                          |

|               |      |      |
|---------------|------|------|
| 7-Me-16:1n-10 | 0.4  | 0.5  |
| 18:0          | 15.3 | 15.4 |
| 18:1n-9       | 3.9  | 6.1  |
| 18:1n-7       | -    | 0.3  |
| 18:2n-6       | 0.1  | 0.5  |
| 18:3n-6       | -    | 0.2  |
| 18:4n-3       | 1.9  | 1.5  |
| 20:0          | 5.5  | 3.3  |
| 20:1n-9       | 0.4  | 0.2  |
| 20:2n-6       | 0.1  | 0.3  |
| 20:3n-6       | 0.3  | 0.3  |
| 20:4n-6       | -    | 0.7  |
| 20:5n-3       | 0.8  | 0.4  |
| 22:0          | 0.5  | 0.2  |
| 22:1n-9       | 0.3  | 0.2  |
| 22:4n-6       | 3.5  | 2.6  |
| 22:5n-6       | 7.3  | 6.8  |
| 22:5n-3       | 1.1  | 0.4  |
| 22:6n-3       | 33.3 | 32.0 |

**Table S38.** The main FA composition (%) of the zooxanthellae total lipids of hermatypic corals [112].

| Fatty acid | <i>Acropora divaricata</i> | <i>Acropora formosa</i> | <i>Acropora byercinthus</i> | <i>Acropora millepora</i> | <i>Acropora nasuta</i> | <i>Leptastrea pruinosa</i> | <i>Montastrea curta</i> | <i>Pocillopora damicornis</i> |
|------------|----------------------------|-------------------------|-----------------------------|---------------------------|------------------------|----------------------------|-------------------------|-------------------------------|
| 14:0       | 4.3                        | 3.3                     | 5.4                         | 3.5                       | 3.7                    | 3.4                        | 8.6                     | 4.8                           |
| 16:0       | 18.8                       | 19.0                    | 18.2                        | 23.1                      | 16.6                   | 18.1                       | 21.6                    | 20.0                          |
| 16:1       | 2.0                        | 3.9                     | 3.4                         | 2.0                       | 2.9                    | 3.9                        | 2.9                     | 2.8                           |
| 18:0       | 4.4                        | 4.4                     | 6.4                         | 6.9                       | 4.7                    | 7.1                        | 5.2                     | 7.2                           |
| 18:1       | 2.1                        | 3.3                     | 3.2                         | 3.4                       | 1.9                    | 3.7                        | 4.1                     | 2.8                           |
| 18:2n-6    | 1.0                        | 0.5                     | 1.4                         | 0.9                       | 0.8                    | 0.9                        | 1.0                     | 0.3                           |
| 18:3n-6    | 14.5                       | 9.2                     | 7.4                         | 6.2                       | 8.1                    | 8.3                        | 8.3                     | 2.8                           |
| 18:3n-3    | 0.2                        | 0.4                     | 1.0                         | 0.9                       | 0.4                    | 0.1                        | 0.1                     | 0.9                           |
| 18:4n-3    | 10.4                       | 15.8                    | 9.2                         | 10.1                      | 12.7                   | 9.2                        | 9.3                     | 18.1                          |
| 18:5n-3    | 6.7                        | 4.3                     | 4.8                         | 4.6                       | 7.6                    | 5.3                        | 5.9                     | 1.8                           |
| 20:4n-6    | 2.4                        | 2.7                     | 4.6                         | 2.8                       | 2.3                    | 7.8                        | 5.7                     | 6.3                           |
| 20:5n-3    | 20.9                       | 17.4                    | 17.3                        | 20.0                      | 22.8                   | 16.1                       | 15.2                    | 9.0                           |
| 22:4n-6    | 1.2                        | 1.1                     | 2.7                         | 1.9                       | 1.3                    | 2.6                        | 1.5                     | 3.9                           |
| 22:5n-3    | 0.4                        | 0.2                     | 1.2                         | 1.8                       | 0.8                    | 0.2                        | 0.1                     | 0.1                           |
| 22:6n-3    | 7.5                        | 7.9                     | 7.1                         | 7.9                       | 8.4                    | 6.4                        | 7.1                     | 16.0                          |

**Table S39.** The main FA composition (%) of zooxanthellae galactolipids from hermatypic corals MGDG, and DGDG [112].

| Fatty acid | <i>Acropora divaricata</i> |      | <i>Acropora formosa</i> |      | <i>Acropora byercinthus</i> |      | <i>Acropora millepora</i> |      | <i>Acropora nasuta</i> |      | <i>Leptastrea pruinosa</i> |      | <i>Pocillopora damicornis</i> |      |
|------------|----------------------------|------|-------------------------|------|-----------------------------|------|---------------------------|------|------------------------|------|----------------------------|------|-------------------------------|------|
|            | MGDG                       | DGDG | MGDG                    | DGDG | MGDG                        | DGDG | MGDG                      | DGDG | MGDG                   | DGDG | MGDG                       | DGDG | MGDG                          | DGDG |
| 14:0       | 1.0                        | 10.8 | 2.7                     | 1.7  | 2.4                         | 4.9  | 2.1                       | 2.0  | 0.3                    | 1.2  | 4.4                        | 12.6 | 1.6                           | 2.4  |
| 16:0       | 2.7                        | 2.2  | 2.3                     | 1.1  | 3.3                         | 2.3  | 3.6                       | 2.8  | 2.4                    | 1.7  | 1.3                        | 2.0  | 2.1                           | 3.9  |
| 16:1       | 1.2                        | 0.8  | 2.2                     | 0.9  | 1.5                         | 1.2  | 2.1                       | 1.2  | 1.4                    | 0.9  | 2.6                        | 1.4  | 1.1                           | 1.3  |
| 18:0       | 0.5                        | 0.5  | 0.3                     | 0.3  | 0.3                         | 0.3  | 2.6                       | 1.3  | 0.5                    | 0.4  | 0.1                        | 0.4  | 0.2                           | 0.4  |
| 18:1       | 0.8                        | 0.8  | 1.4                     | 1.3  | 1.1                         | 1.2  | 2.5                       | 1.8  | 1.0                    | 1.2  | 1.4                        | 1.2  | 2.1                           | 1.3  |
| 18:2n-6    | 1.0                        | 0.6  | 0.5                     | 0.3  | 0.7                         | 0.6  | 2.0                       | 0.4  | 0.7                    | 0.5  | 0.7                        | 0.5  | 0.6                           | 0.1  |
| 18:3n-6    | 26.0                       | 17.0 | 12.7                    | 10.3 | 15.1                        | 11.3 | 7.1                       | 8.6  | 14.9                   | 12.4 | 13.0                       | 10.4 | 1.1                           | 1.5  |
| 18:3n-3    | -                          | 0.1  | -                       | 0.1  | -                           | 0.7  | 2.0                       | 0.1  | 0.1                    | 0.2  | -                          | -    | 0.1                           | 0.1  |
| 18:4n-3    | 23.4                       | 18.6 | 39.3                    | 31.9 | 32.0                        | 22.7 | 27.5                      | 24.7 | 29.6                   | 24.3 | 25.8                       | 21.9 | 66.8                          | 55.7 |
| 18:5n-3    | 20.8                       | 10.9 | 14.9                    | 8.8  | 23.9                        | 13.4 | 18.2                      | 12.2 | 24.0                   | 13.5 | 22.7                       | 10.9 | 10.8                          | 6.1  |
| 20:4n-6    | 0.1                        | 0.3  | -                       | 0.1  | 0.1                         | 0.1  | 2.0                       | 0.6  | -                      | -    | 0.1                        | 0.1  | -                             | 0.1  |
| 20:5n-3    | 21.2                       | 35.0 | 19.2                    | 34.7 | 18.9                        | 36.6 | 19.9                      | 36.1 | 22.9                   | 40.5 | 22.3                       | 32.6 | 9.0                           | 22.9 |
| 22:4n-6    | -                          | 0.1  | -                       | 1.7  | -                           | 0.6  | -                         | 0.4  | -                      | 0.2  | -                          | 0.1  | -                             | 0.1  |
| 22:5n-3    | -                          | 0.1  | -                       | 0.3  | -                           | 0.7  | -                         | 1.0  | -                      | 0.4  | -                          | 0.3  | -                             | -    |
| 22:6n-3    | 0.8                        | 1.8  | 1.9                     | 4.2  | 0.1                         | 2.8  | 2.5                       | 2.6  | 1.2                    | 2.4  | 0.4                        | 0.9  | -                             | 1.8  |

**Table S40.** The FA composition (%) of polar lipids of three types (L, B and G) zooxanthellae isolated from cnidarians (Okinawa) [115].

| Fatty acid | <i>Millepora intricata</i> | <i>Pocillopora damicornis</i> | <i>Seriatopora caliendrum</i> | <i>Seriatopora hystrix</i> | <i>Stylophora pistillata</i> |
|------------|----------------------------|-------------------------------|-------------------------------|----------------------------|------------------------------|
|            | L                          | B                             | G                             | G                          | B + G                        |
| 14:0       | 2.4                        | 2.9                           | 2.7                           | 2.3                        | 2.5                          |
| 14:1       | 1.0                        | 0.5                           | 1.0                           | 0.6                        | 0.2                          |
| 16:0       | 12.8                       | 16.7                          | 16.6                          | 17.7                       | 18.6                         |
| 16:1n-7    | 2.1                        | 2.8                           | 4.3                           | 2.9                        | 2.9                          |
| 18:0       | 5.1                        | 7.9                           | 6.9                           | 7.6                        | 6.9                          |
| 18:1n-9    | 1.8                        | 1.9                           | 2.5                           | 1.8                        | 2.7                          |
| 18:1n-7    | 0.6                        | 1.0                           | 0.8                           | 1.0                        | 0.9                          |

|         |      |      |      |      |      |
|---------|------|------|------|------|------|
| 18:2n-6 | 0.6  | 1.6  | 1.7  | 1.4  | 1.2  |
| 18:3n-6 | 1.7  | 2.9  | 5.2  | 4.3  | 1.5  |
| 18:3n-3 | -    | 0.5  | 0.5  | 0.3  | 0.4  |
| 18:4n-3 | 26.2 | 17.5 | 10.3 | 10.0 | 17.2 |
| 18:5n-3 | 8.7  | 1.3  | 0.6  | 0.7  | 0.8  |
| 20:1    | 0.7  | 0.7  | 0.7  | 1.8  | 0.9  |
| 20:2n-6 | 0.4  | 1.1  | 0.8  | 0.8  | 0.8  |
| 20:3n-6 | 0.4  | 0.6  | 0.3  | 0.5  | 0.4  |
| 20:4n-6 | 0.1  | 7.5  | 8.6  | 11.3 | 7.5  |
| 20:5n-3 | 0.5  | 11.2 | 14.8 | 10.3 | 16.1 |
| 22:4n-6 | 4.9  | 4.6  | 3.0  | 3.5  | 2.1  |
| 22:5n-6 | 10.3 | -    | -    | -    | -    |
| 22:5n-3 | 0.5  | 1.4  | 0.9  | 1.1  | 2.1  |
| 22:6n-3 | 17.8 | 10.6 | 16.4 | 15.9 | 11.2 |

**Table S41.** The FA composition (%) of triacylglycerols of three types (L, B and G) zooxanthellae isolated from cnidarians (Okinawa) [115].

| Fatty acid | <i>Millepora intricata</i> | <i>Pocillopora damicornis</i> | <i>Seriatopora caliendrum</i> | <i>Seriatopora hystrix</i> | <i>Stylophora pistillata</i> |
|------------|----------------------------|-------------------------------|-------------------------------|----------------------------|------------------------------|
|            | L                          | B                             | G                             | G                          | B + G                        |
| 14:0       | 2.9                        | 4.6                           | 8.2                           | 8.0                        | 5.1                          |
| 16:0       | 26.0                       | 42.3                          | 31.4                          | 32.0                       | 37.2                         |
| 16:1n-7    | 1.0                        | 5.8                           | 11.9                          | 12.3                       | 6.2                          |
| 17:0       | 0.4                        | -                             | 0.5                           | 0.2                        | 0.2                          |
| 18:0       | 20.9                       | 5.0                           | 4.8                           | 4.4                        | 4.3                          |
| 18:1n-9    | 4.2                        | 8.9                           | 8.7                           | 6.1                        | 14.1                         |
| 18:1n-7    | 0.4                        | 1.1                           | 1.3                           | 1.3                        | 2.0                          |
| 18:2n-6    | 1.2                        | 2.1                           | 3.1                           | 2.0                        | 0.9                          |
| 18:3n-6    | 1.8                        | 2.5                           | 0.5                           | 0.3                        | 1.1                          |
| 18:3n-3    | -                          | 0.2                           | 1.0                           | 0.2                        | 0.2                          |
| 18:4n-3    | -                          | 0.2                           | -                             | -                          | 0.1                          |
| 18:5n-3    | 0.1                        | -                             | -                             | 0.3                        | -                            |
| 20:1       | -                          | -                             | -                             | 0.3                        | -                            |
| 20:2n-6    | 0.3                        | 0.1                           | -                             | 0.6                        | -                            |
| 20:3n-6    | -                          | 0.1                           | 0.5                           | -                          | -                            |
| 20:4n-6    | -                          | 0.4                           | 1.3                           | 0.6                        | 0.5                          |
| 20:5n-3    | -                          | 2.5                           | 4.0                           | 4.5                        | 3.4                          |
| 22:4n-6    | 1.0                        | 0.5                           | 0.5                           | 0.4                        | 0.4                          |
| 22:5n-3    | -                          | 0.7                           | 0.5                           | 1.0                        | 1.4                          |
| 22:6n-3    | 39.2                       | 21.8                          | 19.3                          | 23.3                       | 21.2                         |

**Table S42.** The main FA composition (%) of the total lipids in intact colonies, zooxanthellae, and the host tissue of the soft coral *Simularia* sp. (mean  $\pm$  SD,  $n = 3$ ) [68].

| Lipid class           | Intact colonies | Zooxanthellae  | Host tissue    |
|-----------------------|-----------------|----------------|----------------|
| 14:0 <sup>*a</sup>    | 2.5 $\pm$ 0.3   | 3.5 $\pm$ 0.3  | 1.4 $\pm$ 0.3  |
| 14:1                  | 0.2 $\pm$ 0.1   | 1.4 $\pm$ 0.3  | -              |
| 16:0                  | 31.3 $\pm$ 4.6  | 24.7 $\pm$ 1.0 | 28.8 $\pm$ 4.1 |
| 16:1n-9               | 0.3 $\pm$ 0.1   | 0.8 $\pm$ 0.3  | -              |
| 16:1n-7               | 2.1 $\pm$ 0.5   | 1.8 $\pm$ 0.0  | 2.0 $\pm$ 0.3  |
| 16:2n-7 <sup>*</sup>  | 4.6 $\pm$ 0.6   | 6.0 $\pm$ 0.5  | 4.2 $\pm$ 2.5  |
| 16:3n-4 <sup>**</sup> | 1.6 $\pm$ 0.5   | 4.5 $\pm$ 0.3  | 1.1 $\pm$ 0.3  |
| 16:4n-1 <sup>**</sup> | 1.4 $\pm$ 0.6   | 4.4 $\pm$ 0.5  | 0.4 $\pm$ 0.2  |
| 18:0 <sup>*</sup>     | 9.1 $\pm$ 0.7   | 5.1 $\pm$ 0.6  | 14.3 $\pm$ 1.8 |
| 18:1n-9               | 2.2 $\pm$ 0.3   | 2.9 $\pm$ 0.1  | 2.6 $\pm$ 0.3  |
| 18:1n-7 <sup>*</sup>  | 0.3 $\pm$ 0.1   | 0.2 $\pm$ 0.1  | 0.7 $\pm$ 0.1  |
| 18:2n-7 <sup>**</sup> | 2.0 $\pm$ 0.4   | 0.8 $\pm$ 0.1  | 4.0 $\pm$ 0.7  |
| 18:2n-6               | 0.3 $\pm$ 0.1   | 0.4 $\pm$ 0.0  | 1.4 $\pm$ 0.6  |
| 18:3n-4 <sup>*</sup>  | 1.0 $\pm$ 0.2   | 0.3 $\pm$ 0.1  | 1.7 $\pm$ 0.2  |
| 18:3n-3               | 0.4 $\pm$ 0.1   | 0.4 $\pm$ 0.1  | 0.4 $\pm$ 0.1  |
| 18:4n-3 <sup>**</sup> | 3.9 $\pm$ 0.3   | 13.3 $\pm$ 0.7 | 1.3 $\pm$ 0.2  |
| 20:0 <sup>*</sup>     | 0.6 $\pm$ 0.0   | 0.4 $\pm$ 0.1  | 1.0 $\pm$ 0.3  |
| 20:3n-6 <sup>*</sup>  | 0.3 $\pm$ 0.1   | 0.1 $\pm$ 0.0  | 1.0 $\pm$ 0.3  |
| 20:4n-6 <sup>**</sup> | 18.1 $\pm$ 5.5  | 6.7 $\pm$ 0.8  | 14.8 $\pm$ 1.7 |
| 20:4n-3 <sup>**</sup> | 0.9 $\pm$ 0.3   | 0.2 $\pm$ 0.1  | 1.3 $\pm$ 0.2  |
| 20:5n-3 <sup>**</sup> | 2.5 $\pm$ 0.3   | 6.3 $\pm$ 0.5  | 0.6 $\pm$ 0.1  |
| 22:4n-6               | 0.4 $\pm$ 0.1   | 0.1 $\pm$ 0.0  | 0.8 $\pm$ 0.5  |
| 22:6n-3 <sup>**</sup> | 2.1 $\pm$ 0.6   | 7.9 $\pm$ 0.8  | 0.9 $\pm$ 0.1  |
| 24:5n-6 <sup>**</sup> | 3.8 $\pm$ 1.0   | 0.8 $\pm$ 0.3  | 5.0 $\pm$ 0.9  |
| 24:6n-3 <sup>*</sup>  | 1.2 $\pm$ 0.2   | 0.3 $\pm$ 0.2  | 1.6 $\pm$ 0.3  |

<sup>a</sup> Significant difference between zooxanthellae and the host tissue: \*  $P < 0.01$ , \*\*  $P < 0.01$ .

**Table S43.** Main fatty acid composition (% of total FA) of the total lipids found in the symbiont fractions (SF) and in the host fractions (HF) of cnidarians. Values are means of triplicate samples  $\pm$  SD [122].

| Fatty acid | <i>Millepora platyphylla</i> |                | <i>Simularia cf. capitalis</i> |                | <i>Simularia polydactyla</i> |                |
|------------|------------------------------|----------------|--------------------------------|----------------|------------------------------|----------------|
|            | SF                           | HF             | SF                             | HF             | SF                           | HF             |
| 14:0       | 2.2 $\pm$ 0.3                | 2.0 $\pm$ 0.4  | 6.5 $\pm$ 0.1                  | 2.1 $\pm$ 0.0  | 3.3 $\pm$ 0.8                | 1.4 $\pm$ 0.3  |
| 16:0       | 18.1 $\pm$ 1.1               | 22.3 $\pm$ 2.5 | 24.5 $\pm$ 4.2                 | 38.7 $\pm$ 1.7 | 26.3 $\pm$ 3.2               | 28.8 $\pm$ 4.1 |
| 16:1n-9    | 0.5 $\pm$ 0.3                | 0.2 $\pm$ 0.0  | 0.9 $\pm$ 0.2                  | - <sup>a</sup> | 0.6 $\pm$ 0.1                | -              |
| 16:1n-7    | 0.3 $\pm$ 0.2                | 0.2 $\pm$ 0.1  | 1.9 $\pm$ 0.1                  | 3.0 $\pm$ 0.2  | 1.9 $\pm$ 0.3                | 2.0 $\pm$ 0.3  |
| 16:2n-7    | -                            | -              | 5.7 $\pm$ 0.3                  | 3.8 $\pm$ 0.7  | 4.8 $\pm$ 0.3                | 4.1 $\pm$ 0.8  |
| 16:3n-4    | -                            | -              | 4.1 $\pm$ 0.8                  | 1.1 $\pm$ 0.4  | 4.2 $\pm$ 1.6                | 1.1 $\pm$ 0.3  |
| 16:4n-1    | -                            | -              | 3.7 $\pm$ 0.8                  | 0.5 $\pm$ 0.1  | 1.5 $\pm$ 0.8                | 0.4 $\pm$ 0.2  |

|         |            |            |            |            |            |            |
|---------|------------|------------|------------|------------|------------|------------|
| 18:0    | 7.7 ± 0.9  | 20.1 ± 0.6 | 5.7 ± 2.5  | 14.6 ± 0.3 | 8.5 ± 1.8  | 14.3 ± 1.8 |
| 18:1n-9 | 3.4 ± 0.5  | 3.5 ± 1.2  | 2.7 ± 0.2  | 3.1 ± 0.2  | 2.0 ± 0.3  | 2.6 ± 0.3  |
| 18:1n-7 | 0.1 ± 0.0  | 0.1 ± 0.0  | 0.3 ± 0.1  | 0.6 ± 0.1  | 0.3 ± 0.1  | 0.7 ± 0.1  |
| 18:2n-7 | -          | -          | 0.9 ± 0.3  | 2.0 ± 0.1  | 1.9 ± 0.5  | 4.0 ± 0.7  |
| 18:2n-6 | 0.3 ± 0.0  | 0.1 ± 0.0  | 0.3 ± 0.1  | 0.9 ± 0.4  | 0.5 ± 0.2  | 1.4 ± 0.6  |
| 18:3n-6 | 0.1 ± 0.0  | -          | 0.4 ± 0.1  | -          | -          | 0.2 ± 0.1  |
| 18:4n-3 | 17.3 ± 4.5 | 0.9 ± 0.1  | 10.6 ± 3.3 | 1.2 ± 0.0  | 9.1 ± 2.2  | 1.3 ± 0.2  |
| 20:0    | 2.5 ± 0.2  | 4.7 ± 0.3  | 0.4 ± 0.1  | 1.3 ± 0.1  | 0.6 ± 0.2  | 1.0 ± 0.3  |
| 20:1    | 0.7 ± 0.1  | 0.2 ± 0.1  | 0.3 ± 0.0  | 0.1 ± 0.0  | 0.2 ± 0.1  | -          |
| 18:5n-3 | 4.8 ± 0.5  | 0.1 ± 0.0  | 1.5 ± 0.4  | 0.7 ± 0.3  | 0.9 ± 0.4  | -          |
| 20:2n-6 | 0.8 ± 0.2  | -          | 0.5 ± 0.4  | -          | 0.3 ± 0.1  | 0.2 ± 0.1  |
| 20:3n-6 | 0.4 ± 0.1  | 0.2 ± 0.0  | 0.2 ± 0.0  | 0.5 ± 0.4  | 0.6 ± 0.2  | 1.0 ± 0.3  |
| 20:4n-6 | 0.2 ± 0.1  | 0.1 ± 0.0  | 8.1 ± 1.1  | 12.1 ± 1.6 | 12.3 ± 3.0 | 14.8 ± 1.7 |
| 20:5n-3 | 3.4 ± 1.0  | 0.4 ± 0.1  | 5.0 ± 1.2  | 1.2 ± 0.1  | 4.3 ± 0.8  | 0.6 ± 0.1  |
| 22:4n-6 | 4.0 ± 0.7  | 3.5 ± 0.5  | 0.3 ± 0.1  | 0.4 ± 0.0  | 0.3 ± 0.1  | 0.8 ± 0.5  |
| 22:5n-6 | 5.0 ± 0.2  | 6.7 ± 1.0  | -          | -          | 0.2 ± 0.1  | 0.3 ± 0.0  |
| 22:5n-3 | 0.6 ± 0.1  | 0.7 ± 0.1  | 0.2 ± 0.0  | 0.4 ± 0.3  | 0.2 ± 0.1  | -          |
| 22:6n-3 | 22.7 ± 1.3 | 31.7 ± 2.2 | 7.8 ± 1.2  | 1.2 ± 0.1  | 5.3 ± 1.5  | 0.9 ± 0.1  |
| 24:5n-6 | -          | -          | 1.5 ± 0.4  | 3.2 ± 0.6  | 3.2 ± 1.1  | 5.0 ± 0.9  |
| 24:6n-3 | -          | -          | 0.5 ± 0.3  | 1.0 ± 0.1  | 0.5 ± 0.2  | 1.0 ± 0.3  |

<sup>a</sup>Not detected or less than 0.1%.

**Table S43.** (continued).

| Fatty acid | <i>Acropora intermedia</i> |            | <i>Acropora muricata</i> |            | <i>Montipora digitata</i> |            |
|------------|----------------------------|------------|--------------------------|------------|---------------------------|------------|
|            | SF                         | HF         | SF                       | HF         | SF                        | HF         |
| 14:0       | 2.7 ± 0.5                  | 1.9 ± 0.3  | 2.2 ± 1.7                | 1.8 ± 0.5  | 3.0 ± 0.8                 | 3.5 ± 0.1  |
| 16:0       | 18.6 ± 1.7                 | 20.1 ± 3.4 | 16.0 ± 5.0               | 17.9 ± 2.4 | 19.9 ± 2.5                | 33.7 ± 6.5 |
| 16:1n-9    | 1.5 ± 0.6                  | 1.2 ± 0.4  | 0.8 ± 0.3                | 1.3 ± 0.9  | 4.1 ± 0.7                 | 1.2 ± 0.2  |
| 16:1n-7    | 1.9 ± 0.5                  | 1.1 ± 0.2  | 2.7 ± 0.3                | 1.9 ± 1.1  | 2.7 ± 2.2                 | 2.9 ± 0.7  |
| 16:2n-7    | -                          | 0.2 ± 0.1  | 0.9 ± 0.4                | 0.1 ± 0.0  | 0.8 ± 0.8                 | 0.2 ± 0.1  |
| 16:3n-4    | -                          | -          | -                        | -          | -                         | -          |
| 16:4n-1    | -                          | -          | -                        | -          | -                         | -          |
| 18:0       | 5.4 ± 1.2                  | 13.6 ± 2.6 | 3.5 ± 1.5                | 18.2 ± 2.6 | 3.0 ± 0.9                 | 7.7 ± 1.6  |
| 18:1n-9    | 2.9 ± 0.4                  | 3.0 ± 0.4  | 2.7 ± 0.4                | 3.3 ± 0.6  | 2.2 ± 0.9                 | 2.9 ± 2.0  |
| 18:1n-7    | 0.6 ± 0.6                  | 0.3 ± 0.0  | 0.3 ± 0.3                | 0.4 ± 0.0  | 0.1 ± 0.0                 | 0.3 ± 0.1  |
| 18:2n-7    | 0.1 ± 0.0                  | -          | 0.1 ± 0.0                | -          | -                         | 0.1 ± 0.0  |
| 18:2n-6    | 1.0 ± 0.4                  | 0.6 ± 0.1  | 1.1 ± 0.1                | 0.9 ± 0.2  | 1.0 ± 0.3                 | 1.3 ± 0.1  |
| 18:3n-6    | 8.2 ± 0.5                  | 2.7 ± 0.8  | 11.4 ± 0.1               | 2.7 ± 1.0  | 17.2 ± 2.8                | 3.6 ± 1.9  |
| 18:4n-3    | 13.0 ± 0.9                 | 0.9 ± 0.3  | 14.1 ± 1.0               | 1.3 ± 0.6  | 15.0 ± 5.4                | 1.3 ± 0.6  |
| 20:0       | 0.3 ± 0.0                  | 2.2 ± 0.4  | 0.4 ± 0.3                | 0.9 ± 0.0  | 0.2 ± 0.1                 | 0.4 ± 0.1  |
| 20:1       | 1.3 ± 0.2                  | 2.8 ± 0.4  | 0.9 ± 0.2                | 3.6 ± 0.3  | 1.0 ± 0.1                 | 0.2 ± 0.1  |
| 18:5n-3    | 2.8 ± 0.4                  | 0.2 ± 0.1  | 2.6 ± 0.7                | 0.2 ± 0.1  | 5.1 ± 1.4                 | 0.1 ± 0.0  |



|         |            |            |            |            |           |            |
|---------|------------|------------|------------|------------|-----------|------------|
| 20:2n-6 | 2.0 ± 1.4  | 0.4 ± 0.1  | 2.6 ± 1.7  | 0.4 ± 0.1  | 0.5 ± 0.7 | 0.5 ± 0.1  |
| 20:3n-6 | 0.4 ± 0.1  | 1.0 ± 0.1  | 0.4 ± 0.1  | 0.8 ± 0.1  | 0.5 ± 0.2 | 1.6 ± 0.2  |
| 20:4n-6 | 5.3 ± 0.8  | 17.2 ± 3.1 | 2.9 ± 1.5  | 13.7 ± 1.2 | 3.4 ± 1.6 | 9.9 ± 2.1  |
| 20:5n-3 | 14.7 ± 1.6 | 8.7 ± 1.8  | 15.8 ± 3.8 | 10.2 ± 0.7 | 6.7 ± 2.5 | 1.9 ± 0.5  |
| 22:4n-6 | 2.3 ± 0.4  | 8.1 ± 1.6  | 1.2 ± 0.4  | 8.1 ± 1.3  | 4.8 ± 2.4 | 22.5 ± 7.4 |
| 22:5n-6 | -          | -          | -          | 0.1 ± 0.0  | -         | -          |
| 22:5n-3 | 2.1 ± 0.3  | 4.3 ± 0.2  | 1.2 ± 0.5  | 4.0 ± 0.6  | 1.3 ± 0.6 | 2.1 ± 0.9  |
| 22:6n-3 | 8.4 ± 1.1  | 5.0 ± 0.3  | 11.4 ± 3.4 | 3.6 ± 0.6  | 6.9 ± 1.6 | 1.0 ± 0.6  |
| 24:5n-6 | -          | -          | -          | -          | -         | -          |
| 24:6n-3 | -          | -          | -          | -          | -         | -          |

**Table S43.** (continued).

| Fatty acid | <i>Montipora foliosa</i> |            | <i>Pavona decussata</i> |            | <i>Pocillopora damicornis</i> |            | <i>Porites cylindrica</i> |            |
|------------|--------------------------|------------|-------------------------|------------|-------------------------------|------------|---------------------------|------------|
|            | SF                       | HF         | SF                      | HF         | SF                            | HF         | SF                        | HF         |
| 14:0       | 3.0 ± 0.3                | 2.9 ± 0.1  | 2.1 ± 0.4               | 5.4 ± 0.7  | 2.9 ± 0.5                     | 3.3 ± 0.3  | 3.5 ± 0.3                 | 3.1 ± 1.3  |
| 16:0       | 18.5 ± 1.3               | 29.4 ± 0.9 | 15.9 ± 1.4              | 27.4 ± 3.8 | 21.7 ± 2.2                    | 31.9 ± 0.9 | 16.3 ± 1.6                | 30.1 ± 5.6 |
| 16:1n-9    | 1.9 ± 0.7                | 1.5 ± 0.4  | 0.2 ± 0.1               | 0.3 ± 0.0  | 0.5 ± 0.1                     | -          | 0.5 ± 0.1                 | 1.1 ± 0.4  |
| 16:1n-7    | 2.0 ± 0.1                | 1.8 ± 0.1  | 1.7 ± 0.2               | 4.5 ± 0.6  | 4.5 ± 0.3                     | 3.5 ± 0.3  | 1.1 ± 0.2                 | 2.6 ± 1.3  |
| 16:2n-7    | 0.7 ± 0.4                | 0.1 ± 0.0  | -                       | 0.1 ± 0.0  | 0.9 ± 0.3                     | 0.2 ± 0.0  | 1.6 ± 0.4                 | 0.2 ± 0.1  |
| 16:3n-4    | -                        | -          | -                       | -          | -                             | -          | -                         | -          |
| 16:4n-1    | -                        | -          | -                       | -          | -                             | -          | -                         | -          |
| 18:0       | 2.5 ± 0.6                | 8.7 ± 0.4  | 2.8 ± 0.7               | 19.0 ± 2.9 | 5.2 ± 0.2                     | 8.2 ± 0.5  | 4.7 ± 0.8                 | 10.1 ± 2.5 |
| 18:1n-9    | 4.0 ± 0.8                | 7.3 ± 0.9  | 1.4 ± 0.3               | 7.9 ± 1.5  | 2.6 ± 0.5                     | 6.1 ± 0.2  | 3.3 ± 0.5                 | 5.1 ± 2.3  |
| 18:1n-7    | 0.5 ± 0.4                | 0.3 ± 0.1  | 0.2 ± 0.1               | 4.0 ± 1.1  | 0.3 ± 0.1                     | 0.5 ± 0.0  | 0.2 ± 0.0                 | 0.4 ± 0.2  |
| 18:2n-7    | 0.1 ± 0.1                | -          | 0.1 ± 0.0               | 0.3 ± 0.1  | -                             | 0.1 ± 0.0  | 0.3 ± 0.0                 | 0.1 ± 0.0  |
| 18:2n-6    | 1.0 ± 0.2                | 2.4 ± 1.2  | 0.8 ± 0.2               | 0.9 ± 0.2  | 1.0 ± 0.1                     | 1.3 ± 0.1  | 0.8 ± 0.2                 | 1.1 ± 0.7  |
| 18:3n-6    | 23.4 ± 1.4               | 2.4 ± 0.4  | 12.4 ± 1.2              | 0.3 ± 0.0  | 4.8 ± 0.2                     | 4.4 ± 0.3  | 8.2 ± 0.7                 | 2.8 ± 1.1  |
| 18:4n-3    | 10.3 ± 0.8               | 0.6 ± 0.2  | 29.5 ± 2.7              | 1.3 ± 0.4  | 10.3 ± 0.9                    | 0.7 ± 0.1  | 13.1 ± 2.1                | 0.9 ± 0.3  |
| 20:0       | 0.2 ± 0.1                | 0.4 ± 0.0  | 0.3 ± 0.1               | -          | 0.8 ± 0.0                     | 1.5 ± 0.1  | 0.2 ± 0.1                 | 1.0 ± 0.7  |
| 20:1       | 0.9 ± 0.1                | 0.4 ± 0.1  | 0.2 ± 0.1               | 0.6 ± 0.3  | 1.2 ± 0.3                     | 1.0 ± 0.1  | 0.6 ± 0.2                 | 1.7 ± 0.4  |
| 18:5n-3    | 5.6 ± 0.2                | 0.4 ± 0.2  | 2.3 ± 0.4               | 0.8 ± 0.2  | 2.3 ± 0.3                     | 0.1 ± 0.0  | 3.9 ± 0.5                 | 0.2 ± 0.1  |
| 20:2n-6    | 0.5 ± 0.6                | 0.6 ± 0.1  | 0.7 ± 0.2               | -          | 0.5 ± 0.3                     | 0.6 ± 0.0  | 1.2 ± 0.3                 | 0.5 ± 0.1  |
| 20:3n-6    | 0.2 ± 0.0                | 1.1 ± 0.1  | 0.2 ± 0.0               | 2.5 ± 0.7  | 2.1 ± 0.2                     | 5.6 ± 0.4  | -                         | 1.8 ± 0.9  |
| 20:4n-6    | 2.3 ± 0.5                | 11.2 ± 1.2 | 4.2 ± 0.9               | 10.3 ± 1.9 | 6.2 ± 0.4                     | 8.8 ± 0.7  | 8.0 ± 1.3                 | 10.2 ± 1.7 |
| 20:5n-3    | 5.1 ± 0.6                | 1.9 ± 0.2  | 7.7 ± 0.7               | 1.7 ± 0.3  | 14.2 ± 1.2                    | 3.1 ± 0.1  | 7.7 ± 1.1                 | 4.4 ± 0.4  |
| 22:4n-6    | 3.6 ± 0.3                | 20.2 ± 1.9 | 1.3 ± 0.4               | 6.4 ± 2.3  | 3.0 ± 0.2                     | 5.1 ± 0.9  | 3.4 ± 0.4                 | 10.7 ± 2.7 |
| 22:5n-6    | -                        | -          | -                       | -          | -                             | -          | -                         | 0.1 ± 0.0  |
| 22:5n-3    | 0.6 ± 0.0                | 2.0 ± 0.2  | 1.4 ± 0.3               | 0.5 ± 0.1  | 0.8 ± 0.2                     | 1.2 ± 0.0  | 1.9 ± 0.2                 | 2.4 ± 1.5  |
| 22:6n-3    | 7.7 ± 1.7                | 1.2 ± 0.0  | 9.2 ± 0.9               | 2.8 ± 0.8  | 9.8 ± 0.5                     | 9.6 ± 0.1  | 9.2 ± 1.5                 | 3.6 ± 1.4  |
| 24:5n-6    | -                        | -          | -                       | -          | -                             | -          | -                         | -          |
| 24:6n-3    | -                        | -          | -                       | -          | -                             | -          | -                         | -          |

**Table S44.** Hard coral species from Vietnam and Seychelles used for statistical analysis [103].

| N  | Family           | Species                         | Region     | Sampling site      |
|----|------------------|---------------------------------|------------|--------------------|
| 1  | Acroporidae      | <i>Acropora nasuta</i> *        | Vietnam    | The Tyam Island    |
| 2  |                  | <i>Acropora nasuta</i> *        | Vietnam    | The Thotyu Island  |
| 3  |                  | <i>Acropora millepora</i> *     | Vietnam    | The Tyam Island    |
| 4  |                  | <i>Acropora millepora</i> *     | Vietnam    | The Thotyu Island  |
| 5  |                  | <i>Acropora florida</i> *       | Vietnam    | The Thotyu Island  |
| 6  |                  | <i>Acropora cerealis</i>        | Vietnam    | The Mun Island     |
| 7  |                  | <i>Acropora Formosa</i>         | Vietnam    | The Mun Island     |
| 8  |                  | <i>Acropora gemmifera</i>       | Vietnam    | The Mun Island     |
| 9  |                  | <i>Acropora palifera</i>        | Vietnam    | The Mun Island     |
| 10 |                  | <i>Acropora</i> sp.             | Vietnam    | The Nha Trang Bay  |
| 11 |                  | <i>Acropora nobilis</i>         | Vietnam    | The Nha Trang Bay  |
| 12 | Pocilloporidae   | <i>Seriatopora caliendrum</i> * | Сейшелы    | The Aldabra Island |
| 13 |                  | <i>Seriatopora hystrix</i>      | Vietnam    | The Mun Island     |
| 14 |                  | <i>Stylophora pistillata</i> *  | Seychelles | The Coetivy Island |
| 15 |                  | <i>Stylophora pistillata</i> *  | Vietnam    | The Tyam Island    |
| 16 |                  | <i>Stylophora pistillata</i> *  | Vietnam    | The Thotyu Island  |
| 17 |                  | <i>Stylophora pistilata</i>     | Vietnam    | The Mun Island     |
| 18 |                  | <i>Pocillopora damicornis</i> * | Vietnam    | The Thotyu Island  |
| 19 |                  | <i>Pocillopora damicornis</i> * | Vietnam    | The Thotyu Island  |
| 20 |                  | <i>Pocillopora damicornis</i>   | Vietnam    | The Mun Island     |
| 21 |                  | <i>Pocillopora verrucosa</i> *  | Vietnam    | The Thotyu Island  |
| 22 | Pectiniidae      | <i>Echinophyllia orpheensis</i> | Vietnam    | The Nha Trang Bay  |
| 23 | Fungiidae        | <i>Sandalolitha robusta</i>     | Vietnam    | The Nha Trang Bay  |
| 24 | Poritidae        | <i>Goniopora</i> sp. I*         | Vietnam    | The Tyam Island    |
| 25 |                  | <i>Goniopora</i> sp. II*        | Vietnam    | The Tyam Island    |
| 26 |                  | <i>Porites cylindrica</i>       | Vietnam    | The Mun Island     |
| 27 |                  | <i>Porites nigrescens</i>       | Vietnam    | The Mun Island     |
| 28 |                  | <i>Porites lobata</i>           | Vietnam    | The Nha Trang Bay  |
| 29 | Faviidae         | <i>Favia</i> sp. I              | Vietnam    | The Nha Trang Bay  |
| 30 |                  | <i>Favia</i> sp. II             | Vietnam    | The Nha Trang Bay  |
| 31 | Dendrophylliidae | <i>Tubastrea coccinea</i> *     | Сейшелы    | The Aldabra Island |
| 32 |                  | <i>Tubastrea micrantha</i> *    | Seychelles | The Aldabra Island |
| 33 | Milleporidae     | <i>Millepora</i> sp.*           | Vietnam    | The Thotyu Island  |

|    |  |                               |            |                    |
|----|--|-------------------------------|------------|--------------------|
| 34 |  | <i>Millepora platyphylla*</i> | Seychelles | The Aldabra Island |
| 35 |  | <i>Millepora dichotoma*</i>   | Seychelles | The Aldabra Island |

\* Data on FA composition from Latyshev et al., 1991.

**Table S45.** The main FA composition (% of total) of heterotrophic bacteria, associated with colonies of 11 health hard coral species (of the genera *Montipora*, *Porites*, *Acropora*, and *Hydnophora*) collected in Nha Trang Bay (Vietnam) [213].

| Fatty acid | <i>Pseudomonas</i> |      |          | <i>Halomonas</i> |      | <i>Bacillus</i> | <i>Planococcus</i> | <i>Micrococcus</i> | <i>Vibrio</i> |
|------------|--------------------|------|----------|------------------|------|-----------------|--------------------|--------------------|---------------|
|            | 344                | 368  | 374      | 350              | 369  | 356             | 362                | 370                | 366           |
| 10:0       | 3.2                | –    | 0.7      | 2.8              | 1.1  | –               | –                  | –                  | –             |
| 12:0       | 4.6                | 3.4  | 1.5      | 3.6              | 1.1  | –               | –                  | –                  | 3.9           |
| i-13:0     | –                  | –    | –        | –                | –    | –               | –                  | 0.6                | 0.5           |
| ai-13:0    | –                  | –    | –        | –                | –    | –               | –                  | 2.5                | –             |
| i-14:0     | –                  | –    | –        | –                | –    | 0.9             | 2.4                | 4.3                | –             |
| 14:0       | 0.1                | 0.1  | 0.3      | 0.2              | 3.2  | 0.5             | 0.5                | 5.1                | 0.7           |
| i-15:0     | –                  | –    | –        | –                | –    | 6.3             | 12.1               | 8.5                | –             |
| ai-15:0    | –                  | –    | –        | –                | –    | 60.0            | 44.9               | 75.3               | 0.6           |
| 15:0       | 0.1                | –    | 0.1      | –                | –    | 0.6             | 2.4                | 2.3                | 3.2           |
| 15:1n-8    | –                  | –    | –        | –                | –    | –               | –                  | 0.8                | 1.3           |
| i-16:0     | –                  | –    | –        | –                | –    | 5.0             | 1.9                | 1.5                | 0.9           |
| 16:0       | 22.2               | 23.1 | 18.4     | 20.7             | 21.8 | 12.8            | 0.7                | 0.4                | 14.2          |
| i-16:1     | –                  | –    | –        | –                | –    | –               | 6.5                | 0.8                | –             |
| 16:1n-7    | 44.1               | 42.3 | 9.7      | 33.2             | 17.5 | –               | –                  | 0.9                | 42.0          |
| 16:1n-9    | –                  | –    | –        | –                | –    | –               | 3.1                | –                  | –             |
| i-17:0     | –                  | –    | –        | –                | –    | –               | 3.2                | 0.9                | –             |
| ai-17:0    | –                  | –    | –        | –                | –    | 10.6            | 11.5               | –                  | –             |
| 17:0       | 0.1                | –    | 0.1      | –                | –    | –               | 0.8                | –                  | 1.6           |
| i-17:1     | –                  | –    | –        | –                | –    | –               | 2.8                | –                  | –             |
| ai-17:1    | –                  | –    | –        | –                | –    | –               | 4.9                | –                  | –             |
| 17:1n-8    | 0.2                | –    | –        | –                | –    | –               | –                  | 0.8                | 2.5           |
| cy-17:0    | 4.2                | 3.3  | 6.2      | –                | –    | –               | –                  | 0.5                | –             |
| i-18:0     | –                  | –    | –        | –                | –    | –               | 0.5                | –                  | –             |
| 18:0       | –                  | –    | 0.1      | 0.4              | –    | –               | 0.3                | –                  | –             |
| 18:1n-9    | –                  | –    | –        | –                | –    | –               | –                  | –                  | –             |
| 18:1n-7    | 20.1               | 24.8 | 36.4     | 38.2             | 57.8 | –               | 1.1                | –                  | 23.2          |
| cy-19:0    | –                  | –    | 2<br>5.8 | –                | –    | –               | –                  | –                  | –             |
